# Supplementary material
Source: Royal Society of Chemistry journal article supplement (doi:10.1039/d6nr02052f)
Supplement: d6nr02052f1.pdf [file d6nr02052f1.pdf]

## Supporting Information

### **Using nature's blueprint porous organic polymeric nanotraps enables the interfacial activation of the hosted amine and CO<sub>2</sub>**

Saiqa Gull,<sup>a,‡</sup> Ankita Boruah,<sup>a,b,‡</sup> Bishal Boro,<sup>a</sup> Vipin Agarwal,<sup>c</sup> Abhijit Shrotri,<sup>d</sup> Keun Hwa Chae,<sup>e</sup> Duy Quang Dao,<sup>\*,f,g</sup> & John Mondal <sup>\*,a,b</sup>

<sup>a</sup>Organic & Medicinal Chemistry Division, CSIR-Indian Institute of Chemical Biology, 4-Raja S. C. Mullick Road, Jadavpur, Kolkata, 700032, India. E-mail: [johneuchem@gmail.com](mailto:johneuchem@gmail.com); [johnmondal@iicb.res.in](mailto:johnmondal@iicb.res.in)

<sup>b</sup>Academy of Scientific and Innovative Research (AcSIR), Ghaziabad-201002, India.

<sup>c</sup>Tata Institute of Fundamental Research Hyderabad, Hyderabad 500046, Telangana, India.

<sup>d</sup>Institute for Catalysis, Hokkaido University, Kita 21 Nishi 10, Kita-Ku, Sapporo 001-0021, Japan.

<sup>e</sup>Advanced Analysis and Data Centre, Korea Institute of Science and Technology Seoul, 02792, Republic of Korea.

<sup>f</sup>Institute of Research and Development, Duy Tan University, Da Nang, 550000, Vietnam. E-mail: [daoduyquang@duytan.edu.vn](mailto:daoduyquang@duytan.edu.vn)

<sup>g</sup>School of Engineering and Technology, Duy Tan University, Da Nang 550000, Vietnam.

<sup>‡</sup>These two authors have contributed equally.

## Table of Contents

| Entry | Content                                                                                                                   | Page No. |
|-------|---------------------------------------------------------------------------------------------------------------------------|----------|
| 1     | Materials and Methods                                                                                                     | S3-S5    |
| 2     | Characterization Technique Details                                                                                        | S5-S7    |
| 3     | Experimental Section                                                                                                      | S7       |
| 4     | <sup>13</sup> C CP SS MAS NMR spectrum of <b>His-POP</b> and <b>Zn@His-POP</b>                                            | S8       |
| 5     | FT-IR spectrum of <b>T-POP</b> , <b>His-POP</b> and <b>Zn@His-POP</b>                                                     | S9       |
| 6     | Wide Angle Powder X-ray Diffraction (PXRD) analysis                                                                       | S10      |
| 7     | CHN analysis of <b>His-POP</b> and <b>Zn@His-POP</b>                                                                      | S11      |
| 8     | ICP-MS analysis of <b>Zn@His-POP</b> and reused <b>Zn@His-POP</b>                                                         | S12      |
| 9     | Thermogravimetric analysis (TGA) of <b>His-POP</b> and <b>Zn@His-POP</b>                                                  | S13      |
| 10    | Pore size distribution for <b>His-POP</b> and <b>Zn@His-POP</b>                                                           | S14      |
| 11    | CO <sub>2</sub> adsorption-desorption analysis of <b>His-POP</b> and <b>Zn@His-POP</b>                                    | S15      |
| 12    | XPS survey spectrum of <b>His-POP</b> and <b>Zn@His-POP</b>                                                               | S16      |
| 13    | FE-SEM images of <b>His-POP</b>                                                                                           | S17      |
| 14    | FE-SEM images of <b>Zn@His-POP</b>                                                                                        | S18      |
| 15    | Parameters obtained after fitting the XAS data of <b>Zn@His-POP</b>                                                       | S19      |
| 16    | <sup>1</sup> H NMR spectrum of <b>N-methyl-N-phenylformamide</b>                                                          | S20      |
| 17    | <sup>13</sup> C NMR spectrum of <b>N-methyl-N-phenylformamide</b>                                                         | S21      |
| 18    | Comparison in the catalytic performance for N-formylation reaction with <b>T-POP</b> , and <b>Zn@His-POP</b> respectively | S22      |
| 19    | Reusability potential diagram of <b>Zn@His-POP</b> catalyst                                                               | S23      |
| 20    | PXRD analysis of reused <b>Zn@His-POP</b> catalyst                                                                        | S24      |
| 21    | FT-IR spectrum of reused <b>Zn@His-POP</b> catalyst                                                                       | S25      |
| 22    | Different possible interaction configurations of <b>His-POP</b>                                                           | S26      |
| 23    | Cartesian coordinates of <b>Zn@His-POP</b> model and its complexes with CO <sub>2</sub>                                   | S27-S59  |
| 24    | References                                                                                                                | S60      |

## Materials and methods:

### 1. Materials:

4,4',4''-(1,3,5-triazine-2,4,6-triyl)trianiline (TRI), 2,5-dimethoxyterephthalaldehyde, L-Histidine, ZnCl<sub>2</sub>, N-methylaniline (NMA), phenylsilane (PhSiH<sub>3</sub>), 4,4'-bipiperidine, Piperidine, Morpholine, Piperazine were purchased from Sigma-Aldrich and TCI chemicals. 1,4-dioxane, N-Butanol, N, N-dimethylformamide (DMF), dichloroethane (DCE), Methanol (MeOH), Tetrahydrofuran (THF), Chloroform (CHCl<sub>3</sub>), Acetone, dimethyl sulfoxide (DMSO), acetonitrile (ACN), dimethylacetamide (DMAc), dichloromethane (DCM), Aqueous Acetic Acid (CH<sub>3</sub>COOH) and ethanol (EtOH) were purchased from Finar Chemicals and used without any further purification.

### Synthesis of T-POP:

In a 100 mL round-bottom flask, 4,4',4''-(1,3,5-triazine-2,4,6-triyl)trianiline (87 mg, 0.45 mmol) and 2,5-dimethoxyterephthalaldehyde (106 mg, 0.3 mmol) were dissolved in a solvent mixture of 1,4-dioxane, n-butanol, and methanol (12:12:3 ratio) and sonicated for uniform dispersion. The reaction mixture was then stirred at room temperature under a nitrogen (N<sub>2</sub>) atmosphere for 15 minutes, followed by the addition of 0.5 mL of aqueous acetic acid (6 M) and further stirring for a few minutes. The resulting mixture was transferred into a Teflon-lined autoclave, sealed, and heated in an oven at 80 °C for 2 days to facilitate polymerization. After completion, the reaction mixture was cooled, and the solid product was filtered, washed with ethanol and water, the resulting solid was further purified using a Soxhlet extractor with a mixed solvent of methanol, chloroform and acetone for 72 h. Finally, the purified precipitate was filtered and dried under vacuum at 80 °C to remove all solvent. This resulted in formation of T-POP.

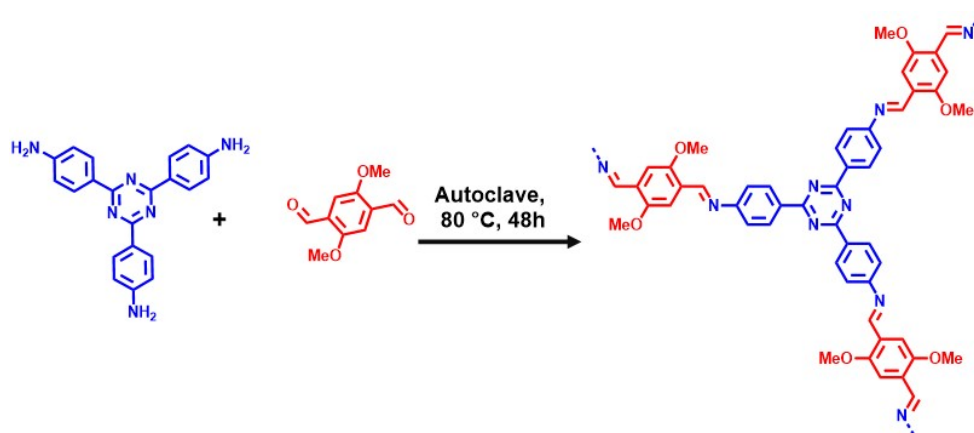

**Scheme S1:** Schematic representation of pristine T-POP synthesis.

### Synthesis of His-POP:

In a 100 mL round-bottom flask, 4,4',4''-(1,3,5-triazine-2,4,6-triyl)trianiline (87 mg, 0.45 mmol) and 2,5-dimethoxyterephthalaldehyde (106 mg, 0.3 mmol) were dissolved in a solvent mixture of 1,4-dioxane, n-butanol, and methanol (12:12:3 ratio) and sonicated for uniform dispersion. The reaction mixture was then stirred at room temperature under a nitrogen ( $N_2$ ) atmosphere for 15 minutes, followed by the addition of 0.5 mL of aqueous acetic acid (6 M) and further stirring for a few minutes. In a separate beaker, L-Histidine (47 mg, 0.3 mmol) was dissolved in 5 mL of aqueous acetic acid and added to the reaction mixture, which was then stirred for 1-2 h at room temperature under  $N_2$  atmosphere. The resulting mixture was transferred into a Teflon-lined autoclave, sealed, and heated in an oven at 80 °C for 2 days to facilitate polymerization. After completion, the reaction mixture was cooled, and the solid product was filtered, washed with ethanol and water, the resulting solid was further purified using a Soxhlet extractor with a mixed solvent of methanol, chloroform and acetone for 72 h. Finally, the purified precipitate was filtered and dried under vacuum at 80 °C to remove all solvent.

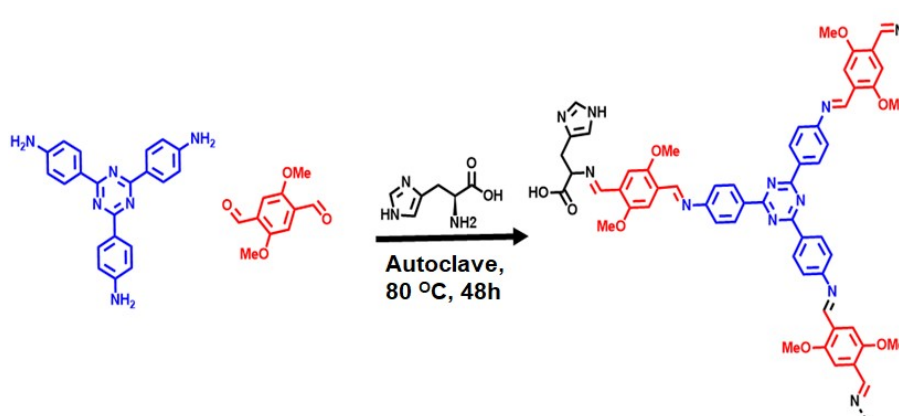

**Scheme S2:** Schematic representation of pristine **His-POP** synthesis.

### Incorporation of Zn-Metal active site in as-synthesized His-POP:

The Zn (II) metallic site was successfully anchored into the **His-POP** backbone by reacting with Zn (II) chloride. Initially, 30 mg of Zn (II) chloride ( $ZnCl_2$ ) was added to 100 mg of the as-synthesized **His-POP** in a round-bottom flask, to which 50-60 mL of ethanol was added. The resulting solution was then stirred for 9 h at 70 °C, after which it was filtered off. The final precipitate was dried under vacuum at 80 °C for 24 h and denoted as **Zn@His-POP**.

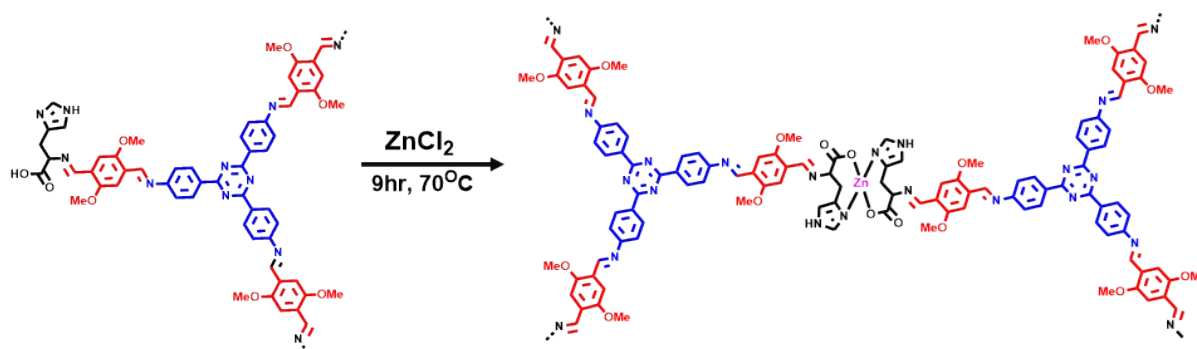

**Scheme S3:** Schematic representation of designing **Zn@His-POP** via embedding Zn-sites into the polymeric backbone.

## 2. Characterization Technique Details:

The powder X-ray diffraction (XRD) patterns were obtained using a Rigaku Miniflex X-ray diffractometer from Rigaku Corporation in Japan. These patterns were collected using Ni-filtered Cu K $\alpha$  radiation ( $\lambda = 1.5406 \text{ \AA}$ ) at a scan speed of  $2^\circ/\text{min}$  with a range of  $10$  to  $80^\circ$  at  $30 \text{ kV}$  and  $15 \text{ mA}$ .

FT-IR spectra of the catalysts were recorded on a DIGILAB IR spectrometer in the USA using the KBr disc method. Solid-state  $^{13}\text{C}$  CP MAS NMR studies were conducted on a Bruker Avance III HD  $400 \text{ MHz}$  NMR spectrometer.

Thermogravimetric analysis (TGA) of all samples was carried out using a TGA Instruments thermal analyzer TA-SDT Q-600 under a nitrogen atmosphere at a heating rate of  $10 \text{ }^\circ\text{C min}^{-1}$  from  $25$  to  $700 \text{ }^\circ\text{C}$ . Before conducting the TGA analysis, we kept the sample in a vacuum oven at  $80 \text{ }^\circ\text{C}$  for  $10 \text{ h}$ .

The catalyst's morphology was examined via scanning electron microscopy (SEM) using the FEI Verios 460L field-emission SEM (FE-SEM) equipped with an electron diffraction spectroscopy (EDS) detector for elemental mapping. Transmission electron microscopy (TEM) images were taken at  $100 \text{ kV}$  using a JEOL 1010 TEM.

The surface area was determined through the Brunauer-Emmett-Teller (BET) method. The average pore volume and pore size were measured by Non-local density functional theory (NLDFT) method. The BET surface area, pore volume and pore sizes were determined by using the  $\text{N}_2$  adsorption-desorption method using BEL Sorb II Instruments, Japan at liquid nitrogen temperature. Before the measurement the samples were degassed at  $130 \text{ }^\circ\text{C}$  for  $2 \text{ h}$ .

The low-pressure  $\text{CO}_2$  adsorption experiments were carried out using a Quantachrome iSorb-HP high-pressure gas sorption analyzer at  $273 \text{ K}$  and  $298 \text{ K}$ , up to  $1 \text{ bar}$ . Before the adsorption measurements, the samples underwent drying at  $110 \text{ }^\circ\text{C}$  for  $24 \text{ h}$ .

X-ray photoelectron spectroscopy (XPS) analysis was conducted using a Thermo Scientific K-Alpha instrument, utilizing monochromatic Al K $\alpha$  radiation with a photon energy of 1486.6 eV. To correct the binding energies (B.E) for both core levels and valence band maxima, an internal reference peak of the C 1s peak centred at 284.8 eV was employed.

Experiments were performed on the JNM-ECZ600R (JEOL Ltd.) at 14.1 T (600 MHz) solid-state NMR spectrometer equipped with a triple-channel  $^1\text{H}/^{13}\text{C}/^{14}\text{N}$  1 mm MAS probes at a MAS frequency of 70 kHz. The  $^{14}\text{N}$  and  $^{13}\text{C}$  edited experiments were recorded with a recycle delay of 5 and 5 Sec, respectively. The T-HMQC (TRAPDOR-heteronuclear multiple-quantum correlation) experiment was used to record 2D  $^1\text{H}$ - $^{14}\text{N}$  correlation spectra with 96 scans, for a total experimental time of approximately 7.5 h, corresponding to acquisition times of 5 ms and 0.8 ms in  $^1\text{H}$  and  $^{14}\text{N}$  dimensions, respectively. Two-proton-detected two-dimensional  $^1\text{H}$ - $^{13}\text{C}$  heteronuclear correlation spectra with a CP contact time of 100  $\mu\text{s}$  and 2 ms were recorded with 96 and 512 points, corresponding to acquisition times of 3.34 ms and 5 ms in the  $^{13}\text{C}$  and  $^1\text{H}$  dimensions, respectively.

**Product Analysis by Gas Chromatography (GC-FID):** All the reactants, products, and intermediates are confirmed and analysed by GC (Model QP 5050 supplied by M/S. Shimadzu Instruments Corporation, Japan) and GC (Shimadzu 2010), respectively. The GC is equipped with a flame ionization detector (FID) and an INNO Wax capillary column (diameter: 0.25 mm, length: 30 m) for separating the reaction mixtures. The product and reactant mixture, which was collected from the reactor, was added to the organic solvents (methanol or acetone), and an equal amount of an internal standard (anisole) was added before starting the GC analysis. The GC programming conditions are different for different reactions. The temperature of the injector is 250  $^\circ\text{C}$ , the temperature of the oven/column is usually 80-280  $^\circ\text{C}$  with the ramping rate of 10  $^\circ\text{C min}^{-1}$ , and the holding time is 3 and 5 minutes for the start and the end time of the analysis, respectively. The FID temperature is 300  $^\circ\text{C}$ .

#### **Computational details:**

All calculations were performed using Gaussian 16 Rev.C.01.<sup>1</sup> Geometries and frequencies optimizations were investigated using the unrestricted open-shell M06-2X functional<sup>2</sup> combined with the Ahlrichs family basis set def2-SVP.<sup>3,4</sup> The HOMO, LUMO distributions and ESP map of the **His-POP** and the **Zn@His-POP** complexes were analyzed by Chemcraft.<sup>5</sup> Charge density difference (CDD) map was visualized using the Multiwfn code.<sup>6</sup>

The interaction free energies ( $\Delta G_{\text{int}}$ ) between **His-POP** and **Zn@His-POP** complexes with the  $\text{CO}_2$  molecule were calculated *via* the following equation:

$$\Delta G_{\text{int}} = G(\text{CO}_2/\text{His-POP}) - G(\text{CO}_2) - G(\text{His-POP})$$

$$\Delta G_{\text{int}} = G(\text{CO}_2/\text{Zn@His-POP}) - G(\text{CO}_2) - G(\text{Zn@His-POP})$$

### Experimental Section:

#### Reaction condition screening of the synthesis of N-formylation products:

For the reductive N-formylation of amines using CO<sub>2</sub>, a 100 mL single-neck round-bottom flask was charged with N-methylaniline (1 mmol, 1 equiv.) and phenylsilane (2 mmol, 2 equiv.). Subsequently, the **Zn@His-POP** catalyst (20 mg) was added, followed by the addition of 5-10 mL of N, N-dimethylformamide (DMF) as the reaction medium. The mixture was stirred to achieve a homogeneous solution, then the flask was sealed with a septum. Carbon dioxide (CO<sub>2</sub>) gas was continuously purged into the reaction system at approximately 80 °C. The reaction was allowed to proceed for 12 h under sustained CO<sub>2</sub> flow to ensure optimal conversion.

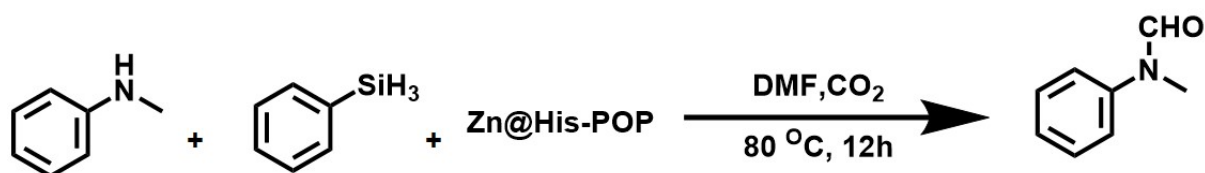

**Scheme S4:** Schematic representation of N-Formylation reaction by using **Zn@His-POP** as a Catalyst.

After the reaction was completed, the mixture was allowed to cool naturally to ambient temperature. The solid precipitate formed was then carefully isolated through vacuum filtration to ensure maximum recovery. To remove any unreacted substrates, byproducts, or residual solvent, the precipitate was thoroughly washed multiple times with DMF. The purified solid was subsequently dried under reduced pressure before being analyzed by <sup>1</sup>H and <sup>13</sup>C NMR spectroscopy, and gas chromatography-mass spectrometry (GC-MS) to confirm product formation and assess purity.

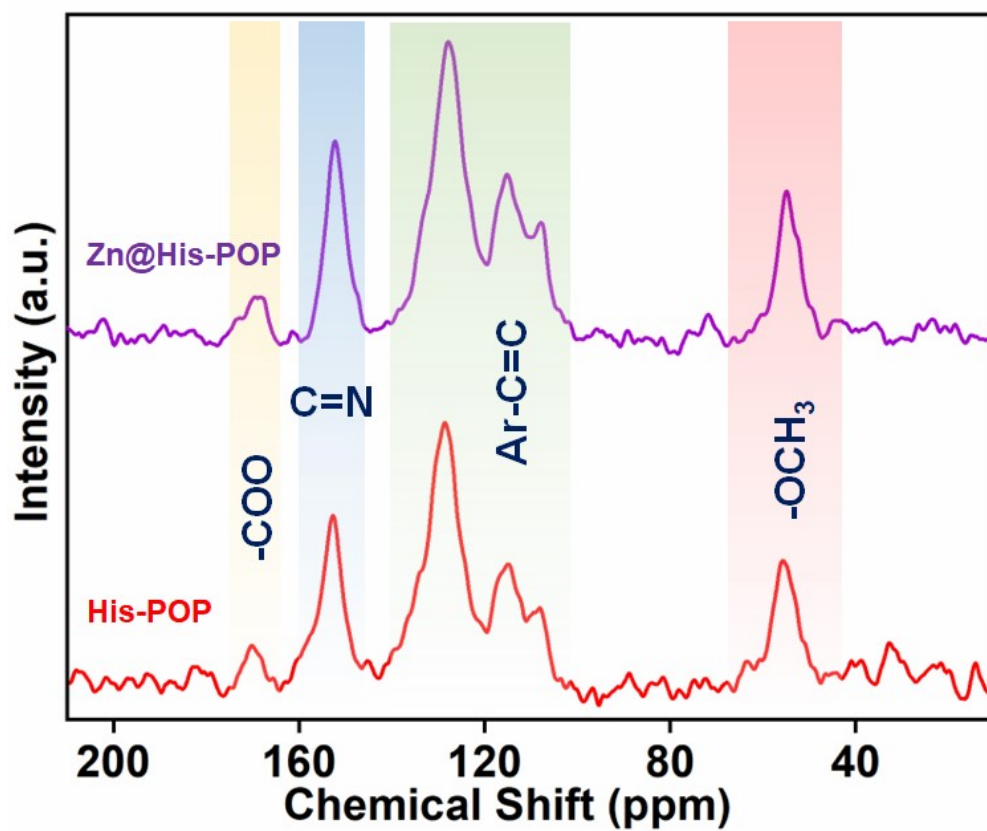

**Figure S1:**  $^{13}\text{C}$  cross polarization (CP) solid-state MAS NMR spectrum of **His-POP** and **Zn@His-POP** respectively.

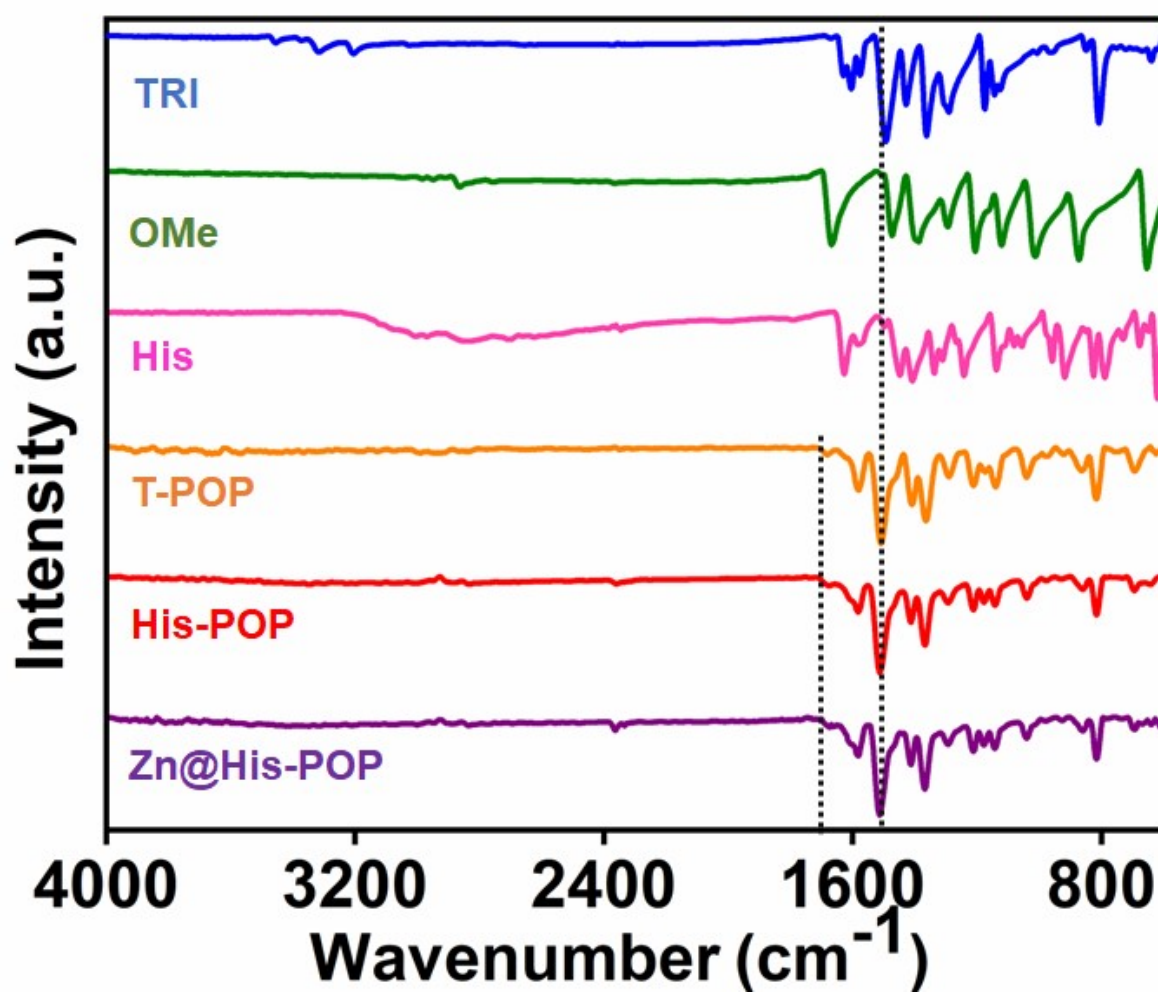

**Figure S2:** FT-IR analysis of the T-POP, His-POP and Zn@His-POP along with their respective monomer, respectively.

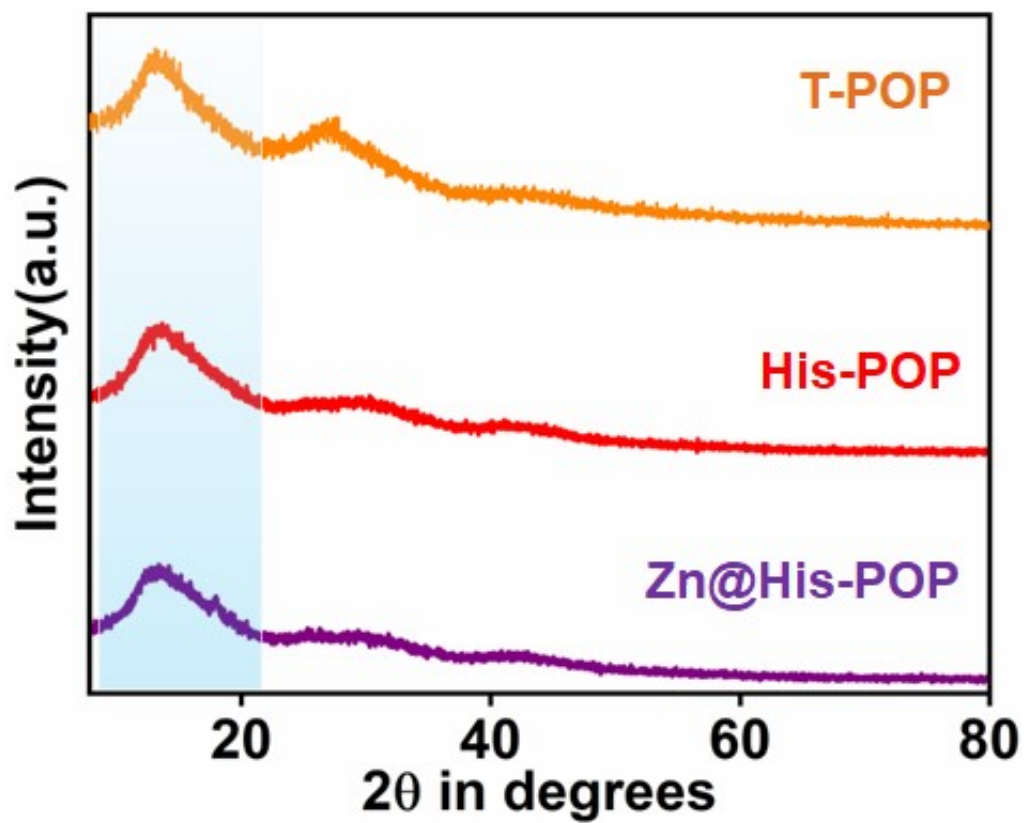

**Figure S3:** Wide angle Powder X-ray Diffraction (PXRD) pattern for the T-POP, His-POP and Zn@His-POP respectively.

**Table S1:** CHN analysis of **His-POP** and **Zn@His-POP**, respectively.

| <b>Elements in weight %</b> | <b>His-POP</b> | <b>Zn@His-POP</b> |
|-----------------------------|----------------|-------------------|
| <b>C</b>                    | 67.86          | 61.60             |
| <b>H</b>                    | 13.40          | 12.38             |
| <b>N</b>                    | 5.53           | 4.92              |

**Table S2: ICP-MS Analysis of Zn@His-POP.**

| <b>Sl. No</b> | <b>Sample Name</b>       | <b>Test Parameter</b> | <b>UOM</b> | <b>Result</b> |
|---------------|--------------------------|-----------------------|------------|---------------|
| 1.            | <b>Zn@His-POP</b>        | Zinc as Zn            | Wt.%       | 4.01          |
| 2.            | Reused <b>Zn@His-POP</b> | Zinc as Zn            | Wt.%       | 3.21          |

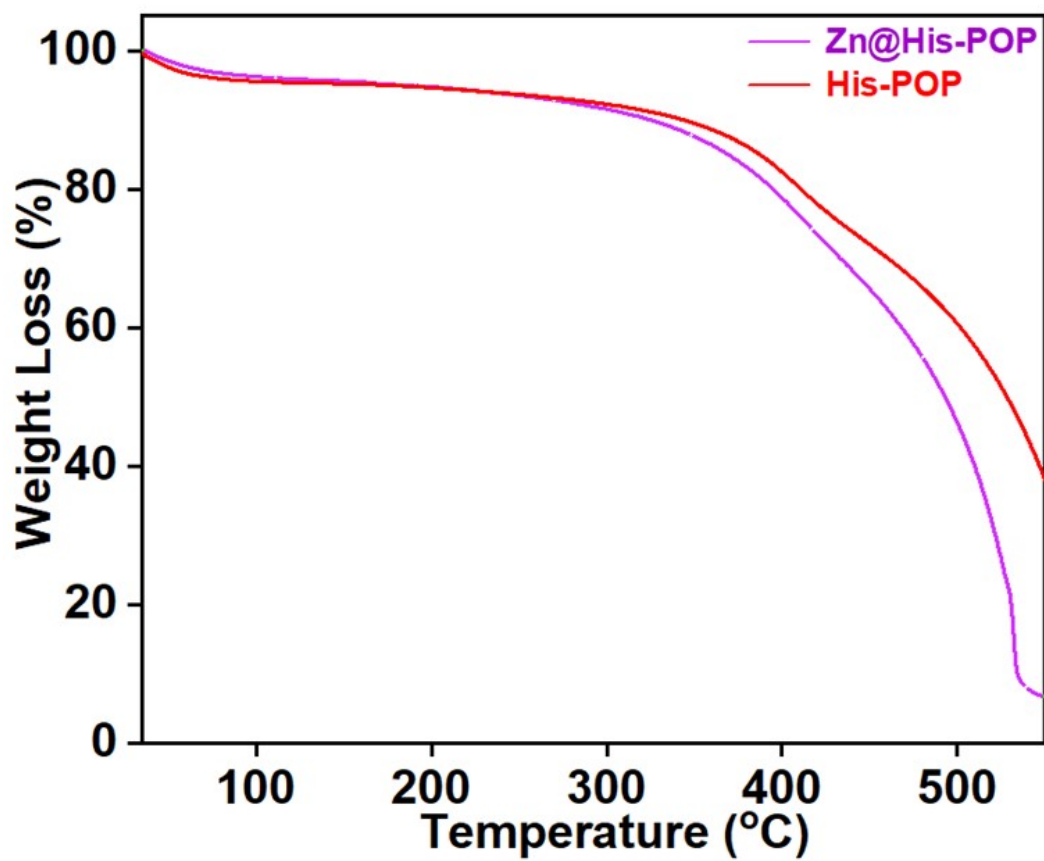

**Figure S4:** Thermogravimetric (TGA) analysis spectra of His-POP and Zn@His-POP, respectively

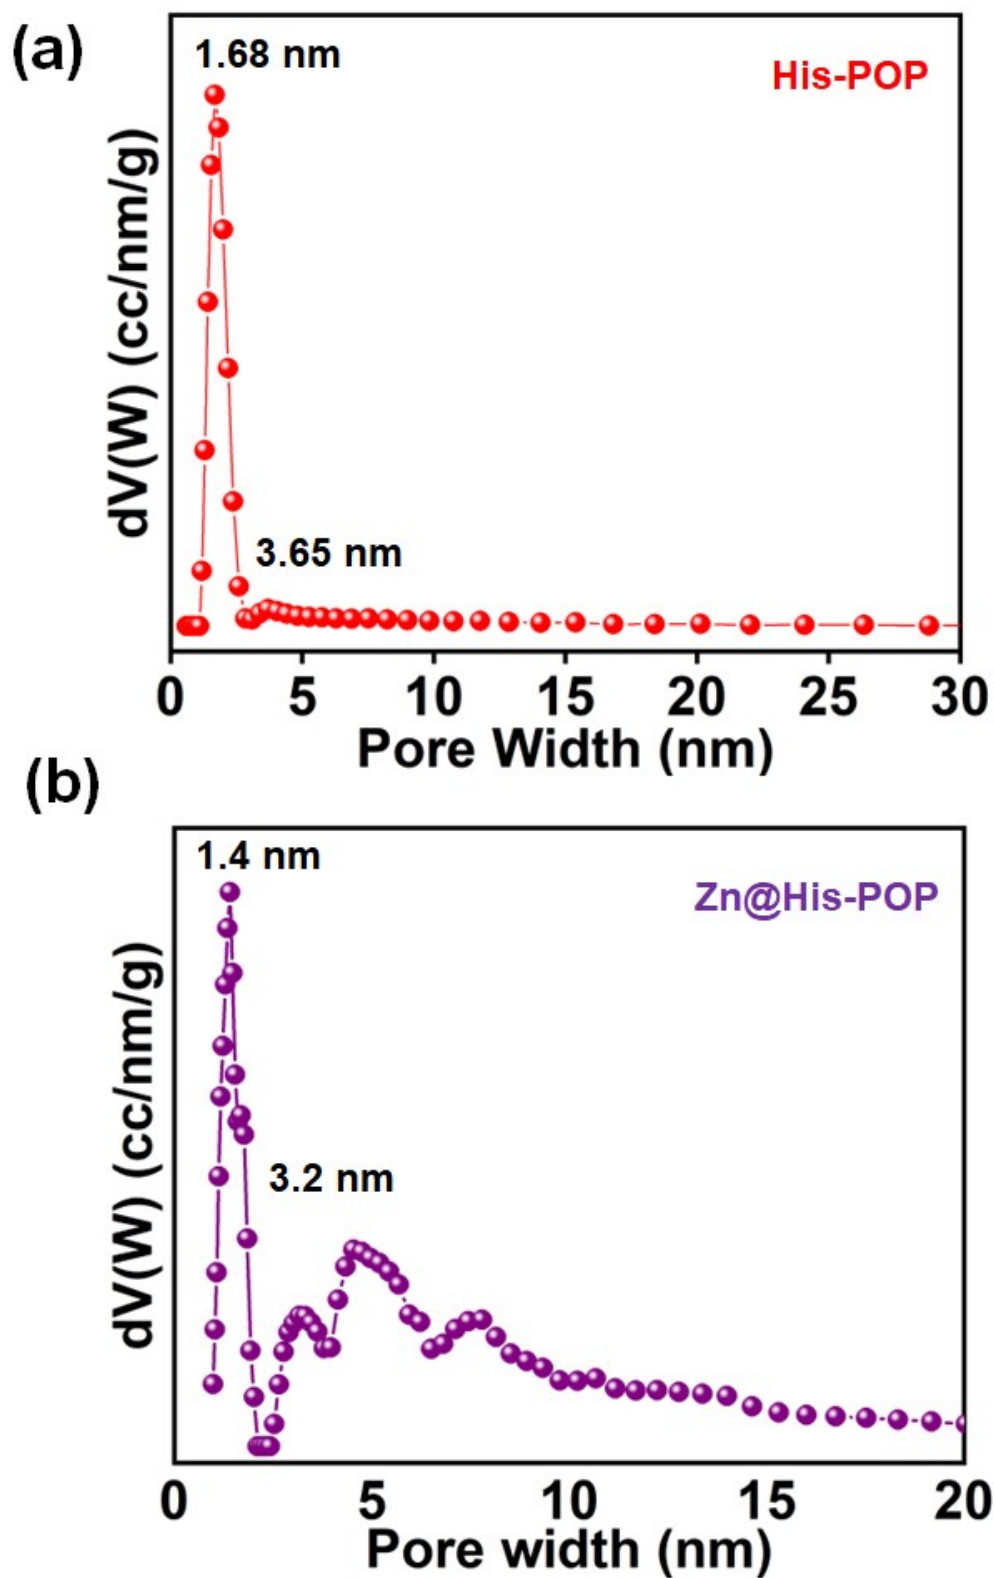

**Figure S5:** Pore-size distributions as calculated by NLDFT for His-POP (a) and Zn@His-POP (b), respectively.

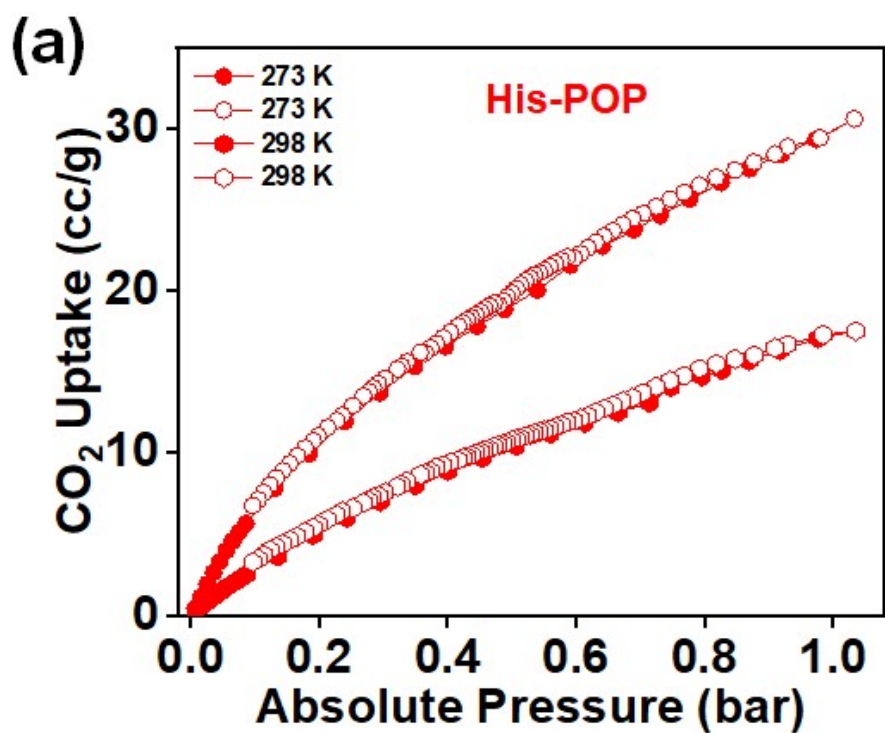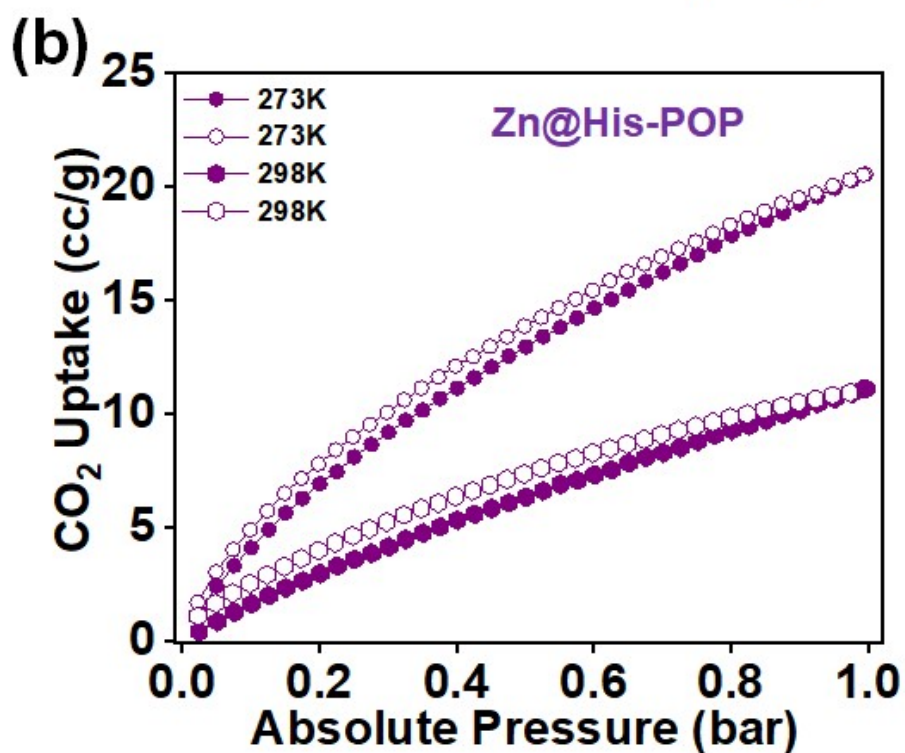

**Figure S6:** CO<sub>2</sub> Adsorption-Desorption isotherms analysis at 273 K and 298 K for His-POP (a) and Zn@His-POP (b), respectively.

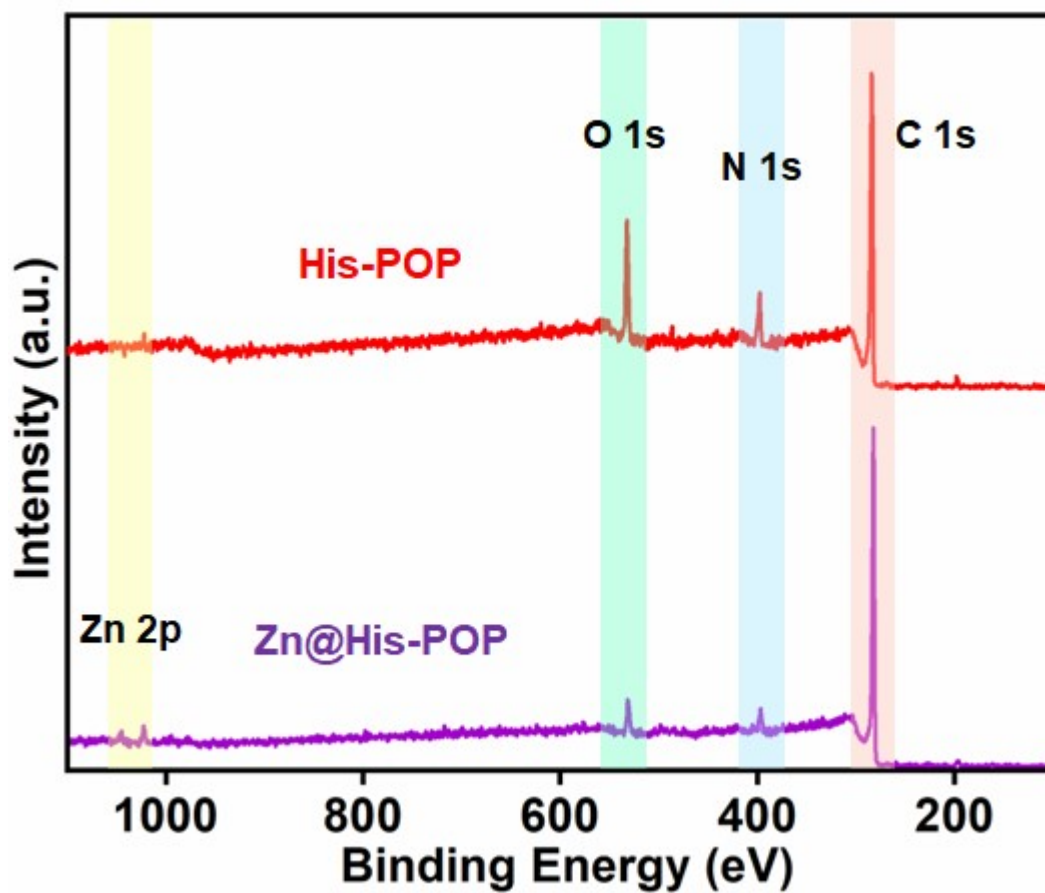

Figure S7: X-ray photoelectron survey spectrum of His-POP and Zn@His-POP respectively

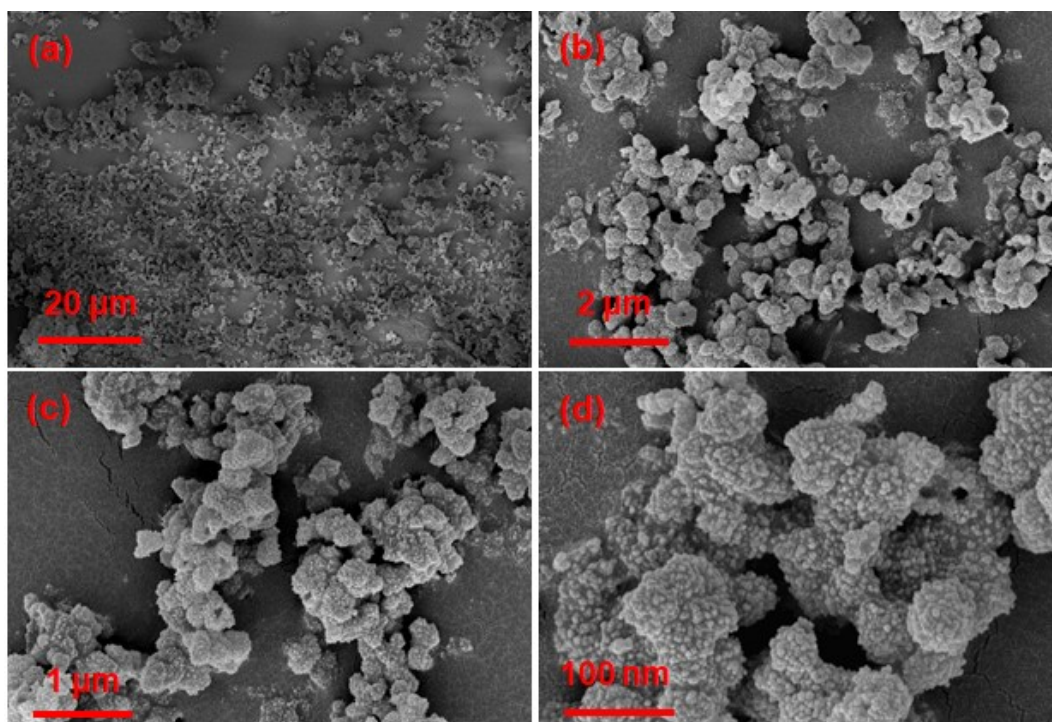

**Figure S8:** Field emission scanning electron microscopy (FE-SEM) images of **His-POP** (a-d), respectively.

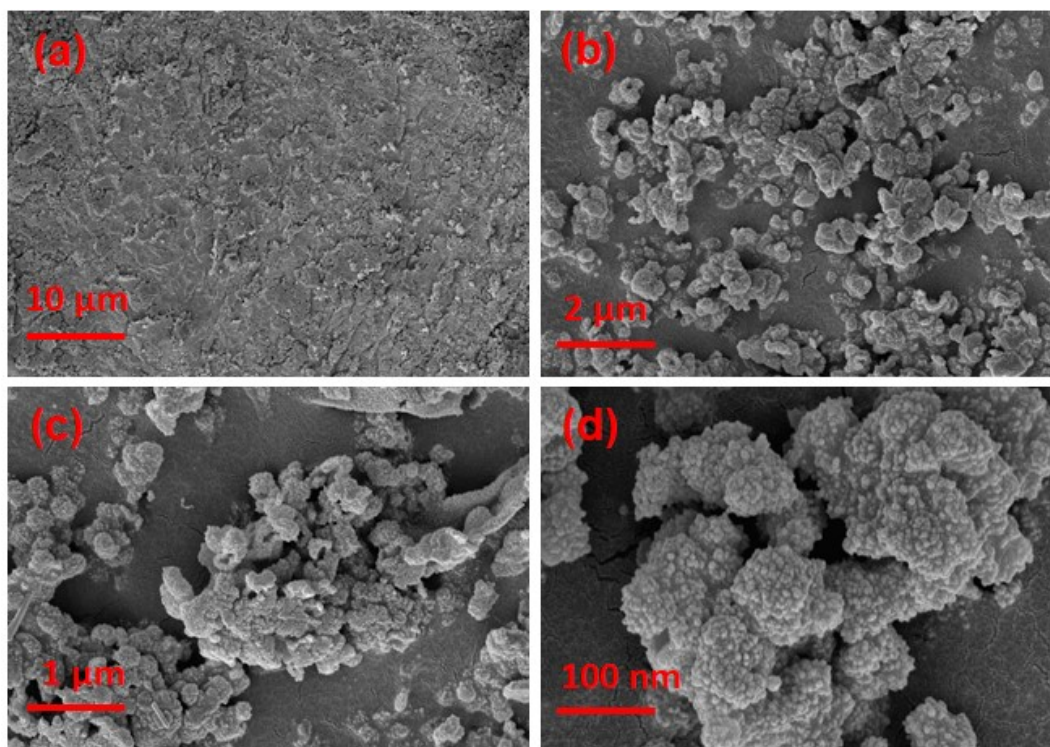

**Figure S9:** Field emission scanning electron microscopy (FE-SEM) images of Zn@His-POP (a-d), respectively.

**Table S3:** Parameters obtained after fitting the XAS data of **Zn@His-POP**.

| <b>Sample</b>     | <b>First Shell</b> | <b>Coordination Number (N)</b> | <b>R(Å)</b>   | <b><math>\sigma^2(10^{-2}\text{Å}^2)</math></b> | <b><math>\Delta E_0</math> (eV)</b> |
|-------------------|--------------------|--------------------------------|---------------|-------------------------------------------------|-------------------------------------|
| <b>Zn@His-POP</b> | <b>O1.1</b>        | <b>2</b>                       | <b>2.0167</b> | <b>0.187</b>                                    | <b>6.12</b>                         |
|                   | <b>N2.1</b>        | <b>2</b>                       | <b>1.5761</b> | <b>0.002</b>                                    | <b>-155.70</b>                      |

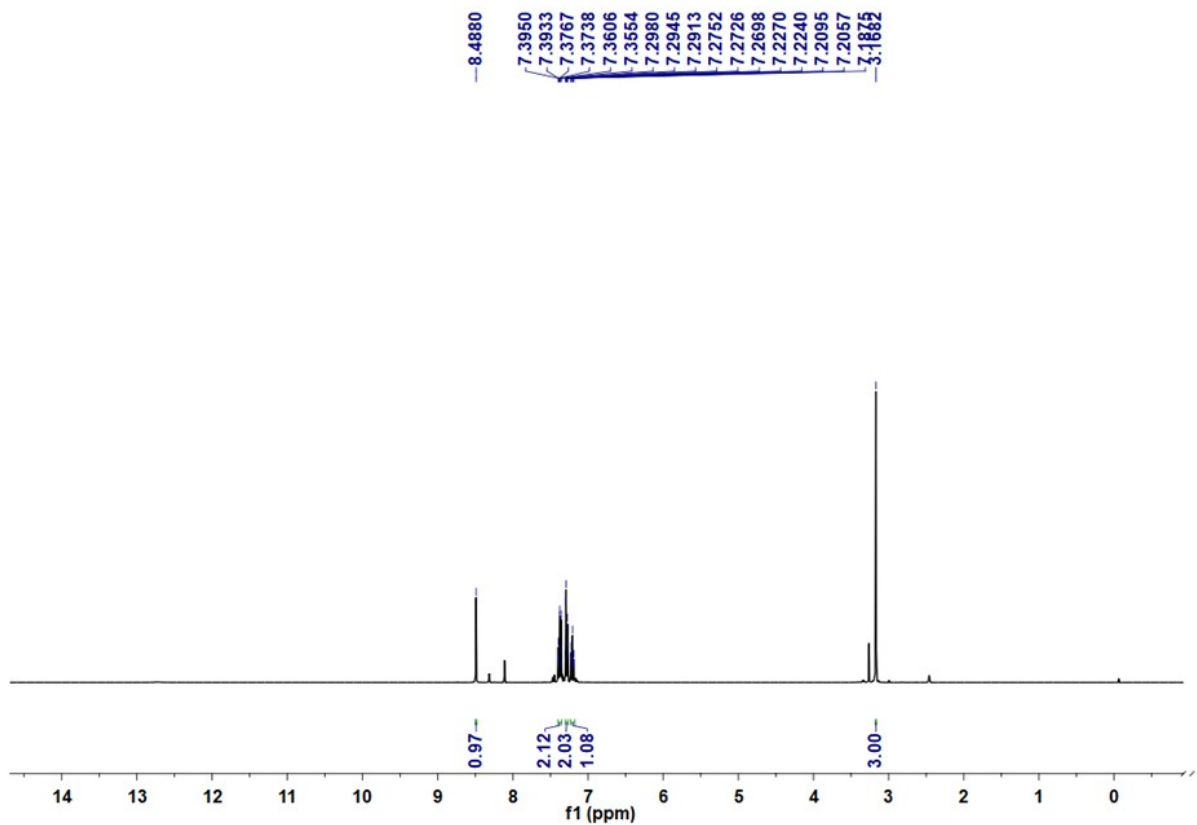

**Figure S10:**  $^1\text{H}$  NMR spectrum of **N-methyl-N-phenylformamide**.

$^1\text{H}$  NMR (400 MHz, DMSO)  $\delta$  8.49 (s), 7.40-7.35 (m), ( $J = 8.6, 1.3\text{Hz}$ ), 7.23-7.18(m), 3.17(s)

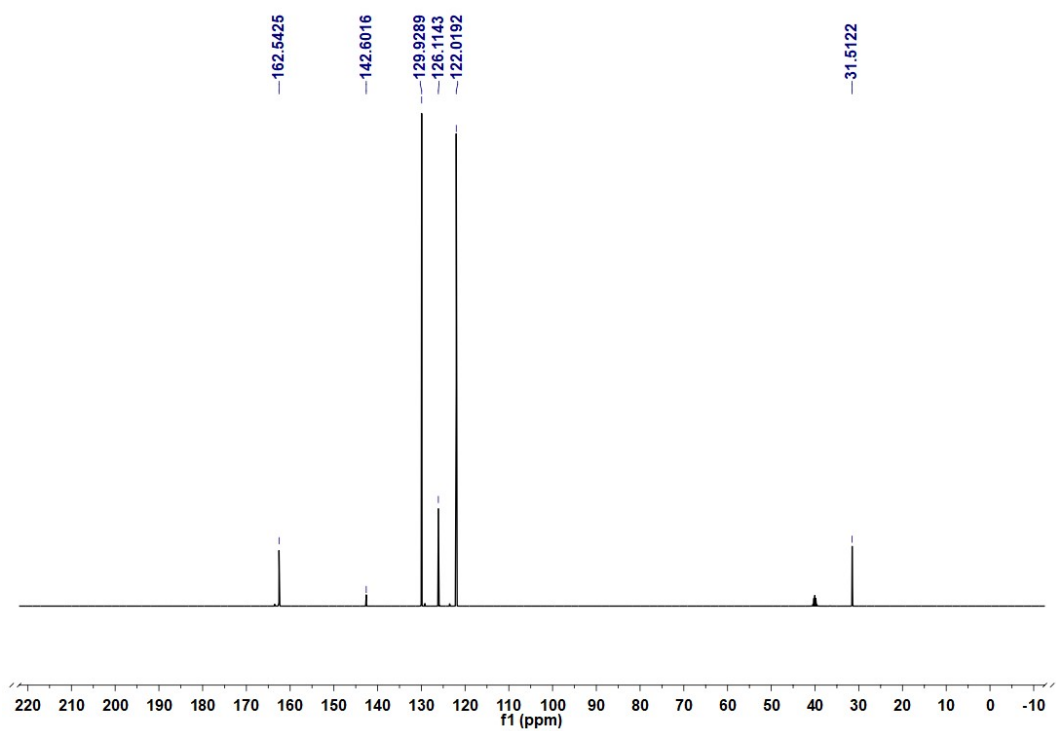

**Figure S11:**  $^{13}\text{C}$  NMR spectrum of **N-methyl-N-phenylformamide**.

$^{13}\text{C}$  NMR (101 MHz, DMSO)  $\delta$  162.54, 142.60, 129.93, 126.11, 122.02, 31.51

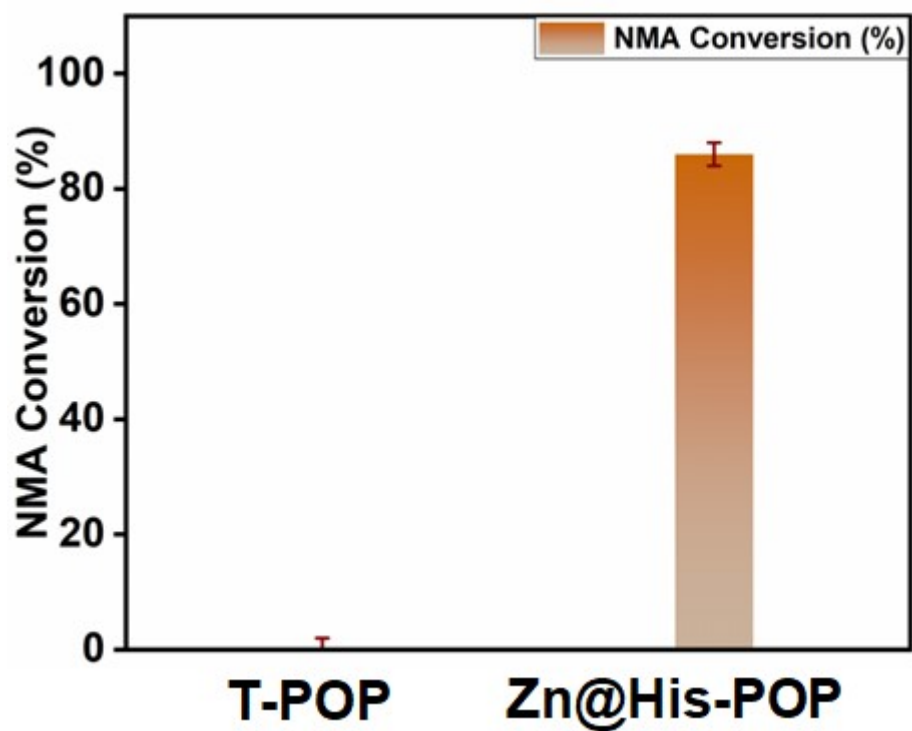

**Figure S12:** Comparison in the catalytic performance for N-formylation reaction with **T-POP** and **Zn@His-POP** respectively.

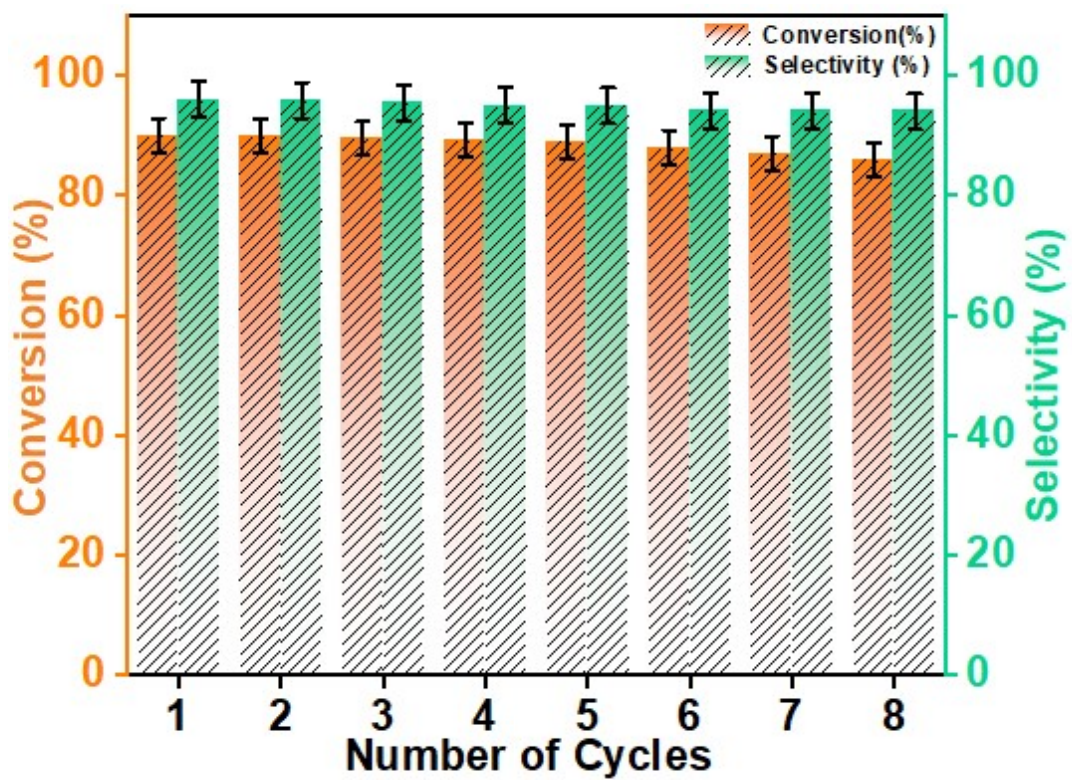

**Figure S13:** Reusability potential diagram of Zn@His-POP catalyst.

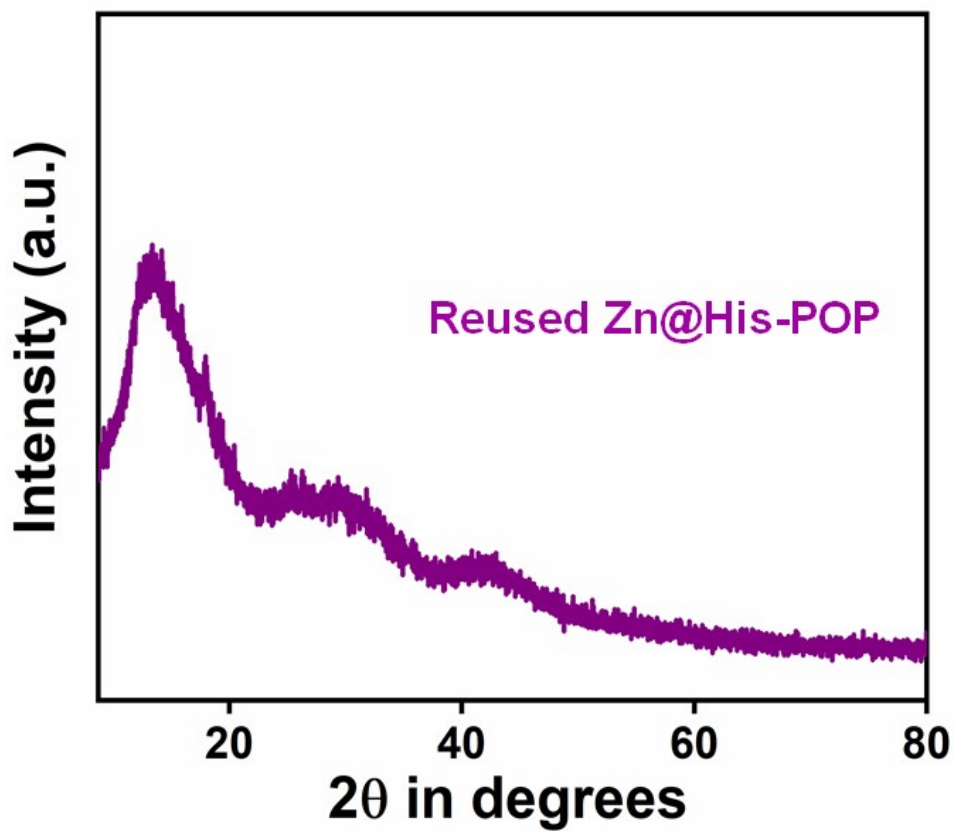

**Figure S14:** Wide angle Powder X-ray Diffraction (PXRD) pattern for the Reused Zn@His-POP catalyst..

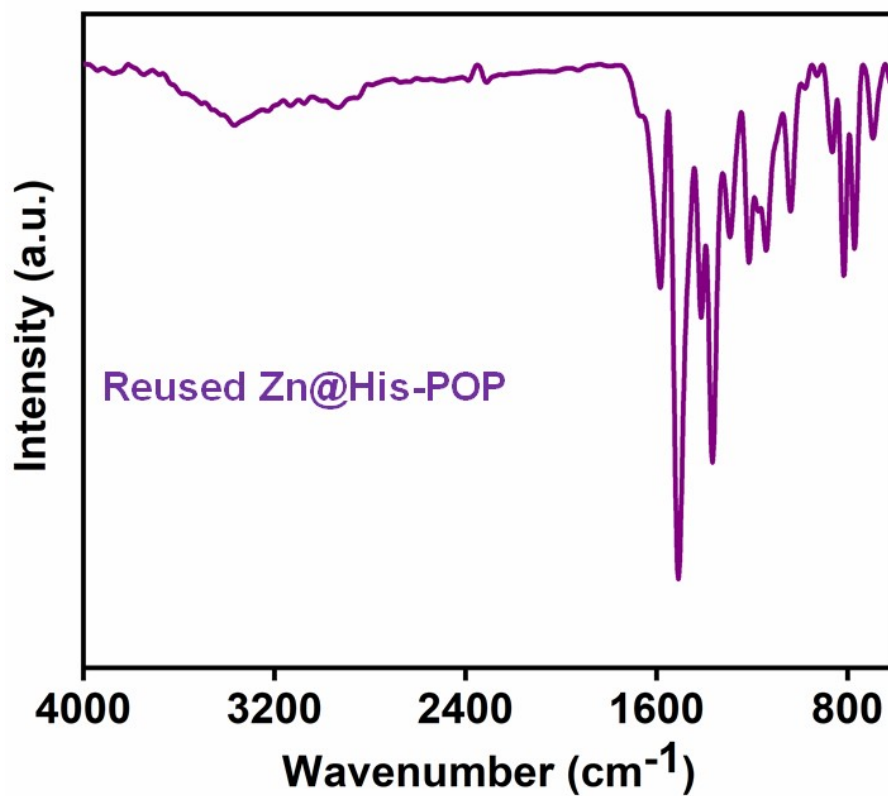

**Figure S15:** FT-IR spectrum of the reused Zn@His-POP catalyst.

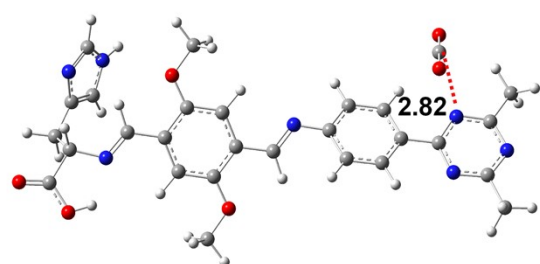

N8 (CO<sub>2</sub>/HisPOP-cp1),  $\Delta G_{\text{int}} = 10.0$

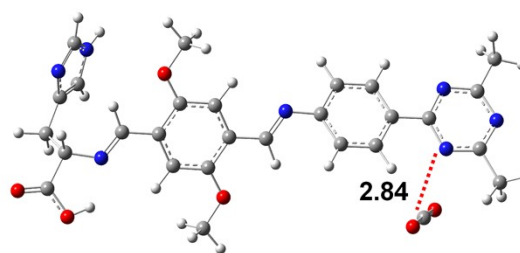

N6 (CO<sub>2</sub>/HisPOP-cp3),  $\Delta G_{\text{int}} = 11.8$

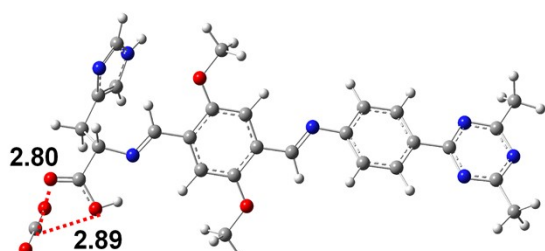

COO (CO<sub>2</sub>/HisPOP-cp2),  $\Delta G_{\text{int}} = 6.5$

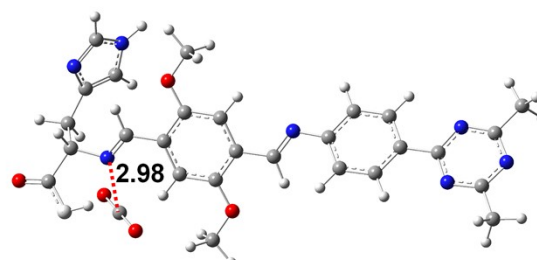

N32 (CO<sub>2</sub>/HisPOP-cp4),  $\Delta G_{\text{int}} = 3.9$

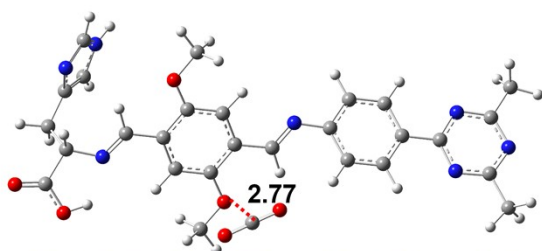

O33 (CO<sub>2</sub>/HisPOP-cp5),  $\Delta G_{\text{int}} = 8.1$

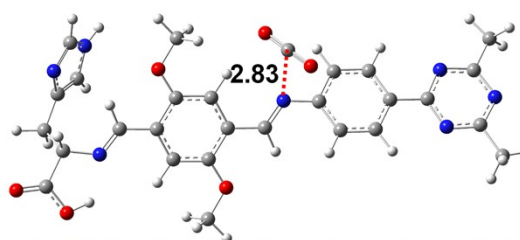

N19 (CO<sub>2</sub>/HisPOP-cp6),  $\Delta G_{\text{int}} = 2.9$

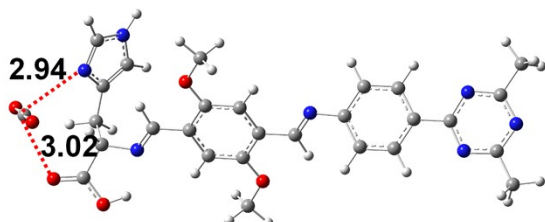

N57 (CO<sub>2</sub>/HisPOP-cp7),  $\Delta G_{\text{int}} = 9.4$

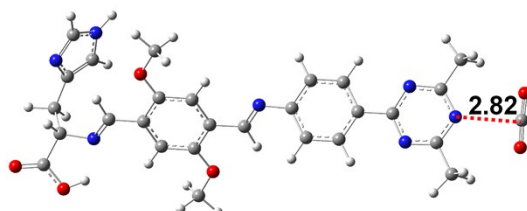

N42 (CO<sub>2</sub>/HisPOP-cp7),  $\Delta G_{\text{int}} = 15.1$

**Figure S16:** Eight possible interaction configurations of the His-POP with the CO<sub>2</sub> molecule at different active sites. All calculations were performed at the uM06-2X/def2-SVP level of theory. The Gibbs free energies of interaction ( $\Delta G_{\text{int}}$ , kcal/mol) were also mentioned.

**Table S4:** Cartesian coordinates and corresponding thermochemistry data for seven possible interactions of the **Zn@His-POP** polymer with the CO<sub>2</sub> molecule. All calculations were performed at the uM06-2X/def2-SVP level of theory. Values in parentheses are the relative enthalpies / relative free energies of each configuration compared to the most stable one (units are in kcal/mol).

| Cartesian coordinates                                                              |             |             |             | Optimized structure                                       |
|------------------------------------------------------------------------------------|-------------|-------------|-------------|-----------------------------------------------------------|
| <b>COO (7.6 / 3.3)</b>                                                             |             |             |             |                                                           |
| 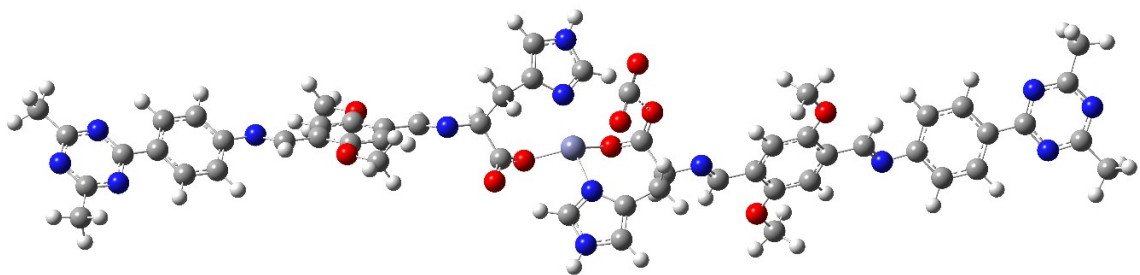 |             |             |             |                                                           |
| 0 1                                                                                |             |             |             | Zero-point correction= 1.033779 (Hartree/Particle)        |
| C                                                                                  | 19.35930800 | -1.94769700 | -0.47554500 | Thermal correction to Energy= 1.110368                    |
| N                                                                                  | 20.30673600 | -1.02303500 | -0.33969800 | Thermal correction to Enthalpy= 1.111313                  |
| C                                                                                  | 19.87744500 | 0.20464500  | -0.02600100 | Thermal correction to Gibbs Free Energy= 0.896412         |
| C                                                                                  | 17.71691800 | -0.46404800 | -0.00767000 | Sum of electronic and zero-point Energies= -5420.069485   |
| N                                                                                  | 18.05513900 | -1.71478700 | -0.31930900 | Sum of electronic and thermal Energies= -5419.992896      |
| N                                                                                  | 18.60173800 | 0.52899500  | 0.14861200  | Sum of electronic and thermal Enthalpies= -5419.991952    |
| C                                                                                  | 16.28082100 | -0.15135500 | 0.17530200  | Sum of electronic and thermal Free Energies= -5420.206853 |
| C                                                                                  | 15.87397900 | 1.14726600  | 0.51302000  |                                                           |
| C                                                                                  | 15.31568200 | -1.15477500 | 0.02555100  |                                                           |
| C                                                                                  | 14.52951500 | 1.43481100  | 0.69570000  |                                                           |
| H                                                                                  | 16.63453200 | 1.91807000  | 0.63593500  |                                                           |
| C                                                                                  | 13.96768000 | -0.86573400 | 0.19349500  |                                                           |
| H                                                                                  | 15.64551300 | -2.16454500 | -0.21859900 |                                                           |
| C                                                                                  | 13.55632400 | 0.43876000  | 0.51627700  |                                                           |
| H                                                                                  | 14.19767100 | 2.43625500  | 0.97085100  |                                                           |
| H                                                                                  | 13.22183000 | -1.65709100 | 0.10426800  |                                                           |
| N                                                                                  | 12.21431000 | 0.78242600  | 0.70867200  |                                                           |
| C                                                                                  | 11.32150500 | 0.30017900  | -0.06322400 |                                                           |
| H                                                                                  | 11.57462600 | -0.33931700 | -0.92406400 |                                                           |
| C                                                                                  | 9.89343500  | 0.58142400  | 0.13608700  |                                                           |
| C                                                                                  | 9.47820500  | 1.38020100  | 1.20753600  |                                                           |
| C                                                                                  | 8.93849200  | 0.04100800  | -0.74904100 |                                                           |
| C                                                                                  | 8.12782800  | 1.65124300  | 1.41317200  |                                                           |
| H                                                                                  | 10.25917200 | 1.77113200  | 1.85843100  |                                                           |
| C                                                                                  | 7.58695400  | 0.31307400  | -0.54195200 |                                                           |
| C                                                                                  | 7.17382200  | 1.11029300  | 0.52747800  |                                                           |
| H                                                                                  | 6.80161800  | -0.08215500 | -1.18539800 |                                                           |
| C                                                                                  | 5.73412000  | 1.37239500  | 0.72805300  |                                                           |
| H                                                                                  | 5.45954900  | 1.92106800  | 1.64481900  |                                                           |
| N                                                                                  | 4.87156600  | 0.97375900  | -0.11139800 |                                                           |
| O                                                                                  | 9.40422200  | -0.72747700 | -1.76083200 |                                                           |
| O                                                                                  | 7.65658700  | 2.41704200  | 2.42619700  |                                                           |
| C                                                                                  | 8.47289900  | -1.28395900 | -2.65377900 |                                                           |
| H                                                                                  | 7.76651500  | -1.95087500 | -2.13392700 |                                                           |
| H                                                                                  | 7.90221700  | -0.50049900 | -3.17795300 |                                                           |
| H                                                                                  | 9.04765900  | -1.86292800 | -3.38467100 |                                                           |
| C                                                                                  | 8.58052900  | 2.94457700  | 3.34193400  |                                                           |
| H                                                                                  | 8.00266300  | 3.51089700  | 4.08033900  |                                                           |
| H                                                                                  | 9.14036800  | 2.14517400  | 3.85415100  |                                                           |
| H                                                                                  | 9.29735400  | 3.61972600  | 2.84661300  |                                                           |
| C                                                                                  | 3.48136500  | 1.23595800  | 0.16120800  |                                                           |
| H                                                                                  | 3.32847100  | 1.84258500  | 1.07218700  |                                                           |
| C                                                                                  | 2.70862400  | -0.08721800 | 0.33191400  |                                                           |
| O                                                                                  | 1.73056000  | -0.02406500 | 1.16201800  |                                                           |
| O                                                                                  | 2.99327700  | -1.05387900 | -0.36366100 |                                                           |
| C                                                                                  | 2.89679800  | 1.96906400  | -1.06966500 |                                                           |
| H                                                                                  | 3.60520300  | 2.76446600  | -1.34051500 |                                                           |
| H                                                                                  | 2.88798000  | 1.25078200  | -1.90265200 |                                                           |

|    |              |             |             |
|----|--------------|-------------|-------------|
| C  | 1.55019400   | 2.61074700  | -0.91775400 |
| C  | 1.26413500   | 3.93700300  | -1.11889400 |
| N  | -0.08895300  | 4.07573900  | -0.91869000 |
| H  | 1.90699600   | 4.76853400  | -1.38793500 |
| C  | -0.59604100  | 2.87281900  | -0.60045500 |
| H  | -0.62394900  | 4.93177800  | -0.98668900 |
| H  | -1.64877100  | 2.66927200  | -0.37012600 |
| N  | 0.36706200   | 1.96759600  | -0.60068500 |
| Zn | -0.01358500  | 0.15867000  | 0.31175800  |
| C  | -19.56046800 | 1.55418500  | -0.86092800 |
| N  | -20.46434400 | 0.61641500  | -0.58773900 |
| C  | -19.98163200 | -0.52260500 | -0.07829500 |
| C  | -17.85648100 | 0.24861200  | -0.14722500 |
| N  | -18.24934000 | 1.41515000  | -0.65769500 |
| N  | -18.69495500 | -0.75029900 | 0.15739500  |
| C  | -16.41052200 | 0.04110500  | 0.09728900  |
| C  | -15.94900800 | -1.16550700 | 0.64232200  |
| C  | -15.49116500 | 1.05427900  | -0.20114300 |
| C  | -14.59608500 | -1.35328900 | 0.88234600  |
| H  | -16.67443100 | -1.94347800 | 0.87924100  |
| C  | -14.13410600 | 0.86276500  | 0.02460100  |
| H  | -15.86356700 | 1.99487600  | -0.60691900 |
| C  | -13.66770000 | -0.35174400 | 0.55604500  |
| H  | -14.22217800 | -2.28046800 | 1.31736200  |
| H  | -13.42500700 | 1.66575100  | -0.18252600 |
| N  | -12.31539400 | -0.59645100 | 0.81514000  |
| C  | -11.42934700 | -0.19978100 | -0.01133100 |
| H  | -11.69250900 | 0.28708200  | -0.96414100 |
| C  | -9.99519300  | -0.38724500 | 0.24632700  |
| C  | -9.56997300  | -0.99476100 | 1.43325500  |
| C  | -9.04521200  | 0.04573200  | -0.70090500 |
| C  | -8.21479200  | -1.18148000 | 1.69246300  |
| H  | -10.34745200 | -1.30980600 | 2.12794500  |
| C  | -7.68847900  | -0.14324700 | -0.44071800 |
| C  | -7.26584100  | -0.75193500 | 0.74259400  |
| H  | -6.90652600  | 0.17550000  | -1.12913300 |
| C  | -5.82222300  | -0.93776200 | 0.99263200  |
| H  | -5.54364100  | -1.30662500 | 1.99440400  |
| N  | -4.96080000  | -0.67918100 | 0.09951800  |
| O  | -9.52072900  | 0.63289800  | -1.82369800 |
| O  | -7.73395200  | -1.76489700 | 2.81660200  |
| C  | -8.59444400  | 1.08510700  | -2.77849600 |
| H  | -7.92112900  | 1.84767400  | -2.35522700 |
| H  | -7.98736100  | 0.25451400  | -3.17333700 |
| H  | -9.17659200  | 1.52709000  | -3.59431500 |
| C  | -8.65378100  | -2.17629700 | 3.79377400  |
| H  | -8.06894200  | -2.60036700 | 4.61721900  |
| H  | -9.24791200  | -1.32743400 | 4.16968700  |
| H  | -9.34009100  | -2.94497300 | 3.40236500  |
| C  | -3.56914000  | -0.85569100 | 0.42536200  |
| H  | -3.41684800  | -1.36088700 | 1.39745600  |
| C  | -2.84365300  | 0.50643400  | 0.47923300  |
| O  | -1.73596000  | 0.47528900  | 1.13525200  |
| O  | -3.29451200  | 1.46540300  | -0.12192800 |
| C  | -2.92812900  | -1.70211900 | -0.70594900 |
| H  | -3.66540800  | -2.46492900 | -0.99121400 |
| H  | -2.79604500  | -1.05135000 | -1.58532200 |
| C  | -1.65115800  | -2.41351400 | -0.38316100 |
| C  | -1.47143700  | -3.76559300 | -0.24020500 |
| N  | -0.13485500  | -3.94982000 | 0.02820700  |
| H  | -2.17478300  | -4.58852000 | -0.31275500 |
| C  | 0.46339200   | -2.74791400 | 0.04513300  |
| H  | 0.33449900   | -4.83482000 | 0.17168700  |
| H  | 1.52834600   | -2.56484000 | 0.20903700  |
| N  | -0.42404300  | -1.80225300 | -0.20980300 |
| C  | -20.97050100 | -1.60215800 | 0.24170800  |
| H  | -21.52051400 | -1.87641000 | -0.66910100 |
| H  | -20.45982400 | -2.47857900 | 0.65244000  |
| H  | -21.70821700 | -1.22129400 | 0.96137600  |
| C  | -20.03353700 | 2.85557400  | -1.43462800 |
| H  | -19.72990700 | 3.67993700  | -0.77472500 |
| H  | -19.55117400 | 3.02506400  | -2.40721100 |
| H  | -21.12172700 | 2.84592300  | -1.55021800 |
| C  | 19.77159400  | -3.34566500 | -0.82519700 |
| H  | 19.43936200  | -4.03428700 | -0.03593300 |

|                                                                                    |              |             |             |                                                           |
|------------------------------------------------------------------------------------|--------------|-------------|-------------|-----------------------------------------------------------|
| H                                                                                  | 19.27382100  | -3.65434000 | -1.75470600 |                                                           |
| H                                                                                  | 20.85829700  | -3.40289600 | -0.94097900 |                                                           |
| C                                                                                  | 20.91634900  | 1.27282700  | 0.13338700  |                                                           |
| H                                                                                  | 20.44824800  | 2.22315000  | 0.40794200  |                                                           |
| H                                                                                  | 21.63988100  | 0.96889900  | 0.90219400  |                                                           |
| H                                                                                  | 21.47326300  | 1.38417000  | -0.80737300 |                                                           |
| C                                                                                  | 1.51178700   | -1.44244600 | -2.53750400 |                                                           |
| O                                                                                  | 1.11084400   | -0.35808000 | -2.44322500 |                                                           |
| O                                                                                  | 1.86734600   | -2.53158800 | -2.67971900 |                                                           |
| <b>Zn (5.7 / 14.5)</b>                                                             |              |             |             |                                                           |
| 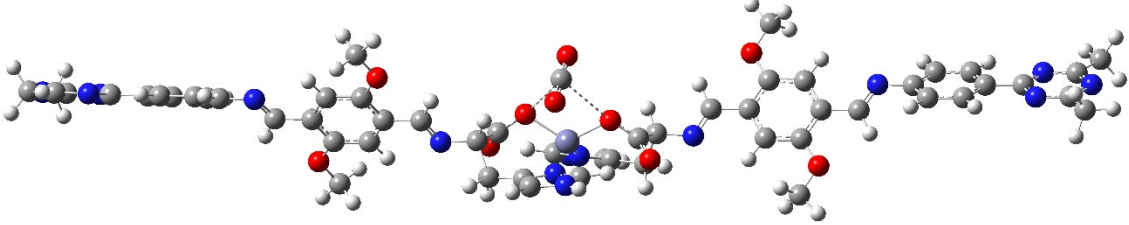 |              |             |             |                                                           |
| O 1                                                                                |              |             |             | Zero-point correction= 1.033733 (Hartree/Particle)        |
| C                                                                                  | -19.29599000 | -2.15420200 | -0.75942200 | Thermal correction to Energy= 1.109516                    |
| N                                                                                  | -20.22478800 | -1.22766200 | -0.98282300 | Thermal correction to Enthalpy= 1.110461                  |
| C                                                                                  | -19.76751400 | 0.01116100  | -1.19748600 | Thermal correction to Gibbs Free Energy= 0.900560         |
| C                                                                                  | -17.61758700 | -0.65140800 | -0.96451400 | Sum of electronic and zero-point Energies= -5420.069421   |
| N                                                                                  | -17.98413200 | -1.91292800 | -0.74086300 | Sum of electronic and thermal Energies= -5419.993637      |
| N                                                                                  | -18.48218200 | 0.34440200  | -1.19767000 | Sum of electronic and thermal Enthalpies= -5419.992693    |
| C                                                                                  | -16.17197800 | -0.32922600 | -0.95397900 | Sum of electronic and thermal Free Energies= -5420.202594 |
| C                                                                                  | -15.73435400 | 0.98086200  | -1.19512100 |                                                           |
| C                                                                                  | -15.22685000 | -1.33472400 | -0.71659100 |                                                           |
| C                                                                                  | -14.37948200 | 1.27736400  | -1.19805500 |                                                           |
| H                                                                                  | -16.47834600 | 1.75358500  | -1.38754600 |                                                           |
| C                                                                                  | -13.87029200 | -1.03715400 | -0.70406300 |                                                           |
| H                                                                                  | -15.57820700 | -2.35282200 | -0.54910000 |                                                           |
| C                                                                                  | -13.43012300 | 0.27812200  | -0.93043400 |                                                           |
| H                                                                                  | -14.02214500 | 2.28811500  | -1.39659500 |                                                           |
| H                                                                                  | -13.13636600 | -1.82923700 | -0.54767800 |                                                           |
| N                                                                                  | -12.07678200 | 0.63064000  | -0.94268100 |                                                           |
| C                                                                                  | -11.28447100 | 0.12765500  | -0.07974100 |                                                           |
| H                                                                                  | -11.63946700 | -0.53769200 | 0.72362500  |                                                           |
| C                                                                                  | -9.84434100  | 0.41786700  | -0.09133600 |                                                           |
| C                                                                                  | -9.30343800  | 1.24551500  | -1.08164200 |                                                           |
| C                                                                                  | -9.00420100  | -0.14252500 | 0.89230600  |                                                           |
| C                                                                                  | -7.93960800  | 1.52540200  | -1.10998200 |                                                           |
| H                                                                                  | -9.99934000  | 1.65108200  | -1.81486700 |                                                           |
| C                                                                                  | -7.63901000  | 0.13859500  | 0.86299300  |                                                           |
| C                                                                                  | -7.10037500  | 0.96434900  | -0.12593500 |                                                           |
| H                                                                                  | -6.93799700  | -0.26964300 | 1.59032200  |                                                           |
| C                                                                                  | -5.64927300  | 1.23856600  | -0.13813900 |                                                           |
| H                                                                                  | -5.26898200  | 1.82023200  | -0.99477200 |                                                           |
| N                                                                                  | -4.89222900  | 0.81604300  | 0.78728900  |                                                           |
| O                                                                                  | -9.58851700  | -0.93741400 | 1.81872600  |                                                           |
| O                                                                                  | -7.35027500  | 2.31826600  | -2.03653000 |                                                           |
| C                                                                                  | -8.77300600  | -1.51494100 | 2.80634000  |                                                           |
| H                                                                                  | -8.00414300  | -2.16704800 | 2.36171800  |                                                           |
| H                                                                                  | -8.27563300  | -0.74433900 | 3.41712500  |                                                           |
| H                                                                                  | -9.43146100  | -2.11351000 | 3.44506100  |                                                           |
| C                                                                                  | -8.15602400  | 2.86945200  | -3.04530000 |                                                           |
| H                                                                                  | -7.49375300  | 3.45674100  | -3.69054300 |                                                           |
| H                                                                                  | -8.64391000  | 2.08354600  | -3.64457400 |                                                           |
| H                                                                                  | -8.93214000  | 3.52952700  | -2.62465300 |                                                           |
| C                                                                                  | -3.48446000  | 1.10439600  | 0.69673000  |                                                           |
| H                                                                                  | -3.22532700  | 1.72741200  | -0.17855600 |                                                           |
| C                                                                                  | -2.66320500  | -0.19696800 | 0.63731600  |                                                           |
| O                                                                                  | -1.59699200  | -0.11773100 | -0.08584100 |                                                           |
| O                                                                                  | -2.98498500  | -1.14431800 | 1.33568600  |                                                           |
| C                                                                                  | -3.06167400  | 1.83132800  | 1.99829700  |                                                           |
| H                                                                                  | -3.81732300  | 2.60158600  | 2.20562300  |                                                           |
| H                                                                                  | -3.11612800  | 1.09612100  | 2.81595200  |                                                           |
| C                                                                                  | -1.72632500  | 2.50815600  | 1.96514400  |                                                           |
| C                                                                                  | -1.50068500  | 3.85913600  | 2.00667000  |                                                           |
| N                                                                                  | -0.13766400  | 4.02320000  | 1.94893000  |                                                           |
| H                                                                                  | -2.19153400  | 4.69274100  | 2.07503900  |                                                           |
| C                                                                                  | 0.43215700   | 2.81119400  | 1.86923800  |                                                           |

|    |              |             |             |
|----|--------------|-------------|-------------|
| H  | 0.36399900   | 4.90169100  | 1.93975400  |
| H  | 1.50687900   | 2.63048000  | 1.75761900  |
| N  | -0.49967100  | 1.87241100  | 1.89128300  |
| Zn | 0.01769700   | 0.09334300  | 0.97029000  |
| C  | 19.44176000  | 1.41893900  | -0.80099900 |
| N  | 20.29832800  | 0.43637400  | -1.06917900 |
| C  | 19.75034900  | -0.75936900 | -1.31369100 |
| C  | 17.65719500  | 0.04638300  | -1.02207800 |
| N  | 18.11642100  | 1.27094800  | -0.76641000 |
| N  | 18.44465900  | -1.00029300 | -1.30114400 |
| C  | 16.19270800  | -0.17326400 | -0.99524600 |
| C  | 15.66010500  | -1.44118700 | -1.26875700 |
| C  | 15.32460900  | 0.88768300  | -0.70967900 |
| C  | 14.28793500  | -1.64200700 | -1.25597900 |
| H  | 16.34471800  | -2.25735500 | -1.49853300 |
| C  | 13.95076200  | 0.68535600  | -0.68139300 |
| H  | 15.74916600  | 1.87294300  | -0.51708200 |
| C  | 13.41563300  | -0.58813500 | -0.94008800 |
| H  | 13.85711200  | -2.61837000 | -1.47919300 |
| H  | 13.27711500  | 1.52134100  | -0.48684300 |
| N  | 12.04123400  | -0.84672900 | -0.93781600 |
| C  | 11.29839900  | -0.31761700 | -0.04699800 |
| H  | 11.70933000  | 0.29937000  | 0.76822600  |
| C  | 9.84240700   | -0.51432100 | -0.03985100 |
| C  | 9.23317400   | -1.27808200 | -1.04177600 |
| C  | 9.05666100   | 0.06921100  | 0.97480300  |
| C  | 7.85432800   | -1.47261400 | -1.05060900 |
| H  | 9.88891800   | -1.70525700 | -1.79931200 |
| C  | 7.67639000   | -0.12714000 | 0.96548200  |
| C  | 7.06989200   | -0.89038700 | -0.03431100 |
| H  | 7.01559500   | 0.30331200  | 1.71721300  |
| C  | 5.60498500   | -1.07659400 | -0.02347700 |
| H  | 5.17118000   | -1.59444600 | -0.89548500 |
| N  | 4.89623700   | -0.65257900 | 0.93884800  |
| O  | 9.70554700   | 0.80113200  | 1.90993400  |
| O  | 7.20005000   | -2.20117800 | -1.98619300 |
| C  | 8.94456200   | 1.40185400  | 2.92702000  |
| H  | 8.20942300   | 2.11071300  | 2.51338600  |
| H  | 8.41173800   | 0.64744900  | 3.52806000  |
| H  | 9.64971600   | 1.94247500  | 3.56751500  |
| C  | 7.95020600   | -2.76412800 | -3.03075900 |
| H  | 7.24056900   | -3.28806300 | -3.68016400 |
| H  | 8.47217500   | -1.98824700 | -3.61414600 |
| H  | 8.69363900   | -3.48342700 | -2.65003600 |
| C  | 3.46981700   | -0.84471700 | 0.86975100  |
| H  | 3.16124500   | -1.44661500 | -0.00447500 |
| C  | 2.75445400   | 0.52413900  | 0.79562800  |
| O  | 1.68115400   | 0.52936900  | 0.07684300  |
| O  | 3.17596700   | 1.45679300  | 1.45548000  |
| C  | 3.02626200   | -1.54258100 | 2.18022800  |
| H  | 3.79770300   | -2.28147000 | 2.43665500  |
| H  | 3.03640000   | -0.78519600 | 2.98023200  |
| C  | 1.71563500   | -2.26555600 | 2.13747400  |
| C  | 1.50642900   | -3.59971200 | 2.37404100  |
| N  | 0.15392900   | -3.80872000 | 2.23600000  |
| H  | 2.20129000   | -4.39367900 | 2.62649800  |
| C  | -0.42731900  | -2.63987500 | 1.92223500  |
| H  | -0.33227400  | -4.69014100 | 2.33995000  |
| H  | -1.49314400  | -2.48191500 | 1.72387600  |
| N  | 0.48897600   | -1.68810500 | 1.86425600  |
| C  | 20.68443900  | -1.88995400 | -1.62186500 |
| H  | 21.39581000  | -2.01413000 | -0.79395400 |
| H  | 20.12372200  | -2.81600000 | -1.78202200 |
| H  | 21.27183000  | -1.64461500 | -2.51761000 |
| C  | 19.98904500  | 2.78599000  | -0.52135900 |
| H  | 19.61238800  | 3.49201000  | -1.27473000 |
| H  | 19.62984800  | 3.13406900  | 0.45663900  |
| H  | 21.08309100  | 2.76768800  | -0.53997500 |
| C  | -19.73991900 | -3.56420900 | -0.51176600 |
| H  | -19.29548700 | -4.22702400 | -1.26708500 |
| H  | -19.37275600 | -3.89839900 | 0.46839500  |
| H  | -20.83167100 | -3.63010200 | -0.54835600 |
| C  | -20.78489000 | 1.08097800  | -1.45463100 |
| H  | -20.29421500 | 2.04889700  | -1.59598800 |
| H  | -21.37096400 | 0.82081800  | -2.34703500 |

|                                                                                    |              |             |             |                                                           |
|------------------------------------------------------------------------------------|--------------|-------------|-------------|-----------------------------------------------------------|
| H                                                                                  | -21.48685600 | 1.12979500  | -0.61094600 |                                                           |
| C                                                                                  | -0.22310100  | 1.65436900  | -1.76987200 |                                                           |
| O                                                                                  | 0.03210700   | 0.82146800  | -2.52580900 |                                                           |
| O                                                                                  | -0.48369300  | 2.52200400  | -1.04481000 |                                                           |
| <b>N32 (0.0 / 0.0)</b>                                                             |              |             |             |                                                           |
| 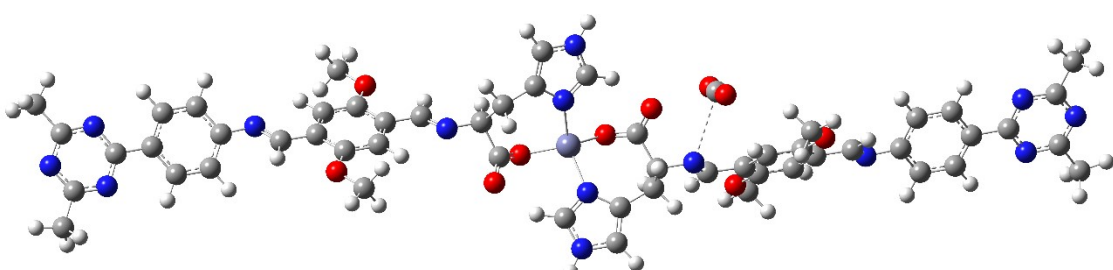 |              |             |             |                                                           |
| 0 1                                                                                |              |             |             | Zero-point correction= 1.034040 (Hartree/Particle)        |
| C                                                                                  | -19.72827900 | -1.68950300 | -0.27575600 | Thermal correction to Energy= 1.110526                    |
| N                                                                                  | -20.61358300 | -0.72381400 | -0.50967300 | Thermal correction to Enthalpy= 1.111470                  |
| C                                                                                  | -20.09871200 | 0.47395600  | -0.80988400 | Thermal correction to Gibbs Free Energy= 0.898213         |
| C                                                                                  | -17.98035200 | -0.29829300 | -0.63166600 | Sum of electronic and zero-point Energies= -5420.072300   |
| N                                                                                  | -18.40553000 | -1.52347700 | -0.32525300 | Sum of electronic and thermal Energies= -5419.995815      |
| N                                                                                  | -18.79826800 | 0.73219400  | -0.88193200 | Sum of electronic and thermal Enthalpies= -5419.994871    |
| C                                                                                  | -16.52024600 | -0.05885300 | -0.69868700 | Sum of electronic and thermal Free Energies= -5420.208127 |
| C                                                                                  | -16.02354600 | 1.21066700  | -1.02659700 |                                                           |
| C                                                                                  | -15.62126000 | -1.10277100 | -0.44803400 |                                                           |
| C                                                                                  | -14.65612400 | 1.42990600  | -1.10088600 |                                                           |
| H                                                                                  | -16.73253800 | 2.01326100  | -1.22859500 |                                                           |
| C                                                                                  | -14.25128500 | -0.88179800 | -0.50731000 |                                                           |
| H                                                                                  | -16.01924100 | -2.08980400 | -0.21258900 |                                                           |
| C                                                                                  | -13.75118600 | 0.39373800  | -0.82018000 |                                                           |
| H                                                                                  | -14.25369900 | 2.40766100  | -1.36689200 |                                                           |
| H                                                                                  | -13.55519800 | -1.70510900 | -0.33961100 |                                                           |
| N                                                                                  | -12.38304100 | 0.67108100  | -0.90545400 |                                                           |
| C                                                                                  | -11.57996700 | 0.16619800  | -0.05367100 |                                                           |
| H                                                                                  | -11.93186400 | -0.44387100 | 0.79374200  |                                                           |
| C                                                                                  | -10.12936000 | 0.38374600  | -0.13725300 |                                                           |
| C                                                                                  | -9.59354000  | 1.14422600  | -1.18270000 |                                                           |
| C                                                                                  | -9.27490000  | -0.17577700 | 0.83445500  |                                                           |
| C                                                                                  | -8.22099900  | 1.35943700  | -1.27674900 |                                                           |
| H                                                                                  | -10.30054900 | 1.55233300  | -1.90376200 |                                                           |
| C                                                                                  | -7.90093400  | 0.04107800  | 0.73968200  |                                                           |
| C                                                                                  | -7.36772600  | 0.80146000  | -0.30314700 |                                                           |
| H                                                                                  | -7.18922500  | -0.36981500 | 1.45501800  |                                                           |
| C                                                                                  | -5.90810100  | 1.01184100  | -0.38164000 |                                                           |
| H                                                                                  | -5.53678600  | 1.53145600  | -1.28104800 |                                                           |
| N                                                                                  | -5.13511100  | 0.60684400  | 0.53835700  |                                                           |
| O                                                                                  | -9.85506400  | -0.90577100 | 1.81522900  |                                                           |
| O                                                                                  | -7.63578000  | 2.08664100  | -2.25821400 |                                                           |
| C                                                                                  | -9.02558100  | -1.48313600 | 2.79134200  |                                                           |
| H                                                                                  | -8.30548500  | -2.18577500 | 2.34211000  |                                                           |
| H                                                                                  | -8.46964700  | -0.71402400 | 3.35144100  |                                                           |
| H                                                                                  | -9.68282400  | -2.02672000 | 3.47860700  |                                                           |
| C                                                                                  | -8.45691000  | 2.63110200  | -3.25820100 |                                                           |
| H                                                                                  | -7.79636500  | 3.16072800  | -3.95321100 |                                                           |
| H                                                                                  | -9.00205500  | 1.84372200  | -3.80378300 |                                                           |
| H                                                                                  | -9.18623700  | 3.34225000  | -2.83703700 |                                                           |
| C                                                                                  | -3.71962400  | 0.82565600  | 0.38261200  |                                                           |
| H                                                                                  | -3.47561800  | 1.42426800  | -0.51402800 |                                                           |
| C                                                                                  | -2.97634600  | -0.52554300 | 0.28250300  |                                                           |
| O                                                                                  | -1.94170700  | -0.51018500 | -0.48596500 |                                                           |
| O                                                                                  | -3.34367200  | -1.46323700 | 0.96973700  |                                                           |
| C                                                                                  | -3.21258100  | 1.54656000  | 1.65638200  |                                                           |
| H                                                                                  | -3.97019900  | 2.29075900  | 1.93787700  |                                                           |
| H                                                                                  | -3.18383300  | 0.80194700  | 2.46778600  |                                                           |
| C                                                                                  | -1.90438000  | 2.26631900  | 1.53920600  |                                                           |
| C                                                                                  | -1.68524500  | 3.60378600  | 1.74771000  |                                                           |
| N                                                                                  | -0.34029200  | 3.80959500  | 1.54796700  |                                                           |
| H                                                                                  | -2.36828400  | 4.40174900  | 2.01924500  |                                                           |
| C                                                                                  | 0.22593300   | 2.63544200  | 1.22478400  |                                                           |
| H                                                                                  | 0.15150200   | 4.69107900  | 1.62059600  |                                                           |
| H                                                                                  | 1.28649900   | 2.48364400  | 0.99349800  |                                                           |
| N                                                                                  | -0.69175300  | 1.68328800  | 1.22019500  |                                                           |

|    |              |             |             |
|----|--------------|-------------|-------------|
| Zn | -0.23159200  | -0.11345900 | 0.31496900  |
| C  | 19.26546600  | 1.61777400  | -0.11030000 |
| N  | 20.16591800  | 0.73132700  | -0.55012800 |
| C  | 19.66716400  | -0.39187200 | -1.06061200 |
| C  | 17.53837800  | 0.27657000  | -0.68812500 |
| N  | 17.95123800  | 1.43523300  | -0.15820600 |
| N  | 18.36373200  | -0.66207300 | -1.14979300 |
| C  | 16.08042800  | 0.02643200  | -0.76294400 |
| C  | 15.59428400  | -1.16511900 | -1.31997000 |
| C  | 15.17313900  | 0.98276700  | -0.29131000 |
| C  | 14.22908700  | -1.39386800 | -1.40249700 |
| H  | 16.31017900  | -1.89790100 | -1.69190600 |
| C  | 13.80545200  | 0.74907900  | -0.35881800 |
| H  | 15.56179000  | 1.91322100  | 0.12230700  |
| C  | 13.31668000  | -0.45072100 | -0.90274200 |
| H  | 13.83453000  | -2.30904800 | -1.84464100 |
| H  | 13.10149300  | 1.50929600  | -0.01674800 |
| N  | 11.95069600  | -0.73219600 | -1.00772500 |
| C  | 11.16579400  | -0.42402300 | -0.05169800 |
| H  | 11.53337300  | 0.00837300  | 0.89277500  |
| C  | 9.71563900   | -0.64310200 | -0.14267800 |
| C  | 9.15846900   | -1.17614200 | -1.31000300 |
| C  | 8.88376400   | -0.31600300 | 0.94794700  |
| C  | 7.78535200   | -1.38583700 | -1.41486300 |
| H  | 9.84873800   | -1.41056800 | -2.11928500 |
| C  | 7.51012100   | -0.53165500 | 0.84337600  |
| C  | 6.95304200   | -1.05299600 | -0.32731400 |
| H  | 6.82603800   | -0.30481200 | 1.66074700  |
| C  | 5.49310900   | -1.24798400 | -0.42255800 |
| H  | 5.12687100   | -1.78731300 | -1.31187100 |
| N  | 4.71277700   | -0.80354400 | 0.47343100  |
| O  | 9.48124400   | 0.19445500  | 2.04752400  |
| O  | 7.18040900   | -1.89368300 | -2.51411100 |
| C  | 8.67040500   | 0.52774200  | 3.14872900  |
| H  | 7.90287000   | 1.26930600  | 2.87718700  |
| H  | 8.16951100   | -0.36471100 | 3.55801100  |
| H  | 9.33622000   | 0.94868200  | 3.90966300  |
| C  | 7.97929800   | -2.20856900 | -3.62494900 |
| H  | 7.30425500   | -2.58877400 | -4.39920500 |
| H  | 8.50455800   | -1.31809700 | -4.00651700 |
| H  | 8.72350900   | -2.98360800 | -3.37892400 |
| C  | 3.29745400   | -1.03468500 | 0.33099500  |
| H  | 3.05466400   | -1.68631200 | -0.52777900 |
| C  | 2.54119500   | 0.29946900  | 0.15630300  |
| O  | 1.46855900   | 0.21918900  | -0.54352600 |
| O  | 2.93843000   | 1.29737600  | 0.74202500  |
| C  | 2.80190200   | -1.68339600 | 1.64918300  |
| H  | 3.56846600   | -2.40446100 | 1.96437000  |
| H  | 2.77980600   | -0.89317000 | 2.41665300  |
| C  | 1.49778100   | -2.41794900 | 1.59588600  |
| C  | 1.29892900   | -3.74848000 | 1.86188500  |
| N  | -0.05052100  | -3.97177300 | 1.71959200  |
| H  | 1.99831400   | -4.53009600 | 2.13943900  |
| C  | -0.63913900  | -2.81451600 | 1.37480700  |
| H  | -0.53135000  | -4.85345000 | 1.84410500  |
| H  | -1.70936800  | -2.67533300 | 1.18045600  |
| N  | 0.26941300   | -1.85670600 | 1.30086100  |
| C  | 20.62124200  | -1.42925900 | -1.57048300 |
| H  | 20.47502900  | -2.36637400 | -1.01550300 |
| H  | 20.40415100  | -1.64132900 | -2.62637000 |
| H  | 21.65336500  | -1.08320300 | -1.45833700 |
| C  | 19.79042300  | 2.89666000  | 0.46812900  |
| H  | 20.36397800  | 3.43559200  | -0.29897800 |
| H  | 18.96596300  | 3.52071000  | 0.82656600  |
| H  | 20.48369800  | 2.67094700  | 1.28974500  |
| C  | -20.23782400 | -3.05734700 | 0.06466000  |
| H  | -19.87753600 | -3.77904600 | -0.68160600 |
| H  | -19.83385800 | -3.36893100 | 1.03765700  |
| H  | -21.33185900 | -3.05881600 | 0.09100600  |
| C  | -21.06588400 | 1.58666600  | -1.07844700 |
| H  | -20.52937400 | 2.50781800  | -1.32594100 |
| H  | -21.73249800 | 1.30160300  | -1.90390200 |
| H  | -21.69776100 | 1.74350900  | -0.19323000 |
| C  | 5.48650300   | 1.93077900  | 0.89848900  |
| O  | 5.53004800   | 1.88580400  | 2.05655300  |

|                                                                                    |              |             |             |                                                           |
|------------------------------------------------------------------------------------|--------------|-------------|-------------|-----------------------------------------------------------|
| O                                                                                  | 5.52922200   | 2.02932800  | -0.25205500 |                                                           |
| <b>N19 (19.2 / 13.8)</b>                                                           |              |             |             |                                                           |
| 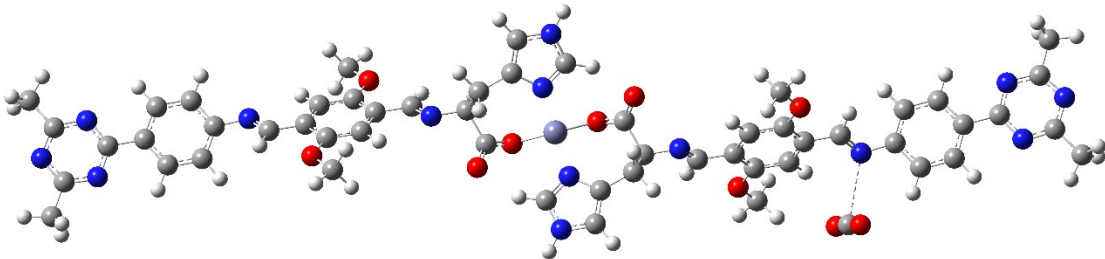 |              |             |             |                                                           |
| 0 1                                                                                |              |             |             | Zero-point correction= 1.033841 (Hartree/Particle)        |
| C                                                                                  | -19.83751100 | -1.73417300 | -0.80895000 | Thermal correction to Energy= 1.110604                    |
| N                                                                                  | -20.72656100 | -0.77366000 | -1.04993800 | Thermal correction to Enthalpy= 1.111548                  |
| C                                                                                  | -20.21807300 | 0.44296500  | -1.27613300 | Thermal correction to Gibbs Free Energy= 0.896203         |
| C                                                                                  | -18.09832800 | -0.30294700 | -1.01943900 | Sum of electronic and zero-point Energies= -5420.065225   |
| N                                                                                  | -18.51708300 | -1.54590000 | -0.78379400 | Sum of electronic and thermal Energies= -5419.988462      |
| N                                                                                  | -18.92039500 | 0.72401300  | -1.27072100 | Sum of electronic and thermal Enthalpies= -5419.987518    |
| C                                                                                  | -16.64118500 | -0.03839900 | -1.00126800 | Sum of electronic and thermal Free Energies= -5420.202862 |
| C                                                                                  | -16.15078900 | 1.25139300  | -1.25024700 |                                                           |
| C                                                                                  | -15.73787300 | -1.07801900 | -0.74825400 |                                                           |
| C                                                                                  | -14.78544200 | 1.49459800  | -1.24465400 |                                                           |
| H                                                                                  | -16.86257200 | 2.05078600  | -1.45511500 |                                                           |
| C                                                                                  | -14.37077300 | -0.83373300 | -0.72787300 |                                                           |
| H                                                                                  | -16.12986600 | -2.08017400 | -0.57476300 |                                                           |
| C                                                                                  | -13.87779100 | 0.46156200  | -0.96107500 |                                                           |
| H                                                                                  | -14.38719100 | 2.48884600  | -1.44860900 |                                                           |
| H                                                                                  | -13.66990600 | -1.65276800 | -0.55918600 |                                                           |
| N                                                                                  | -12.51224800 | 0.76363900  | -0.96411300 |                                                           |
| C                                                                                  | -11.74409900 | 0.23283200  | -0.09595800 |                                                           |
| H                                                                                  | -12.12720100 | -0.42074600 | 0.70413100  |                                                           |
| C                                                                                  | -10.29527100 | 0.47587700  | -0.09538000 |                                                           |
| C                                                                                  | -9.72108500  | 1.29546100  | -1.07368900 |                                                           |
| C                                                                                  | -9.48061500  | -0.11926100 | 0.88926200  |                                                           |
| C                                                                                  | -8.34938100  | 1.53471100  | -1.08782800 |                                                           |
| H                                                                                  | -10.39809500 | 1.72893200  | -1.80861100 |                                                           |
| C                                                                                  | -8.10741200  | 0.12114200  | 0.87406000  |                                                           |
| C                                                                                  | -7.53592200  | 0.94036800  | -0.10173200 |                                                           |
| H                                                                                  | -7.42505500  | -0.31568400 | 1.60251000  |                                                           |
| C                                                                                  | -6.07745700  | 1.17292200  | -0.09740100 |                                                           |
| H                                                                                  | -5.67116900  | 1.74663200  | -0.94740100 |                                                           |
| N                                                                                  | -5.34384000  | 0.72534600  | 0.83501300  |                                                           |
| O                                                                                  | -10.09614900 | -0.90565300 | 1.80262800  |                                                           |
| O                                                                                  | -7.72861200  | 2.31839600  | -2.00165400 |                                                           |
| C                                                                                  | -9.30615500  | -1.51824200 | 2.78995500  |                                                           |
| H                                                                                  | -8.55348600  | -2.18801700 | 2.34397000  |                                                           |
| H                                                                                  | -8.79105200  | -0.76963300 | 3.41328400  |                                                           |
| H                                                                                  | -9.98728300  | -2.10388700 | 3.41675400  |                                                           |
| C                                                                                  | -8.50812200  | 2.89838900  | -3.01480000 |                                                           |
| H                                                                                  | -7.82295100  | 3.47029100  | -3.64987700 |                                                           |
| H                                                                                  | -9.01226600  | 2.13029400  | -3.62365300 |                                                           |
| H                                                                                  | -9.26932100  | 3.57789600  | -2.59779400 |                                                           |
| C                                                                                  | -3.92509100  | 0.96618700  | 0.76045000  |                                                           |
| H                                                                                  | -3.64699500  | 1.62248500  | -0.08433700 |                                                           |
| C                                                                                  | -3.16555200  | -0.37153400 | 0.60884600  |                                                           |
| O                                                                                  | -2.11768700  | -0.31242000 | -0.13845100 |                                                           |
| O                                                                                  | -3.53816400  | -1.34359800 | 1.24397400  |                                                           |
| C                                                                                  | -3.48472700  | 1.60475300  | 2.09981200  |                                                           |
| H                                                                                  | -4.25799500  | 2.32823600  | 2.39274900  |                                                           |
| H                                                                                  | -3.49136900  | 0.80785800  | 2.86042600  |                                                           |
| C                                                                                  | -2.17516300  | 2.33161300  | 2.09116100  |                                                           |
| C                                                                                  | -1.96838900  | 3.64491200  | 2.42701000  |                                                           |
| N                                                                                  | -0.61812800  | 3.86869400  | 2.29253700  |                                                           |
| H                                                                                  | -2.66341800  | 4.41468100  | 2.74545000  |                                                           |
| C                                                                                  | -0.03707300  | 2.72903300  | 1.88308900  |                                                           |
| H                                                                                  | -0.13220100  | 4.74014000  | 2.46095000  |                                                           |
| H                                                                                  | 1.03190500   | 2.59836400  | 1.67607800  |                                                           |
| N                                                                                  | -0.95058100  | 1.78049300  | 1.76079400  |                                                           |
| Zn                                                                                 | -0.42787600  | 0.07502500  | 0.71197200  |                                                           |
| C                                                                                  | 18.81193800  | 2.39698800  | -1.06751300 |                                                           |
| N                                                                                  | 19.78431300  | 1.50336700  | -0.90357200 |                                                           |

|   |              |             |             |
|---|--------------|-------------|-------------|
| C | 19.38542300  | 0.23980400  | -0.71893100 |
| C | 17.20416800  | 0.81865100  | -0.86608500 |
| N | 17.51104900  | 2.10124000  | -1.05620300 |
| N | 18.11537100  | -0.14705100 | -0.69277900 |
| C | 15.77310300  | 0.43639800  | -0.84291300 |
| C | 15.39807300  | -0.90035600 | -0.64816100 |
| C | 14.78025100  | 1.40630000  | -1.02198100 |
| C | 14.05879400  | -1.26194000 | -0.63756300 |
| H | 16.17927500  | -1.64722400 | -0.50838700 |
| C | 13.43767500  | 1.04974900  | -0.99895100 |
| H | 15.08204700  | 2.44105500  | -1.18390200 |
| C | 13.06051200  | -0.28816600 | -0.79859000 |
| H | 13.76329100  | -2.29822700 | -0.47474100 |
| H | 12.66460500  | 1.80174900  | -1.16503100 |
| N | 11.71305900  | -0.67721600 | -0.79392700 |
| C | 10.88434100  | -0.00745400 | -0.09183600 |
| H | 11.21910600  | 0.80147900  | 0.57748700  |
| C | 9.43933900   | -0.26903400 | -0.11655800 |
| C | 8.86792000   | -1.00192500 | -1.16345600 |
| C | 8.62096200   | 0.25044800  | 0.90733900  |
| C | 7.49405700   | -1.23779300 | -1.20096300 |
| H | 9.53414800   | -1.36369700 | -1.94549100 |
| C | 7.24851900   | 0.01105800  | 0.87039900  |
| C | 6.67991500   | -0.72713900 | -0.16985200 |
| H | 6.56444900   | 0.38646900  | 1.63086500  |
| C | 5.22053600   | -0.95497700 | -0.18983900 |
| H | 4.81505700   | -1.45088400 | -1.08776300 |
| N | 4.48660600   | -0.58847000 | 0.77693500  |
| O | 9.23660100   | 0.95853400  | 1.88168500  |
| O | 6.87478000   | -1.93248900 | -2.18220100 |
| C | 8.44310600   | 1.51302200  | 2.90058700  |
| H | 7.69763200   | 2.21443100  | 2.49270600  |
| H | 7.91946600   | 0.72937800  | 3.47127200  |
| H | 9.12359900   | 2.05264900  | 3.56794100  |
| C | 7.65255800   | -2.39980000 | -3.25710100 |
| H | 6.96861800   | -2.92636000 | -3.93136400 |
| H | 8.12464500   | -1.56425800 | -3.79961600 |
| H | 8.43944500   | -3.09005500 | -2.91645700 |
| C | 3.06736700   | -0.81806400 | 0.68000300  |
| H | 2.78810900   | -1.38898100 | -0.22428900 |
| C | 2.31074200   | 0.52990200  | 0.65893300  |
| O | 1.26375100   | 0.54631400  | -0.09151400 |
| O | 2.68501200   | 1.43457700  | 1.38600000  |
| C | 2.62585800   | -1.58281000 | 1.95122800  |
| H | 3.39884200   | -2.33113200 | 2.17414800  |
| H | 2.63096100   | -0.86323700 | 2.78535800  |
| C | 1.31659300   | -2.30553700 | 1.86943500  |
| C | 1.10901100   | -3.64505000 | 2.07645100  |
| N | -0.24074100  | -3.85457300 | 1.91649300  |
| H | 1.80306600   | -4.44204500 | 2.32159000  |
| C | -0.82063700  | -2.68072600 | 1.61677300  |
| H | -0.72697800  | -4.73823100 | 1.99807100  |
| H | -1.88903200  | -2.53021000 | 1.42028800  |
| N | 0.09313100   | -1.72495300 | 1.58951200  |
| C | 20.45337700  | -0.79465800 | -0.53218400 |
| H | 21.08342900  | -0.52033300 | 0.32499600  |
| H | 20.00651800  | -1.78093700 | -0.37353600 |
| H | 21.10378900  | -0.81255900 | -1.41771500 |
| C | 19.18970900  | 3.83144000  | -1.28193800 |
| H | 18.81056200  | 4.16833700  | -2.25686300 |
| H | 18.71203200  | 4.45666200  | -0.51528400 |
| H | 20.27718300  | 3.94729100  | -1.24226900 |
| C | -20.33969700 | -3.12247600 | -0.55012100 |
| H | -19.94147900 | -3.80434900 | -1.31447800 |
| H | -19.96788900 | -3.47355300 | 0.42214700  |
| H | -21.43380300 | -3.13922000 | -0.56655400 |
| C | -21.18952400 | 1.54960400  | -1.55421700 |
| H | -20.65956500 | 2.49633200  | -1.69727800 |
| H | -21.77411300 | 1.30518600  | -2.45208300 |
| H | -21.89953200 | 1.63276800  | -0.72006300 |
| C | 11.20169000  | -3.51176300 | -1.01057700 |
| O | 11.65086000  | -3.58419800 | 0.05174700  |
| O | 10.75088700  | -3.49633600 | -2.07698500 |

# N6 (20.4/19.7)

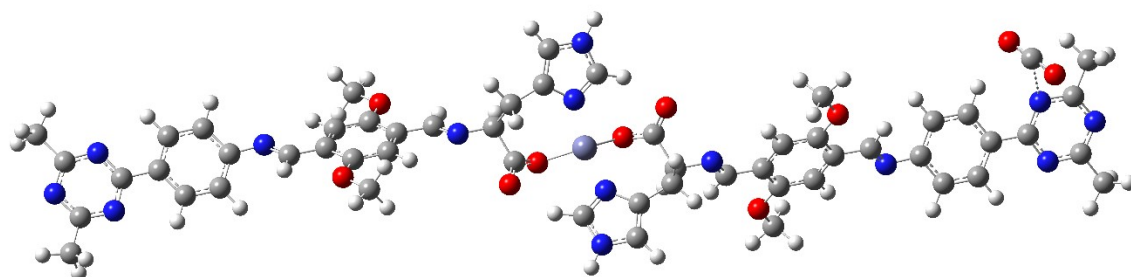

|     |              |             |             |
|-----|--------------|-------------|-------------|
| 0 1 |              |             |             |
| C   | -20.04665700 | -1.85839000 | -0.35930700 |
| N   | -20.93206000 | -0.99359700 | -0.84845900 |
| C   | -20.41913500 | 0.11881300  | -1.38639000 |
| C   | -18.30237200 | -0.53809500 | -0.93540400 |
| N   | -18.72573000 | -1.67338300 | -0.38064900 |
| N   | -19.12055300 | 0.38803100  | -1.45154900 |
| C   | -16.84431500 | -0.28267500 | -0.98413700 |
| C   | -16.34822400 | 0.89124200  | -1.56885800 |
| C   | -15.94579000 | -1.21912000 | -0.45845400 |
| C   | -14.98188000 | 1.12222200  | -1.62552500 |
| H   | -17.05638100 | 1.60869800  | -1.98289800 |
| C   | -14.57778100 | -0.98279500 | -0.50034400 |
| H   | -16.34228300 | -2.13648400 | -0.02338700 |
| C   | -14.07908500 | 0.20007300  | -1.07230000 |
| H   | -14.57934600 | 2.02358300  | -2.08838000 |
| H   | -13.88019600 | -1.72833700 | -0.11557400 |
| N   | -12.71186100 | 0.48267500  | -1.15334800 |
| C   | -11.94985900 | 0.20989900  | -0.16827000 |
| H   | -12.34025300 | -0.19145500 | 0.78076100  |
| C   | -10.49878000 | 0.43088800  | -0.22978700 |
| C   | -9.91373300  | 0.92655800  | -1.40049600 |
| C   | -9.69276600  | 0.13803500  | 0.88911200  |
| C   | -8.53923300  | 1.13613000  | -1.47684200 |
| H   | -10.58456600 | 1.13571300  | -2.23272800 |
| C   | -8.31676800  | 0.34877200  | 0.81153800  |
| C   | -7.73421200  | 0.84300700  | -0.35729900 |
| H   | -7.64065500  | 0.13421000  | 1.63851800  |
| C   | -6.27243400  | 1.04589900  | -0.41508400 |
| H   | -5.85660500  | 1.33130500  | -1.39611900 |
| N   | -5.54664300  | 0.88780600  | 0.61260600  |
| O   | -10.31882000 | -0.34365000 | 1.98797200  |
| O   | -7.90770000  | 1.61511600  | -2.57519700 |
| C   | -9.53725300  | -0.65553800 | 3.11316800  |
| H   | -8.79194600  | -1.43332500 | 2.88168100  |
| H   | -9.01413400  | 0.23482100  | 3.49769900  |
| H   | -10.22599000 | -1.02899100 | 3.87865300  |
| C   | -8.67869700  | 1.88682400  | -3.71632500 |
| H   | -7.98596800  | 2.24478800  | -4.48564000 |
| H   | -9.19023200  | 0.98120000  | -4.08105700 |
| H   | -9.43304600  | 2.66527900  | -3.51630700 |
| C   | -4.12394800  | 1.07086400  | 0.47653600  |
| H   | -3.83301600  | 1.42283300  | -0.53005400 |
| C   | -3.38867500  | -0.25919900 | 0.76003500  |
| O   | -2.34706800  | -0.46451600 | 0.03009900  |
| O   | -3.77244900  | -0.96789900 | 1.67530200  |
| C   | -3.67374800  | 2.09150600  | 1.54927900  |
| H   | -4.43431000  | 2.88308200  | 1.59573700  |
| H   | -3.69327500  | 1.57473800  | 2.52196900  |
| C   | -2.35184800  | 2.75653900  | 1.31696800  |
| C   | -2.12031200  | 4.10528300  | 1.23008000  |
| N   | -0.76732700  | 4.25161100  | 1.03118300  |
| H   | -2.79986400  | 4.94845800  | 1.29540200  |
| C   | -0.20881400  | 3.03067800  | 0.99294600  |
| H   | -0.26550500  | 5.12329100  | 0.92042300  |
| H   | 0.85627000   | 2.82303700  | 0.83428000  |
| N   | -1.13927900  | 2.10782000  | 1.17116300  |
| Zn  | -0.64686400  | 0.15180600  | 0.70705700  |
| C   | 18.79396800  | 0.95033500  | -1.31828700 |
| N   | 19.63838900  | -0.07204200 | -1.43708200 |

|                                              |                             |
|----------------------------------------------|-----------------------------|
| Zero-point correction=                       | 1.034000 (Hartree/Particle) |
| Thermal correction to Energy=                | 1.110543                    |
| Thermal correction to Enthalpy=              | 1.111487                    |
| Thermal correction to Gibbs Free Energy=     | 0.897931                    |
| Sum of electronic and zero-point Energies=   | -5420.064546                |
| Sum of electronic and thermal Energies=      | -5419.988003                |
| Sum of electronic and thermal Enthalpies=    | -5419.987059                |
| Sum of electronic and thermal Free Energies= | -5420.200615                |

|   |              |             |             |
|---|--------------|-------------|-------------|
| C | 19.08247500  | -1.28669600 | -1.42860100 |
| C | 16.99873700  | -0.42821500 | -1.22522900 |
| N | 17.47152700  | 0.82122200  | -1.20793700 |
| N | 17.77575500  | -1.51095200 | -1.32808900 |
| C | 15.53526300  | -0.62756600 | -1.12585600 |
| C | 15.00590800  | -1.92226800 | -1.02117700 |
| C | 14.66365100  | 0.46868300  | -1.15688100 |
| C | 13.63536200  | -2.11449500 | -0.93835600 |
| H | 15.69243100  | -2.76856900 | -1.01381800 |
| C | 13.29057700  | 0.27816800  | -1.06224800 |
| H | 15.07383300  | 1.47239500  | -1.26987800 |
| C | 12.75975500  | -1.01650200 | -0.93431800 |
| H | 13.20806400  | -3.11489400 | -0.86565600 |
| H | 12.61508200  | 1.13307300  | -1.11902000 |
| N | 11.38710900  | -1.26710800 | -0.84758500 |
| C | 10.64703000  | -0.50470900 | -0.14276600 |
| H | 11.06036300  | 0.32250200  | 0.45648300  |
| C | 9.19222900   | -0.69392300 | -0.06949400 |
| C | 8.57998500   | -1.71438600 | -0.80605200 |
| C | 8.41035800   | 0.15458900  | 0.74049100  |
| C | 7.20201200   | -1.90584100 | -0.74931700 |
| H | 9.23287300   | -2.33966700 | -1.41361600 |
| C | 7.03073100   | -0.03898000 | 0.79736000  |
| C | 6.42126900   | -1.05803900 | 0.06266700  |
| H | 6.37276500   | 0.58703900  | 1.39928300  |
| C | 4.95719900   | -1.23745900 | 0.13728900  |
| H | 4.52121300   | -1.98823400 | -0.54311000 |
| N | 4.25159700   | -0.55459200 | 0.93965700  |
| O | 9.06219900   | 1.12478300  | 1.42223000  |
| O | 6.54485100   | -2.87342100 | -1.43229600 |
| C | 8.30557200   | 1.99118000  | 2.22932500  |
| H | 7.56538700   | 2.55023300  | 1.63473000  |
| H | 7.77929600   | 1.44045000  | 3.02554500  |
| H | 9.01294700   | 2.69414100  | 2.68234800  |
| C | 7.29104800   | -3.71236500 | -2.27480100 |
| H | 6.57967300   | -4.40278300 | -2.74078700 |
| H | 7.80692600   | -3.13700800 | -3.06071700 |
| H | 8.03920100   | -4.29001900 | -1.70765300 |
| C | 2.82630900   | -0.76662700 | 0.94101800  |
| H | 2.51702300   | -1.58811100 | 0.26923100  |
| C | 2.09544200   | 0.52340700  | 0.50298300  |
| O | 1.04177100   | 0.32836000  | -0.21242200 |
| O | 2.49373600   | 1.60121900  | 0.91126200  |
| C | 2.39626500   | -1.07684100 | 2.39514400  |
| H | 3.16092000   | -1.73091800 | 2.83630700  |
| H | 2.42698800   | -0.12911300 | 2.95588700  |
| C | 1.07450600   | -1.76135200 | 2.56123100  |
| C | 0.84722200   | -2.95629900 | 3.19418900  |
| N | -0.50735500  | -3.18137900 | 3.11660600  |
| H | 1.53067800   | -3.64307400 | 3.68228400  |
| C | -1.07093700  | -2.15870900 | 2.45286200  |
| H | -1.00704100  | -3.98116400 | 3.48346200  |
| H | -2.13857600  | -2.06084600 | 2.22198400  |
| N | -0.14196700  | -1.28112300 | 2.11205900  |
| C | 20.00071400  | -2.46381600 | -1.55492800 |
| H | 20.81465600  | -2.37792600 | -0.82330500 |
| H | 19.44771200  | -3.39709600 | -1.41051000 |
| H | 20.46070300  | -2.45828400 | -2.55366900 |
| C | 19.37153300  | 2.33287900  | -1.27713200 |
| H | 18.61761100  | 3.07089400  | -1.57677700 |
| H | 19.69371300  | 2.55077400  | -0.24728900 |
| H | 20.25408300  | 2.39146600  | -1.92455400 |
| C | -20.55388700 | -3.12711900 | 0.25679300  |
| H | -20.14479300 | -3.98875800 | -0.28891400 |
| H | -20.19696800 | -3.20129000 | 1.29317500  |
| H | -21.64767200 | -3.15069100 | 0.23049500  |
| C | -21.38620400 | 1.11470700  | -1.95090100 |
| H | -20.85365400 | 1.99406300  | -2.32606000 |
| H | -21.95894700 | 0.64665500  | -2.76375800 |
| H | -22.10715600 | 1.40703600  | -1.17539400 |
| C | 16.77408500  | 2.82860300  | 0.66999600  |
| O | 17.50858800  | 2.29767700  | 1.38888600  |
| O | 16.03933300  | 3.39678300  | -0.01965100 |

# N8 (21.0/18.9)

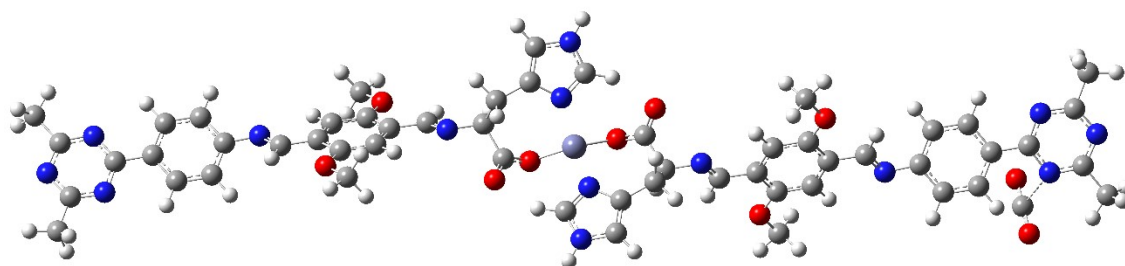

|     |              |             |             |
|-----|--------------|-------------|-------------|
| 0 1 |              |             |             |
| C   | -20.05479300 | -2.06957700 | 0.05111400  |
| N   | -20.93931200 | -1.37036600 | -0.65586800 |
| C   | -20.42606200 | -0.43781900 | -1.46628900 |
| C   | -18.31066200 | -0.93969600 | -0.84267100 |
| N   | -18.73437600 | -1.88947700 | -0.00949200 |
| N   | -19.12796700 | -0.18849500 | -1.59187000 |
| C   | -16.85329300 | -0.69719800 | -0.94698100 |
| C   | -16.35751600 | 0.28369700  | -1.81762500 |
| C   | -15.95507900 | -1.45530600 | -0.18590800 |
| C   | -14.99184700 | 0.50100500  | -1.92289500 |
| H   | -17.06531300 | 0.86136900  | -2.41172100 |
| C   | -14.58780500 | -1.22903300 | -0.27851500 |
| H   | -16.35110100 | -2.22778300 | 0.47326000  |
| C   | -14.08968100 | -0.23564800 | -1.13874600 |
| H   | -14.58930800 | 1.25093100  | -2.60427700 |
| H   | -13.89035300 | -1.84158100 | 0.29493900  |
| N   | -12.72359100 | 0.02751400  | -1.28123400 |
| C   | -11.96798700 | 0.02811000  | -0.25435300 |
| H   | -12.36299500 | -0.11703300 | 0.76400500  |
| C   | -10.51880900 | 0.24393700  | -0.36248400 |
| C   | -9.92955000  | 0.43120200  | -1.61796700 |
| C   | -9.71936100  | 0.26082500  | 0.79854000  |
| C   | -8.55765600  | 0.63724400  | -1.73782900 |
| H   | -10.59531000 | 0.40927500  | -2.47972700 |
| C   | -8.34608800  | 0.46863200  | 0.67732100  |
| C   | -7.75962100  | 0.65679600  | -0.57589300 |
| H   | -7.67521000  | 0.48668400  | 1.53564600  |
| C   | -6.30161500  | 0.87075900  | -0.67488100 |
| H   | -5.88035200  | 0.90643700  | -1.69374800 |
| N   | -5.58510000  | 0.99857200  | 0.36345200  |
| O   | -10.34901000 | 0.06668100  | 1.98059400  |
| O   | -7.92261600  | 0.82863800  | -2.91884000 |
| C   | -9.57474300  | 0.07096500  | 3.15306700  |
| H   | -8.81453600  | -0.72641400 | 3.13555000  |
| H   | -9.07023400  | 1.03996900  | 3.29720400  |
| H   | -10.26563300 | -0.10440800 | 3.98475800  |
| C   | -8.68640700  | 0.78504200  | -4.09577500 |
| H   | -7.99149500  | 0.94444700  | -4.92737400 |
| H   | -9.18130300  | -0.19218200 | -4.21800800 |
| H   | -9.45380300  | 1.57626900  | -4.10709200 |
| C   | -4.16596700  | 1.18106000  | 0.19395700  |
| H   | -3.87052800  | 1.26999900  | -0.86747300 |
| C   | -3.39787200  | -0.00689400 | 0.81703300  |
| O   | -2.33382000  | -0.35333400 | 0.17846900  |
| O   | -3.78071800  | -0.47354700 | 1.87664500  |
| C   | -3.75998000  | 2.45797400  | 0.96920800  |
| H   | -4.54442900  | 3.20960300  | 0.80535100  |
| H   | -3.77750300  | 2.20963100  | 2.04233000  |
| C   | -2.45562600  | 3.08327300  | 0.58074500  |
| C   | -2.26440300  | 4.36831000  | 0.14214300  |
| N   | -0.91323800  | 4.50348700  | -0.07601200 |
| H   | -2.97063300  | 5.17496700  | -0.02383400 |
| C   | -0.31665300  | 3.33592100  | 0.21559700  |
| H   | -0.43669900  | 5.33184500  | -0.40864900 |
| H   | 0.75703700   | 3.13070700  | 0.12824300  |
| N   | -1.22124000  | 2.46144700  | 0.62318800  |
| Zn  | -0.66527100  | 0.46925500  | 0.69531300  |
| C   | 18.76817600  | 1.53322700  | -1.15858500 |
| N   | 19.65728300  | 0.55510500  | -0.99775900 |
| C   | 19.14967000  | -0.64893600 | -0.71620100 |
| C   | 17.02841700  | 0.14487900  | -0.75890000 |

|                                              |                             |
|----------------------------------------------|-----------------------------|
| Zero-point correction=                       | 1.033609 (Hartree/Particle) |
| Thermal correction to Energy=                | 1.110381                    |
| Thermal correction to Enthalpy=              | 1.11326                     |
| Thermal correction to Gibbs Free Energy=     | 0.895731                    |
| Sum of electronic and zero-point Energies=   | -5420.064567                |
| Sum of electronic and thermal Energies=      | -5419.987794                |
| Sum of electronic and thermal Enthalpies=    | -5419.986850                |
| Sum of electronic and thermal Free Energies= | -5420.202445                |

|   |              |             |             |
|---|--------------|-------------|-------------|
| N | 17.44786100  | 1.37532100  | -1.04661700 |
| N | 17.85089000  | -0.89878500 | -0.58975300 |
| C | 15.57370800  | -0.09163400 | -0.62039300 |
| C | 15.09248700  | -1.33207200 | -0.17521700 |
| C | 14.66193400  | 0.91958600  | -0.94455800 |
| C | 13.72824700  | -1.55700000 | -0.06728200 |
| H | 15.80588300  | -2.11456300 | 0.08746300  |
| C | 13.29529200  | 0.70071900  | -0.82540500 |
| H | 15.04660700  | 1.87533300  | -1.30047300 |
| C | 12.81116100  | -0.53798500 | -0.37196100 |
| H | 13.33896500  | -2.51853100 | 0.26835700  |
| H | 12.58804300  | 1.48047200  | -1.11216200 |
| N | 11.44721000  | -0.81743100 | -0.24572700 |
| C | 10.66019900  | 0.06788800  | 0.22602800  |
| H | 11.02611500  | 1.03849200  | 0.59793200  |
| C | 9.21210600   | -0.15842000 | 0.32237500  |
| C | 8.65761000   | -1.35836200 | -0.13746800 |
| C | 8.37841700   | 0.83473800  | 0.87544300  |
| C | 7.28667700   | -1.58759600 | -0.05507500 |
| H | 9.34877500   | -2.08975600 | -0.55421700 |
| C | 7.00598800   | 0.60343100  | 0.95843500  |
| C | 6.45413200   | -0.59447000 | 0.50002600  |
| H | 6.30952700   | 1.33381300  | 1.36900400  |
| C | 4.99595800   | -0.80985500 | 0.59433900  |
| H | 4.60517800   | -1.72678500 | 0.12186100  |
| N | 4.24586300   | 0.02589500  | 1.18316000  |
| O | 8.97555400   | 1.97405500  | 1.29557600  |
| O | 6.68400600   | -2.72462100 | -0.47730000 |
| C | 8.16628700   | 2.98390700  | 1.84317700  |
| H | 7.42071900   | 3.34048600  | 1.11451000  |
| H | 7.64122800   | 2.63184100  | 2.74571500  |
| H | 8.83471700   | 3.80892600  | 2.11207600  |
| C | 7.48269100   | -3.71846400 | -1.06468600 |
| H | 6.80997000   | -4.53488600 | -1.34881900 |
| H | 7.99687100   | -3.34161800 | -1.96380900 |
| H | 8.23693300   | -4.09915200 | -0.35670700 |
| C | 2.82899500   | -0.23441300 | 1.21425200  |
| H | 2.56523400   | -1.21395500 | 0.77528700  |
| C | 2.06922500   | 0.86761700  | 0.44055600  |
| O | 1.03896300   | 0.45337200  | -0.21284700 |
| O | 2.42512900   | 2.02833900  | 0.55479400  |
| C | 2.36989600   | -0.17114700 | 2.69103600  |
| H | 3.14300300   | -0.65847600 | 3.30094900  |
| H | 2.35563700   | 0.89038000  | 2.98517900  |
| C | 1.06652500   | -0.83750100 | 3.00774400  |
| C | 0.86113500   | -1.83613400 | 3.92465400  |
| N | -0.48357100  | -2.12221300 | 3.88740000  |
| H | 1.55350800   | -2.34836900 | 4.58438400  |
| C | -1.06245400  | -1.32629000 | 2.97337700  |
| H | -0.96704600  | -2.81737400 | 4.44141000  |
| H | -2.12683100  | -1.32987400 | 2.70909400  |
| N | -0.15312600  | -0.53340000 | 2.43135900  |
| C | 20.11172700  | -1.78169500 | -0.52436100 |
| H | 20.63751800  | -1.64824600 | 0.43271700  |
| H | 19.57900700  | -2.73870300 | -0.51064500 |
| H | 20.87084300  | -1.76379000 | -1.31657700 |
| C | 19.27060600  | 2.90432700  | -1.49438400 |
| H | 18.90152500  | 3.19354300  | -2.48866000 |
| H | 18.86917400  | 3.63130300  | -0.77575600 |
| H | 20.36477200  | 2.92048400  | -1.48520500 |
| C | -20.56237300 | -3.13407000 | 0.97617400  |
| H | -20.17010400 | -4.11085200 | 0.65989700  |
| H | -20.18859200 | -2.94870600 | 1.99228400  |
| H | -21.65658600 | -3.15143500 | 0.97038700  |
| C | -21.39243300 | 0.36964400  | -2.27859400 |
| H | -20.85754100 | 1.09814200  | -2.89567000 |
| H | -21.98653600 | -0.30149500 | -2.91414200 |
| H | -22.09460900 | 0.88359700  | -1.60777000 |
| C | 16.96443400  | -2.96610600 | -2.29020100 |
| O | 17.20045000  | -3.82077900 | -1.54601900 |
| O | 16.72464000  | -2.13870500 | -3.06129500 |

**O88 (15.7/13.0)**

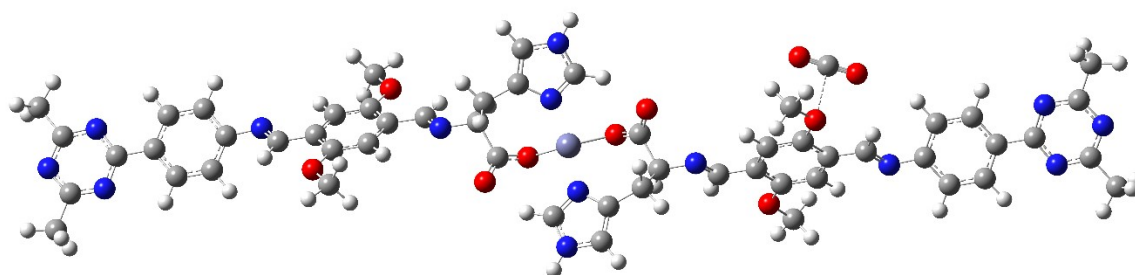

|     |              |             |             |
|-----|--------------|-------------|-------------|
| O 1 |              |             |             |
| C   | -19.79457500 | -1.71716100 | -0.78725000 |
| N   | -20.67210000 | -0.75351800 | -1.05635300 |
| C   | -20.14916700 | 0.45011200  | -1.31656000 |
| C   | -18.03849400 | -0.31310600 | -1.03690600 |
| N   | -18.47204400 | -1.54379000 | -0.76617000 |
| N   | -18.84825800 | 0.71587200  | -1.31807400 |
| C   | -16.57832000 | -0.06545700 | -1.02541500 |
| C   | -16.07245300 | 1.21004100  | -1.31401000 |
| C   | -15.68759500 | -1.10734100 | -0.73936000 |
| C   | -14.70430900 | 1.43699600  | -1.31535700 |
| H   | -16.77457800 | 2.01111100  | -1.54407600 |
| C   | -14.31767600 | -0.87877400 | -0.72545000 |
| H   | -16.09155600 | -2.09887200 | -0.53501200 |
| C   | -13.80919600 | 0.40251600  | -0.99908200 |
| H   | -14.29419500 | 2.41953300  | -1.55018800 |
| H   | -13.62652600 | -1.70025800 | -0.53055900 |
| N   | -12.44002800 | 0.68714600  | -1.01140800 |
| C   | -11.67926900 | 0.17834000  | -0.12380900 |
| H   | -12.07135400 | -0.44049100 | 0.69927200  |
| C   | -10.22727300 | 0.40172000  | -0.13124300 |
| C   | -9.64126200  | 1.17174100  | -1.14226900 |
| C   | -9.42149900  | -0.16290700 | 0.87833900  |
| C   | -8.26630100  | 1.39062500  | -1.16520800 |
| H   | -10.31172400 | 1.58364100  | -1.89537400 |
| C   | -8.04503500  | 0.05753900  | 0.85461200  |
| C   | -7.46169400  | 0.82673200  | -0.15429200 |
| H   | -7.36930200  | -0.35750700 | 1.60174900  |
| C   | -6.00002100  | 1.03818700  | -0.15863800 |
| H   | -5.58424700  | 1.56292500  | -1.03530100 |
| N   | -5.27419000  | 0.62681100  | 0.79627500  |
| O   | -10.04825600 | -0.90172400 | 1.82321600  |
| O   | -7.63417400  | 2.12655000  | -2.11044200 |
| C   | -9.26698000  | -1.48428300 | 2.83538300  |
| H   | -8.52371000  | -2.18223300 | 2.41771200  |
| H   | -8.74136800  | -0.71797600 | 3.42765500  |
| H   | -9.95629700  | -2.03401700 | 3.48532000  |
| C   | -8.40528500  | 2.67590200  | -3.14680000 |
| H   | -7.71197000  | 3.21140300  | -3.80438300 |
| H   | -8.92060000  | 1.89099700  | -3.72405000 |
| H   | -9.15656100  | 3.38276900  | -2.75822600 |
| C   | -3.85206000  | 0.84294200  | 0.71254400  |
| H   | -3.56235500  | 1.44106300  | -0.17067700 |
| C   | -3.11114000  | -0.51222500 | 0.64851900  |
| O   | -2.06429600  | -0.51752000 | -0.10250000 |
| O   | -3.49560100  | -1.43481200 | 1.34725100  |
| C   | -3.40625800  | 1.55830200  | 2.01061700  |
| H   | -4.17040800  | 2.30867500  | 2.25598900  |
| H   | -3.42422000  | 0.81075700  | 2.81958600  |
| C   | -2.08740300  | 2.26632100  | 1.95853300  |
| C   | -1.86335700  | 3.59438200  | 2.21607600  |
| N   | -0.51057800  | 3.79247900  | 2.06748500  |
| H   | -2.54804700  | 4.39040500  | 2.48911900  |
| C   | 0.05521300   | 2.62337800  | 1.72549900  |
| H   | -0.01316700  | 4.66596100  | 2.18390600  |
| H   | 1.12219800   | 2.46658400  | 1.52652600  |
| N   | -0.87050700  | 1.68098800  | 1.65998300  |
| Zn  | -0.36877500  | -0.09149200 | 0.71740000  |
| C   | 19.05742300  | 1.44182800  | -0.79844000 |
| N   | 19.93417500  | 0.47149100  | -1.04527700 |
| C   | 19.40939200  | -0.73559700 | -1.28508500 |
| C   | 17.29891100  | 0.03732700  | -1.02954200 |

|                                              |                             |
|----------------------------------------------|-----------------------------|
| Zero-point correction=                       | 1.033895 (Hartree/Particle) |
| Thermal correction to Energy=                | 1.110523                    |
| Thermal correction to Enthalpy=              | 1.111468                    |
| Thermal correction to Gibbs Free Energy=     | 0.897168                    |
| Sum of electronic and zero-point Energies=   | -5420.066450                |
| Sum of electronic and thermal Energies=      | -5419.989822                |
| Sum of electronic and thermal Enthalpies=    | -5419.988877                |
| Sum of electronic and thermal Free Energies= | -5420.203176                |

|   |              |             |             |
|---|--------------|-------------|-------------|
| N | 17.73454500  | 1.27192100  | -0.78000100 |
| N | 18.10805000  | -0.99848400 | -1.28757100 |
| C | 15.83830700  | -0.20687900 | -1.02006700 |
| C | 15.33192100  | -1.48717400 | -1.28624900 |
| C | 14.94822700  | 0.84227200  | -0.75833800 |
| C | 13.96335100  | -1.71207100 | -1.28922300 |
| H | 16.03390600  | -2.29351400 | -1.49755800 |
| C | 13.57751100  | 0.61757800  | -0.74496000 |
| H | 15.35324600  | 1.83688200  | -0.57191000 |
| C | 13.07084600  | -0.66911400 | -0.99610700 |
| H | 13.55282400  | -2.69835100 | -1.50727400 |
| H | 12.88130600  | 1.43983000  | -0.57212700 |
| N | 11.69891900  | -0.94292700 | -1.00849500 |
| C | 10.94831600  | -0.41509500 | -0.12479800 |
| H | 11.35196300  | 0.20242400  | 0.69271200  |
| C | 9.49023000   | -0.61059600 | -0.13689700 |
| C | 8.90075900   | -1.40515700 | -1.12689500 |
| C | 8.68261900   | -0.01089500 | 0.84954500  |
| C | 7.52484900   | -1.61927400 | -1.14455000 |
| H | 9.57125900   | -1.84521900 | -1.86381500 |
| C | 7.30590100   | -0.22601400 | 0.83346600  |
| C | 6.72076900   | -1.02580000 | -0.15000400 |
| H | 6.63208100   | 0.21867500  | 1.56516000  |
| C | 5.25930000   | -1.23941700 | -0.14515500 |
| H | 4.84170100   | -1.78450500 | -1.00838300 |
| N | 4.53647400   | -0.80903300 | 0.80343100  |
| O | 9.30869800   | 0.77936000  | 1.76130600  |
| O | 6.89172200   | -2.38002700 | -2.06790300 |
| C | 8.54221500   | 1.28808200  | 2.82866800  |
| H | 7.76182700   | 1.97441600  | 2.46553600  |
| H | 8.07373000   | 0.47212900  | 3.40121400  |
| H | 9.23616100   | 1.83516400  | 3.47638000  |
| C | 7.66168000   | -2.96300800 | -3.08724700 |
| H | 6.96629400   | -3.51354100 | -3.72995800 |
| H | 8.18157100   | -2.19741400 | -3.68575600 |
| H | 8.40861400   | -3.66207500 | -2.67712800 |
| C | 3.11440300   | -1.03017900 | 0.72977700  |
| H | 2.82352000   | -1.65223500 | -0.13629000 |
| C | 2.37057200   | 0.32139700  | 0.63165700  |
| O | 1.32518300   | 0.30581200  | -0.12111600 |
| O | 2.75175200   | 1.26064900  | 1.30949200  |
| C | 2.67344000   | -1.71042900 | 2.04793600  |
| H | 3.43710700   | -2.45568200 | 2.30996200  |
| H | 2.69617600   | -0.94137300 | 2.83634600  |
| C | 1.35288800   | -2.41678800 | 2.01979600  |
| C | 1.12721300   | -3.73666200 | 2.31527700  |
| N | -0.22629300  | -3.93636000 | 2.17602800  |
| H | 1.81125100   | -4.52596300 | 2.60871200  |
| C | -0.79093800  | -2.77626200 | 1.80267900  |
| H | -0.72485300  | -4.80532400 | 2.31831400  |
| H | -1.85818300  | -2.62400600 | 1.60118200  |
| N | 0.13620800   | -1.83775200 | 1.70825300  |
| C | 20.36637200  | -1.85306900 | -1.57044000 |
| H | 21.07680200  | -1.94964000 | -0.73815000 |
| H | 19.82410000  | -2.79212000 | -1.71797800 |
| H | 20.95232400  | -1.61144800 | -2.46823400 |
| C | 19.57784800  | 2.82060000  | -0.52465900 |
| H | 19.19338200  | 3.51464600  | -1.28510800 |
| H | 19.20576400  | 3.16846800  | 0.44864000  |
| H | 20.67216600  | 2.82203000  | -0.53534100 |
| C | -20.31323800 | -3.09135400 | -0.48865800 |
| H | -19.91325200 | -3.80208800 | -1.22519700 |
| H | -19.95567600 | -3.41325600 | 0.49900200  |
| H | -21.40722800 | -3.09809500 | -0.51606100 |
| C | -21.10723900 | 1.55958600  | -1.62779600 |
| H | -20.56682200 | 2.49793000  | -1.78617700 |
| H | -21.68459900 | 1.30152200  | -2.52661900 |
| H | -21.82514900 | 1.66705500  | -0.80334600 |
| C | 9.52757200   | 2.84222100  | -0.05014000 |
| O | 8.48631400   | 3.18025800  | 0.32088300  |
| O | 10.57231300  | 2.52940600  | -0.43651700 |

**Table S4:** Cartesian coordinates, optimized structures, and the corresponding thermochemistry data of all the reactants, transition states, and product complexes involved in the N-formylation reaction catalysed by the **Zn@His-POP** polymer at the uM06-2X/def2-SVP(GD3) level of theory.

| Cartesian coordinates                                                               |             |             |             | Thermochemistry data                         |                             |
|-------------------------------------------------------------------------------------|-------------|-------------|-------------|----------------------------------------------|-----------------------------|
| <b>HOCO</b>                                                                         |             |             |             |                                              |                             |
| 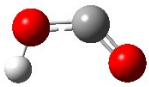   |             |             |             |                                              |                             |
| 0 2                                                                                 |             |             |             | Zero-point correction=                       | 0.020994 (Hartree/Particle) |
| C                                                                                   | 0.00000000  | 0.43650500  | 0.00000000  | Thermal correction to Energy=                | 0.024171                    |
| O                                                                                   | 1.13965100  | 0.18423500  | 0.00000000  | Thermal correction to Enthalpy=              | 0.025115                    |
| O                                                                                   | -1.04390700 | -0.35355500 | 0.00000000  | Thermal correction to Gibbs Free Energy=     | -0.003410                   |
| H                                                                                   | -0.76595600 | -1.26447700 | 0.00000000  | Sum of electronic and zero-point Energies=   | -188.873382                 |
|                                                                                     |             |             |             | Sum of electronic and thermal Energies=      | -188.870204                 |
|                                                                                     |             |             |             | Sum of electronic and thermal Enthalpies=    | -188.869260                 |
|                                                                                     |             |             |             | Sum of electronic and thermal Free Energies= | -188.897785                 |
| <b>N-methylaniline (NMA)</b>                                                        |             |             |             |                                              |                             |
|    |             |             |             |                                              |                             |
| 0 1                                                                                 |             |             |             | Zero-point correction=                       | 0.146411 (Hartree/Particle) |
| C                                                                                   | 2.30735000  | -0.34390700 | 0.02665800  | Thermal correction to Energy=                | 0.153659                    |
| C                                                                                   | 1.34845600  | -1.35233800 | -0.00705000 | Thermal correction to Enthalpy=              | 0.154603                    |
| C                                                                                   | -0.01319300 | -1.05353800 | -0.03705100 | Thermal correction to Gibbs Free Energy=     | 0.115120                    |
| C                                                                                   | -0.44636600 | 0.28443300  | -0.04209200 | Sum of electronic and zero-point Energies=   | -326.373519                 |
| C                                                                                   | 0.52985500  | 1.30066300  | -0.00576000 | Sum of electronic and thermal Energies=      | -326.366271                 |
| C                                                                                   | 1.88121400  | 0.98691500  | 0.02878800  | Sum of electronic and thermal Enthalpies=    | -326.365327                 |
| H                                                                                   | 3.36962200  | -0.58685400 | 0.05283900  | Sum of electronic and thermal Free Energies= | -326.404809                 |
| H                                                                                   | 1.65896500  | -2.39892700 | -0.00584000 |                                              |                             |
| H                                                                                   | -0.73978400 | -1.86522500 | -0.05774800 |                                              |                             |
| H                                                                                   | 0.20948000  | 2.34518800  | -0.01003800 |                                              |                             |
| H                                                                                   | 2.61439500  | 1.79514700  | 0.05706500  |                                              |                             |
| N                                                                                   | -1.78360600 | 0.61502400  | -0.10033300 |                                              |                             |
| H                                                                                   | -2.00970100 | 1.56700700  | 0.15085200  |                                              |                             |
| C                                                                                   | -2.82034400 | -0.36686100 | 0.06958500  |                                              |                             |
| H                                                                                   | -2.73812200 | -0.92336700 | 1.02214200  |                                              |                             |
| H                                                                                   | -3.79654200 | 0.13207300  | 0.04470400  |                                              |                             |
| H                                                                                   | -2.80490200 | -1.10241900 | -0.75011400 |                                              |                             |
| <b>PhSiH<sub>3</sub></b>                                                            |             |             |             |                                              |                             |
|  |             |             |             |                                              |                             |
| 0 1                                                                                 |             |             |             | Zero-point correction=                       | 0.116470 (Hartree/Particle) |
| C                                                                                   | -2.34782300 | -0.00037000 | 0.01120400  | Thermal correction to Energy=                | 0.123444                    |
| C                                                                                   | -1.64865200 | -1.20689600 | 0.00353600  | Thermal correction to Enthalpy=              | 0.124388                    |
| C                                                                                   | -0.25454700 | -1.20359100 | -0.01083400 | Thermal correction to Gibbs Free Energy=     | 0.084504                    |
| C                                                                                   | 0.46569700  | 0.00045700  | -0.01602800 | Sum of electronic and zero-point Energies=   | -522.431873                 |
| C                                                                                   | -0.25513300 | 1.20397100  | -0.01080100 | Sum of electronic and thermal Energies=      | -522.424899                 |
| C                                                                                   | -1.64942000 | 1.20641400  | 0.00349600  | Sum of electronic and thermal Enthalpies=    | -522.423955                 |
| H                                                                                   | -3.43902900 | -0.00072900 | 0.01990600  | Sum of electronic and thermal Free Energies= | -522.463839                 |
| H                                                                                   | -2.19141700 | -2.15353600 | 0.00550500  |                                              |                             |
| H                                                                                   | 0.27835100  | -2.15810100 | -0.02293300 |                                              |                             |
| H                                                                                   | 0.27733900  | 2.15865100  | -0.02284700 |                                              |                             |
| H                                                                                   | -2.19268800 | 2.15276500  | 0.00546700  |                                              |                             |

|                                                                                     |             |             |             |                                                          |
|-------------------------------------------------------------------------------------|-------------|-------------|-------------|----------------------------------------------------------|
| Si                                                                                  | 2.34513900  | 0.00008000  | 0.00665900  |                                                          |
| H                                                                                   | 2.86615700  | -0.03117400 | 1.40086400  |                                                          |
| H                                                                                   | 2.85526000  | -1.20066800 | -0.70800400 |                                                          |
| H                                                                                   | 2.85335200  | 1.23176300  | -0.65461700 |                                                          |
| <b>PhSiH<sub>2</sub>* radical</b>                                                   |             |             |             |                                                          |
| 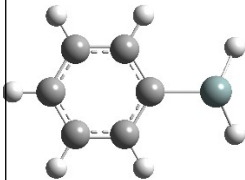   |             |             |             |                                                          |
| 0 2                                                                                 |             |             |             | Zero-point correction= 0.107117 (Hartree/Particle)       |
| C                                                                                   | 2.29599400  | 0.00007300  | 0.01176500  | Thermal correction to Energy= 0.113709                   |
| C                                                                                   | 1.59638300  | -1.20705200 | 0.00616700  | Thermal correction to Enthalpy= 0.114653                 |
| C                                                                                   | 0.20353100  | -1.20607500 | -0.00514300 | Thermal correction to Gibbs Free Energy= 0.075798        |
| C                                                                                   | -0.51917700 | -0.00008400 | -0.00565900 | Sum of electronic and zero-point Energies= -521.798350   |
| C                                                                                   | 0.20340400  | 1.20599300  | -0.00514500 | Sum of electronic and thermal Energies= -521.791758      |
| C                                                                                   | 1.59625800  | 1.20712400  | 0.00616400  | Sum of electronic and thermal Enthalpies= -521.790814    |
| H                                                                                   | 3.38707900  | 0.00012700  | 0.02098000  | Sum of electronic and thermal Free Energies= -521.829669 |
| H                                                                                   | 2.13938800  | -2.15358300 | 0.01235700  |                                                          |
| H                                                                                   | -0.33015200 | -2.16009700 | -0.00740300 |                                                          |
| H                                                                                   | -0.33037900 | 2.15995900  | -0.00740100 |                                                          |
| H                                                                                   | 2.13915900  | 2.15371500  | 0.01235400  |                                                          |
| Si                                                                                  | -2.38240000 | -0.00000800 | -0.08106600 |                                                          |
| H                                                                                   | -2.95503900 | -1.23054200 | 0.52759600  |                                                          |
| H                                                                                   | -2.95480400 | 1.23065400  | 0.52755700  |                                                          |
| <b>N-methyl-N-phenylformamide (NMPF)</b>                                            |             |             |             |                                                          |
|  |             |             |             |                                                          |
| C                                                                                   | -2.94931600 | -0.18826500 | 0.07268000  | Zero-point correction= 0.157188 (Hartree/Particle)       |
| C                                                                                   | -2.34062800 | 1.04296600  | 0.30817000  | Thermal correction to Energy= 0.165924                   |
| C                                                                                   | -0.95478700 | 1.17076000  | 0.25511200  | Thermal correction to Enthalpy= 0.166868                 |
| C                                                                                   | -0.15383600 | 0.06071500  | -0.04463500 | Thermal correction to Gibbs Free Energy= 0.123177        |
| C                                                                                   | -0.77067800 | -1.17019400 | -0.31363400 | Sum of electronic and zero-point Energies= -439.578803   |
| C                                                                                   | -2.15545800 | -1.29135800 | -0.23809400 | Sum of electronic and thermal Energies= -439.570067      |
| H                                                                                   | -4.03432400 | -0.28518400 | 0.11874100  | Sum of electronic and thermal Enthalpies= -439.569123    |
| H                                                                                   | -2.94856700 | 1.91761000  | 0.54439000  | Sum of electronic and thermal Free Energies= -439.612814 |
| H                                                                                   | -0.49125700 | 2.13588100  | 0.45892900  |                                                          |
| H                                                                                   | -0.16811500 | -2.02797300 | -0.61247800 |                                                          |
| H                                                                                   | -2.61819400 | -2.25666800 | -0.44875000 |                                                          |
| N                                                                                   | 1.25021200  | 0.19308100  | -0.09848800 |                                                          |
| C                                                                                   | 1.84972800  | 1.45549700  | -0.49417100 |                                                          |
| H                                                                                   | 1.84165800  | 2.18806900  | 0.32816400  |                                                          |
| H                                                                                   | 2.89123800  | 1.25840300  | -0.76958800 |                                                          |
| H                                                                                   | 1.30467800  | 1.87157100  | -1.35130100 |                                                          |
| C                                                                                   | 2.08342500  | -0.81280000 | 0.33014100  |                                                          |
| O                                                                                   | 3.28671600  | -0.75844400 | 0.30561800  |                                                          |
| H                                                                                   | 1.52696800  | -1.68965300 | 0.72294600  |                                                          |
| <b>Zn@His-POP</b>                                                                   |             |             |             |                                                          |

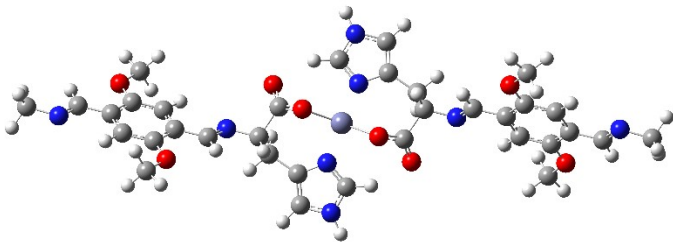

|     |              |             |             |
|-----|--------------|-------------|-------------|
| 0 1 |              |             |             |
| N   | 12.07466400  | -0.10798700 | 1.57720200  |
| C   | 11.30103700  | -0.56356000 | 0.68223300  |
| H   | 11.66102000  | -1.22467400 | -0.12515300 |
| C   | 9.86081400   | -0.24001900 | 0.65847600  |
| C   | 9.31526400   | 0.58510900  | 1.64573200  |
| C   | 9.03222400   | -0.76236400 | -0.35390400 |
| C   | 7.95787400   | 0.90092400  | 1.64351500  |
| H   | 10.00338200  | 0.95889600  | 2.40288700  |
| C   | 7.67485900   | -0.44552900 | -0.35708800 |
| C   | 7.13028300   | 0.37952400  | 0.63010000  |
| H   | 6.98351700   | -0.82416500 | -1.10930600 |
| C   | 5.68831300   | 0.69424100  | 0.60754600  |
| H   | 5.30071000   | 1.26788300  | 1.46652700  |
| N   | 4.94435700   | 0.31620200  | -0.34767600 |
| O   | 9.62050800   | -1.55967100 | -1.27918700 |
| O   | 7.36696200   | 1.69599000  | 2.56894600  |
| C   | 8.81244700   | -2.10794600 | -2.28771500 |
| H   | 8.01687200   | -2.74328700 | -1.86587900 |
| H   | 8.34737200   | -1.32099400 | -2.90360800 |
| H   | 9.46812900   | -2.71907600 | -2.91770700 |
| C   | 8.16145900   | 2.20616500  | 3.60672500  |
| H   | 7.49988200   | 2.80134000  | 4.24569500  |
| H   | 8.61181400   | 1.39680700  | 4.20434600  |
| H   | 8.96714000   | 2.85055600  | 3.21831800  |
| C   | 3.54238700   | 0.64353200  | -0.28592300 |
| H   | 3.29017700   | 1.27539700  | 0.58537800  |
| C   | 2.69481400   | -0.64688400 | -0.21335700 |
| O   | 1.65059600   | -0.56438700 | 0.53755900  |
| O   | 3.00299800   | -1.60194300 | -0.90639400 |
| C   | 3.16941400   | 1.37367200  | -1.59861500 |
| H   | 3.99434800   | 2.05604300  | -1.84564700 |
| H   | 3.13416900   | 0.61533400  | -2.39688500 |
| C   | 1.91179800   | 2.18658600  | -1.56879400 |
| C   | 1.79605900   | 3.52268300  | -1.85454800 |
| N   | 0.46329700   | 3.83242900  | -1.71418300 |
| H   | 2.54324600   | 4.25514100  | -2.14123600 |
| C   | -0.19537300  | 2.72015000  | -1.34921300 |
| H   | 0.03835500   | 4.74075100  | -1.84895600 |
| H   | -1.27168500  | 2.65466900  | -1.14878800 |
| N   | 0.65129400   | 1.70789100  | -1.26158800 |
| Zn  | -0.00000400  | 0.00003500  | -0.28953000 |
| N   | -12.07465400 | 0.10776700  | 1.57723200  |
| C   | -11.30105100 | 0.56343300  | 0.68229000  |
| H   | -11.66103700 | 1.22460900  | -0.12504600 |
| C   | -9.86082100  | 0.23992200  | 0.65849800  |
| C   | -9.31524800  | -0.58525200 | 1.64570200  |
| C   | -9.03224900  | 0.76234100  | -0.35385900 |
| C   | -7.95785200  | -0.90104200 | 1.64345600  |
| H   | -10.00335500 | -0.95909400 | 2.40284000  |
| C   | -7.67487800  | 0.44553300  | -0.35707100 |
| C   | -7.13027800  | -0.37956800 | 0.63006500  |
| H   | -6.98354900  | 0.82422500  | -1.10927400 |
| C   | -5.68830300  | -0.69426000 | 0.60748300  |
| H   | -5.30068900  | -1.26795400 | 1.46642400  |
| N   | -4.94435700  | -0.31614700 | -0.34771700 |
| O   | -9.62055600  | 1.55968900  | -1.27909100 |
| O   | -7.36691800  | -1.69615100 | 2.56883600  |
| C   | -8.81251400  | 2.10803100  | -2.28759800 |
| H   | -8.01694800  | 2.74336600  | -1.86573700 |
| H   | -8.34743000  | 1.32112000  | -2.90353700 |
| H   | -9.46821400  | 2.71918200  | -2.91755300 |
| C   | -8.16139400  | -2.20639100 | 3.60659900  |
| H   | -7.49980100  | -2.80159000 | 4.24552900  |

|                                              |                             |
|----------------------------------------------|-----------------------------|
| Zero-point correction=                       | 0.711308 (Hartree/Particle) |
| Thermal correction to Energy=                | 0.761624                    |
| Thermal correction to Enthalpy=              | 0.762568                    |
| Thermal correction to Gibbs Free Energy=     | 0.617487                    |
| Sum of electronic and zero-point Energies=   | -4134.099331                |
| Sum of electronic and thermal Energies=      | -4134.049015                |
| Sum of electronic and thermal Enthalpies=    | -4134.048071                |
| Sum of electronic and thermal Free Energies= | -4134.193152                |

|   |              |             |             |
|---|--------------|-------------|-------------|
| H | -8.61175200  | -1.39707100 | 4.20426700  |
| H | -8.96707100  | -2.85077400 | 3.21816900  |
| C | -3.54238300  | -0.64347000 | -0.28599200 |
| H | -3.29016500  | -1.27538900 | 0.58526700  |
| C | -2.69481900  | 0.64694700  | -0.21334500 |
| O | -1.65060800  | 0.56441600  | 0.53757900  |
| O | -3.00300000  | 1.60204300  | -0.90633200 |
| C | -3.16940900  | -1.37352100 | -1.59873300 |
| H | -3.99434100  | -2.05587800 | -1.84581100 |
| H | -3.13416500  | -0.61512900 | -2.39695300 |
| C | -1.91179100  | -2.18643300 | -1.56896200 |
| C | -1.79604600  | -3.52250800 | -1.85481400 |
| N | -0.46328600  | -3.83226300 | -1.71445500 |
| H | -2.54322800  | -4.25494700 | -2.14156500 |
| C | 0.19537800   | -2.72000900 | -1.34939400 |
| H | -0.03834000  | -4.74057400 | -1.84929000 |
| H | 1.27168700   | -2.65454200 | -1.14894900 |
| N | -0.65129200  | -1.70775900 | -1.26170400 |
| C | 13.46534900  | -0.47500200 | 1.52522400  |
| H | 13.74746700  | -0.97653200 | 2.46356500  |
| H | 13.71756000  | -1.13844400 | 0.67713200  |
| H | 14.08248100  | 0.43408800  | 1.46003500  |
| C | -13.46534900 | 0.47475100  | 1.52532300  |
| H | -13.74752400 | 0.97597700  | 2.46380400  |
| H | -13.71754300 | 1.13847500  | 0.67746200  |
| H | -14.08248300 | -0.43432900 | 1.45977600  |

### R1 complex

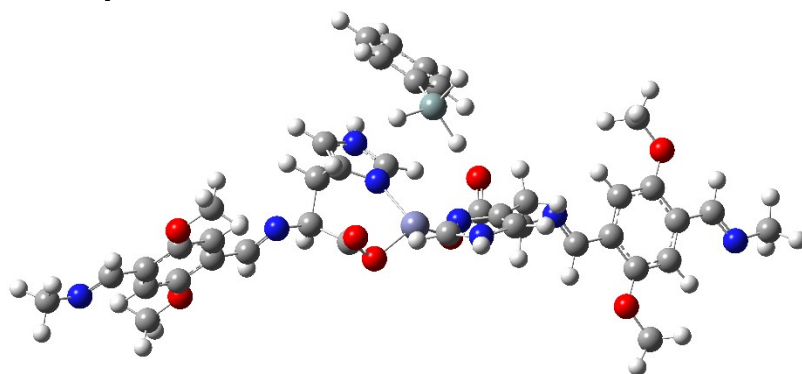

|     |             |             |             |                                              |                             |
|-----|-------------|-------------|-------------|----------------------------------------------|-----------------------------|
| 0 1 |             |             |             | Zero-point correction=                       | 0.829438 (Hartree/Particle) |
| N   | 11.99924400 | -1.66753300 | -1.21757000 | Thermal correction to Energy=                | 0.888145                    |
| C   | 11.21883000 | -0.73673200 | -0.85503500 | Thermal correction to Enthalpy=              | 0.889089                    |
| H   | 11.57394300 | 0.29368400  | -0.68007600 | Thermal correction to Gibbs Free Energy=     | 0.725674                    |
| C   | 9.77644300  | -0.96851100 | -0.64141900 | Sum of electronic and zero-point Energies=   | -4656.549126                |
| C   | 9.23745300  | -2.24163700 | -0.84527800 | Sum of electronic and thermal Energies=      | -4656.490419                |
| C   | 8.93950800  | 0.08914600  | -0.23493600 | Sum of electronic and thermal Enthalpies=    | -4656.489475                |
| C   | 7.87847100  | -2.48228400 | -0.65107200 | Sum of electronic and thermal Free Energies= | -4656.652890                |
| H   | 9.93196000  | -3.01979400 | -1.15927900 |                                              |                             |
| C   | 7.58062200  | -0.15140700 | -0.03975600 |                                              |                             |
| C   | 7.04241400  | -1.42466500 | -0.24331800 |                                              |                             |
| H   | 6.88364100  | 0.62698600  | 0.26894100  |                                              |                             |
| C   | 5.59953300  | -1.65293500 | -0.03229000 |                                              |                             |
| H   | 5.22315800  | -2.65870000 | -0.28468300 |                                              |                             |
| N   | 4.84241800  | -0.73671900 | 0.41113800  |                                              |                             |
| O   | 9.52209000  | 1.30044800  | -0.05765600 |                                              |                             |
| O   | 7.29425100  | -3.69235400 | -0.82881400 |                                              |                             |
| C   | 8.70721600  | 2.37385300  | 0.33480200  |                                              |                             |
| H   | 7.91889700  | 2.57425200  | -0.40889900 |                                              |                             |
| H   | 8.23242000  | 2.18328100  | 1.31111000  |                                              |                             |
| H   | 9.35961700  | 3.25024600  | 0.41572000  |                                              |                             |
| C   | 8.09955200  | -4.75945300 | -1.25509500 |                                              |                             |
| H   | 7.44284600  | -5.63140900 | -1.34758100 |                                              |                             |
| H   | 8.56303200  | -4.54865600 | -2.23269900 |                                              |                             |
| H   | 8.89568100  | -4.98012300 | -0.52527700 |                                              |                             |
| C   | 3.44178400  | -1.03572000 | 0.57600500  |                                              |                             |
| H   | 3.20105800  | -2.08988500 | 0.34768000  |                                              |                             |
| C   | 2.59179100  | -0.13687100 | -0.34894700 |                                              |                             |
| O   | 1.58426400  | -0.72441100 | -0.89331300 |                                              |                             |
| O   | 2.86480400  | 1.05039700  | -0.44797200 |                                              |                             |
| C   | 3.06104300  | -0.70530000 | 2.03573600  |                                              |                             |
| H   | 3.85673600  | -1.09724100 | 2.68459800  |                                              |                             |

|            |              |             |             |
|------------|--------------|-------------|-------------|
| H          | 3.08298100   | 0.39177000  | 2.13414100  |
| C          | 1.76461100   | -1.26770000 | 2.53515800  |
| C          | 1.59572000   | -2.01260500 | 3.67418900  |
| N          | 0.25302600   | -2.29636100 | 3.75437400  |
| H          | 2.31431400   | -2.35181500 | 4.41280300  |
| C          | -0.36158700  | -1.74778400 | 2.69357900  |
| H          | -0.20738900  | -2.83615700 | 4.47579700  |
| H          | -1.43513700  | -1.81893100 | 2.47872700  |
| N          | 0.52300000   | -1.11200400 | 1.94262900  |
| Zn         | -0.10178100  | -0.52712000 | 0.04910800  |
| N          | -12.26347000 | -1.53584300 | -0.99414300 |
| C          | -11.46301500 | -1.23318400 | -0.05887200 |
| H          | -11.80253000 | -1.08767600 | 0.98137700  |
| C          | -10.01726000 | -1.05399700 | -0.29760600 |
| C          | -9.49633700  | -1.22561600 | -1.58312600 |
| C          | -9.15860700  | -0.71345700 | 0.76579800  |
| C          | -8.13444100  | -1.06327000 | -1.83009900 |
| H          | -10.20709700 | -1.48908400 | -2.36536100 |
| C          | -7.79661000  | -0.54995700 | 0.51873600  |
| C          | -7.27679800  | -0.72085000 | -0.76669400 |
| H          | -7.08257200  | -0.29418500 | 1.30094600  |
| C          | -5.82953900  | -0.54645000 | -0.99978100 |
| H          | -5.46569500  | -0.78882300 | -2.01276300 |
| N          | -5.05582100  | -0.14536300 | -0.07846500 |
| O          | -9.72390000  | -0.56575900 | 1.98924100  |
| O          | -7.56654300  | -1.21271200 | -3.05205200 |
| C          | -8.88688000  | -0.23939200 | 3.06790300  |
| H          | -8.11960900  | -1.01342200 | 3.23139000  |
| H          | -8.38436300  | 0.72870300  | 2.90916800  |
| H          | -9.52811700  | -0.17234400 | 3.95368800  |
| C          | -8.39250600  | -1.58257600 | -4.12410900 |
| H          | -7.74642900  | -1.66487400 | -5.00503100 |
| H          | -8.88087500  | -2.55348700 | -3.94001300 |
| H          | -9.17038100  | -0.82487700 | -4.31401100 |
| C          | -3.65168900  | -0.02090800 | -0.37751400 |
| H          | -3.42565100  | -0.20386500 | -1.44419400 |
| C          | -2.83351200  | -1.02096400 | 0.47117300  |
| O          | -1.77653200  | -1.48296000 | -0.10450500 |
| O          | -3.17554400  | -1.24933400 | 1.61912200  |
| C          | -3.20774500  | 1.41057200  | 0.01868200  |
| H          | -4.03137900  | 2.09317300  | -0.23130600 |
| H          | -3.09725500  | 1.43577600  | 1.11504600  |
| C          | -1.97728800  | 1.92317000  | -0.66060500 |
| C          | -1.86772200  | 3.04356300  | -1.44362200 |
| N          | -0.56061500  | 3.09487300  | -1.86557500 |
| H          | -2.60521600  | 3.78714000  | -1.72689100 |
| C          | 0.09384300   | 2.04935700  | -1.34031900 |
| H          | -0.11822100  | 3.85803000  | -2.36615800 |
| H          | 1.15944000   | 1.83869800  | -1.46274900 |
| N          | -0.73226500  | 1.32359100  | -0.60461300 |
| C          | 13.39160300  | -1.35433400 | -1.40361600 |
| H          | 13.68697200  | -1.59650800 | -2.43592900 |
| H          | 13.63893700  | -0.29562200 | -1.20136300 |
| H          | 14.00203500  | -1.99285200 | -0.74693500 |
| C          | -13.65753500 | -1.69199400 | -0.67242100 |
| H          | -13.98664900 | -2.70503600 | -0.94996300 |
| H          | -13.88783100 | -1.52304200 | 0.39597100  |
| H          | -14.25444600 | -0.99346900 | -1.27852900 |
| C          | 1.13966400   | 6.07945300  | -1.08118800 |
| C          | -0.01759500  | 6.11144400  | -0.30161800 |
| C          | -0.21608300  | 5.14697400  | 0.68777300  |
| C          | 0.73136700   | 4.13800900  | 0.91245300  |
| C          | 1.89400800   | 4.12017600  | 0.12319400  |
| C          | 2.09579900   | 5.08367400  | -0.86599300 |
| H          | 1.30051200   | 6.83578400  | -1.85208200 |
| H          | -0.76542000  | 6.89008300  | -0.46327600 |
| H          | -1.13391700  | 5.17596200  | 1.28144100  |
| H          | 2.62405500   | 3.31369100  | 0.24200300  |
| H          | 3.00165400   | 5.05298900  | -1.47418100 |
| Si         | 0.45061100   | 2.79768300  | 2.20330000  |
| H          | 0.92553700   | 3.24237800  | 3.54336800  |
| H          | -1.00178600  | 2.48585800  | 2.30921200  |
| H          | 1.21049400   | 1.58739400  | 1.80472900  |
| <b>TS1</b> |              |             |             |

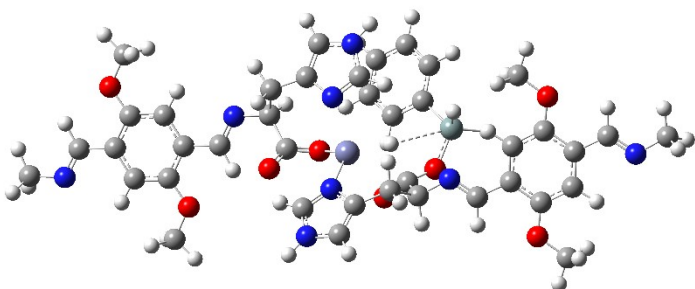

|     |              |             |             |                                              |                             |
|-----|--------------|-------------|-------------|----------------------------------------------|-----------------------------|
| 0 1 |              |             |             | Zero-point correction=                       | 0.827960 (Hartree/Particle) |
| N   | 11.58076700  | 0.18439500  | -0.32929300 | Thermal correction to Energy=                | 0.885170                    |
| C   | 10.54981100  | 0.71898300  | 0.17813700  | Thermal correction to Enthalpy=              | 0.886114                    |
| H   | 10.58512400  | 1.69495200  | 0.69249500  | Thermal correction to Gibbs Free Energy=     | 0.728021                    |
| C   | 9.22542300   | 0.06836600  | 0.11427300  | Sum of electronic and zero-point Energies=   | -4656.514705                |
| C   | 9.08553100   | -1.16617500 | -0.52446000 | Sum of electronic and thermal Energies=      | -4656.457495                |
| C   | 8.10105100   | 0.68823200  | 0.69404600  | Sum of electronic and thermal Enthalpies=    | -4656.456551                |
| C   | 7.84440700   | -1.79697500 | -0.59940000 | Sum of electronic and thermal Free Energies= | -4656.614644                |
| H   | 9.98885700   | -1.59714900 | -0.95424800 |                                              |                             |
| C   | 6.86113700   | 0.05662400  | 0.62310000  |                                              |                             |
| C   | 6.72007200   | -1.17601400 | -0.02097100 |                                              |                             |
| H   | 5.95909900   | 0.48735400  | 1.05603000  |                                              |                             |
| C   | 5.39273000   | -1.81283100 | -0.10540100 |                                              |                             |
| H   | 5.34516800   | -2.77001600 | -0.65113500 |                                              |                             |
| N   | 4.36354700   | -1.27584500 | 0.40801200  |                                              |                             |
| O   | 8.30140600   | 1.88620000  | 1.29655600  |                                              |                             |
| O   | 7.64173500   | -2.99141400 | -1.20392200 |                                              |                             |
| C   | 7.19119500   | 2.53645100  | 1.85588900  |                                              |                             |
| H   | 6.41954800   | 2.74064100  | 1.09521400  |                                              |                             |
| H   | 6.74014500   | 1.93988600  | 2.66585000  |                                              |                             |
| H   | 7.55587300   | 3.48445200  | 2.26652600  |                                              |                             |
| C   | 8.73728800   | -3.61844600 | -1.81846100 |                                              |                             |
| H   | 8.36124600   | -4.55018300 | -2.25468300 |                                              |                             |
| H   | 9.16404900   | -2.98982600 | -2.61675500 |                                              |                             |
| H   | 9.52880700   | -3.85249400 | -1.08802000 |                                              |                             |
| C   | 3.09298400   | -1.93248400 | 0.24235500  |                                              |                             |
| H   | 3.19046200   | -2.90921200 | -0.27494300 |                                              |                             |
| C   | 2.17330500   | -1.13754600 | -0.72320300 |                                              |                             |
| O   | 1.13439500   | -1.66736800 | -1.13394500 |                                              |                             |
| O   | 2.88021000   | -0.33668700 | -1.57894500 |                                              |                             |
| C   | 2.49756100   | -2.15855900 | 1.64210400  |                                              |                             |
| H   | 3.20942400   | -2.78467500 | 2.19793000  |                                              |                             |
| H   | 2.46692500   | -1.17920500 | 2.14143900  |                                              |                             |
| C   | 1.14914600   | -2.79933200 | 1.70811800  |                                              |                             |
| C   | 0.82960600   | -4.08897900 | 2.04109600  |                                              |                             |
| N   | -0.54134000  | -4.17185200 | 1.95469400  |                                              |                             |
| H   | 1.45276200   | -4.92942000 | 2.32774000  |                                              |                             |
| C   | -1.01776900  | -2.96986100 | 1.58236200  |                                              |                             |
| H   | -1.10586500  | -4.99279400 | 2.12861000  |                                              |                             |
| H   | -2.06145700  | -2.72366700 | 1.38527800  |                                              |                             |
| N   | -0.02129100  | -2.11970900 | 1.43973800  |                                              |                             |
| Zn  | -0.01551700  | -0.35746300 | 0.36714200  |                                              |                             |
| N   | -11.93681700 | -1.43636700 | -0.63637200 |                                              |                             |
| C   | -11.32824600 | -0.41134200 | -0.20487800 |                                              |                             |
| H   | -11.86580100 | 0.46134300  | 0.20531600  |                                              |                             |
| C   | -9.85556200  | -0.31324500 | -0.22139700 |                                              |                             |
| C   | -9.09096900  | -1.36865100 | -0.72583000 |                                              |                             |
| C   | -9.21464800  | 0.84091300  | 0.26835500  |                                              |                             |
| C   | -7.69898300  | -1.29655100 | -0.75049700 |                                              |                             |
| H   | -9.63931800  | -2.23527500 | -1.09277600 |                                              |                             |
| C   | -7.82298700  | 0.91239600  | 0.24348900  |                                              |                             |
| C   | -7.05716700  | -0.14271900 | -0.25806100 |                                              |                             |
| H   | -7.27312900  | 1.77897300  | 0.60797500  |                                              |                             |
| C   | -5.58109400  | -0.04854000 | -0.27625300 |                                              |                             |
| H   | -5.04768700  | -0.93353200 | -0.64789600 |                                              |                             |
| N   | -4.99579100  | 1.00145700  | 0.13090700  |                                              |                             |
| O   | -10.01173900 | 1.83150200  | 0.74346400  |                                              |                             |
| O   | -6.90423300  | -2.28279700 | -1.22955000 |                                              |                             |
| C   | -9.39869500  | 2.99393200  | 1.23255900  |                                              |                             |
| H   | -8.73958700  | 2.77331900  | 2.08832200  |                                              |                             |
| H   | -8.80664900  | 3.49741200  | 0.45066400  |                                              |                             |
| H   | -10.20410400 | 3.66059900  | 1.56037800  |                                              |                             |
| C   | -7.51366500  | -3.44257900 | -1.72883000 |                                              |                             |

|    |              |             |             |
|----|--------------|-------------|-------------|
| H  | -6.70555800  | -4.10279100 | -2.06229400 |
| H  | -8.10444100  | -3.95474000 | -0.95146400 |
| H  | -8.17306000  | -3.21640000 | -2.58293600 |
| C  | -3.55510100  | 1.11405800  | 0.08080600  |
| H  | -3.29822700  | 1.79925100  | -0.74300200 |
| C  | -2.71577400  | -0.16556900 | -0.05249500 |
| O  | -1.62688500  | -0.01906200 | -0.71220600 |
| O  | -3.04986900  | -1.15613600 | 0.58958300  |
| C  | -3.08573500  | 1.75752100  | 1.40782600  |
| H  | -3.78018100  | 2.57857900  | 1.63148500  |
| H  | -3.20551100  | 0.99835100  | 2.19651000  |
| C  | -1.69153200  | 2.30355800  | 1.40824100  |
| C  | -1.34812800  | 3.63141800  | 1.45789500  |
| N  | 0.02369200   | 3.67356500  | 1.44057900  |
| H  | -1.96376200  | 4.52372800  | 1.50459500  |
| C  | 0.47182900   | 2.40784000  | 1.37177200  |
| H  | 0.60269600   | 4.50075300  | 1.37977000  |
| H  | 1.52384500   | 2.13810400  | 1.29526500  |
| N  | -0.53000700  | 1.55334600  | 1.36216700  |
| C  | 12.83334100  | 0.88556000  | -0.22469500 |
| H  | 13.23632200  | 1.06688500  | -1.23270800 |
| H  | 12.75772400  | 1.85142800  | 0.30832100  |
| H  | 13.56652700  | 0.24976700  | 0.29450500  |
| C  | -13.37489800 | -1.44600700 | -0.58301800 |
| H  | -13.71443800 | -2.30724700 | 0.01251900  |
| H  | -13.80920300 | -0.52355300 | -0.15439600 |
| H  | -13.77873900 | -1.58970900 | -1.59689400 |
| C  | -0.31522200  | 4.02004800  | -1.89881400 |
| C  | 0.94156000   | 4.58625100  | -1.67044700 |
| C  | 2.05963300   | 3.76329000  | -1.53407100 |
| C  | 1.94477000   | 2.36939600  | -1.64836600 |
| C  | 0.68100500   | 1.81952000  | -1.90581700 |
| C  | -0.44619200  | 2.63635300  | -2.01133800 |
| H  | -1.19460900  | 4.66067500  | -1.99088800 |
| H  | 1.04872500   | 5.67115200  | -1.60073300 |
| H  | 3.03622000   | 4.21989100  | -1.34223900 |
| H  | 0.56724700   | 0.73618900  | -2.02495700 |
| H  | -1.41813000  | 2.16878600  | -2.17327100 |
| Si | 3.40931600   | 1.23509800  | -1.35869000 |
| H  | 4.48001800   | 1.43584600  | -2.36553700 |
| H  | 3.96426300   | 1.52225200  | -0.00871100 |
| H  | 1.72785900   | 0.04718200  | 0.36953800  |

### P1 complex

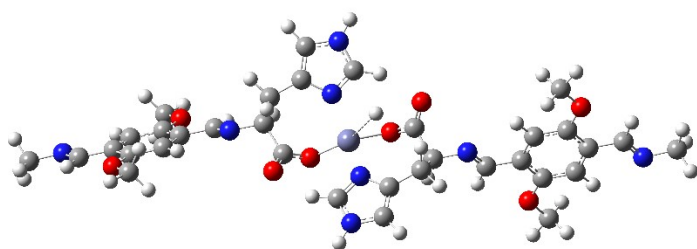

|     |             |             |             |                                              |                             |
|-----|-------------|-------------|-------------|----------------------------------------------|-----------------------------|
| 0 2 |             |             |             | Zero-point correction=                       | 0.713653 (Hartree/Particle) |
| N   | 12.02553300 | -0.99872000 | 1.41530600  | Thermal correction to Energy=                | 0.765050                    |
| C   | 11.26979200 | -0.90731900 | 0.40165300  | Thermal correction to Enthalpy=              | 0.765995                    |
| H   | 11.64354800 | -1.05836500 | -0.62597900 | Thermal correction to Gibbs Free Energy=     | 0.619432                    |
| C   | 9.83307200  | -0.59155000 | 0.52652000  | Sum of electronic and zero-point Energies=   | -4134.597330                |
| C   | 9.27040000  | -0.39128600 | 1.79002100  | Sum of electronic and thermal Energies=      | -4134.545932                |
| C   | 9.02492300  | -0.49411300 | -0.62310000 | Sum of electronic and thermal Enthalpies=    | -4134.544988                |
| C   | 7.91592100  | -0.09452800 | 1.93061400  | Sum of electronic and thermal Free Energies= | -4134.691551                |
| H   | 9.94315400  | -0.47960400 | 2.64213600  |                                              |                             |
| C   | 7.67057300  | -0.19620500 | -0.48278700 |                                              |                             |
| C   | 7.10880500  | 0.00415600  | 0.78061600  |                                              |                             |
| H   | 6.99450100  | -0.11432700 | -1.33327400 |                                              |                             |
| C   | 5.67020300  | 0.31251700  | 0.90090200  |                                              |                             |
| H   | 5.26698400  | 0.36911200  | 1.92623000  |                                              |                             |
| N   | 4.94634300  | 0.49417100  | -0.12470000 |                                              |                             |
| O   | 9.62889400  | -0.70369100 | -1.81863200 |                                              |                             |
| O   | 7.30942700  | 0.11336700  | 3.12502800  |                                              |                             |
| C   | 8.84141400  | -0.62783100 | -2.97827000 |                                              |                             |
| H   | 8.03040700  | -1.37390700 | -2.96432800 |                                              |                             |
| H   | 8.39821800  | 0.37405900  | -3.09944100 |                                              |                             |
| H   | 9.50734000  | -0.83258300 | -3.82379500 |                                              |                             |

|                   |              |             |             |
|-------------------|--------------|-------------|-------------|
| C                 | 8.08339100   | -0.00590500 | 4.28918900  |
| H                 | 7.41177300   | 0.18266700  | 5.13391600  |
| H                 | 8.51300500   | -1.01643900 | 4.38547600  |
| H                 | 8.90318700   | 0.73090200  | 4.30559800  |
| C                 | 3.54558100   | 0.76939000  | 0.07189900  |
| H                 | 3.27529600   | 0.86890800  | 1.13901400  |
| C                 | 2.68761900   | -0.35815200 | -0.54458900 |
| O                 | 1.63903900   | -0.67035400 | 0.13594100  |
| O                 | 2.99244300   | -0.80892700 | -1.63658200 |
| C                 | 3.21094600   | 2.07366600  | -0.68828900 |
| H                 | 4.02774300   | 2.78592300  | -0.50691100 |
| H                 | 3.22817700   | 1.83451100  | -1.76346500 |
| C                 | 1.93138900   | 2.75441600  | -0.30936200 |
| C                 | 1.79036800   | 4.05494700  | 0.10313200  |
| N                 | 0.44462500   | 4.24983800  | 0.31040700  |
| H                 | 2.52823000   | 4.83527900  | 0.25691000  |
| C                 | -0.19736600  | 3.10223400  | 0.03832400  |
| H                 | 0.00047700   | 5.10304600  | 0.62450900  |
| H                 | -1.27930500  | 2.94292600  | 0.12403700  |
| N                 | 0.67328200   | 2.18265900  | -0.34524000 |
| Zn                | -0.00501700  | 0.21951800  | -0.35745500 |
| N                 | -12.01024500 | -0.74643500 | 1.59629400  |
| C                 | -11.26999300 | 0.06470900  | 0.96298000  |
| H                 | -11.66194000 | 0.99872400  | 0.52420700  |
| C                 | -9.82805800  | -0.18494600 | 0.76807400  |
| C                 | -9.24260200  | -1.33915300 | 1.29556800  |
| C                 | -9.03788700  | 0.73755500  | 0.05468500  |
| C                 | -7.88281100  | -1.59286400 | 1.12525800  |
| H                 | -9.90209400  | -2.01549500 | 1.83788800  |
| C                 | -7.67819400  | 0.48351300  | -0.11655400 |
| C                 | -7.09365800  | -0.67061300 | 0.41089700  |
| H                 | -7.01530800  | 1.16229600  | -0.65219800 |
| C                 | -5.64967100  | -0.91127200 | 0.22083700  |
| H                 | -5.22829500  | -1.78885300 | 0.73990100  |
| N                 | -4.94155800  | -0.14122300 | -0.49636800 |
| O                 | -9.66370200  | 1.83910300  | -0.42780800 |
| O                 | -7.25427500  | -2.69254700 | 1.60822300  |
| C                 | -8.89437300  | 2.78158900  | -1.12831200 |
| H                 | -8.09208900  | 3.19642500  | -0.49682800 |
| H                 | -8.44146500  | 2.34065400  | -2.03126500 |
| H                 | -9.57633500  | 3.58682800  | -1.42289900 |
| C                 | -8.00960500  | -3.61406900 | 2.34907800  |
| H                 | -7.32188600  | -4.40962800 | 2.65617300  |
| H                 | -8.44805200  | -3.14676300 | 3.24597600  |
| H                 | -8.82124800  | -4.04952100 | 1.74342300  |
| C                 | -3.53378000  | -0.42594400 | -0.61578000 |
| H                 | -3.24406200  | -1.36567400 | -0.11088800 |
| C                 | -2.70589600  | 0.72733600  | -0.00386000 |
| O                 | -1.65479700  | 0.35370200  | 0.64033000  |
| O                 | -3.03382300  | 1.88191000  | -0.22420900 |
| C                 | -3.19788600  | -0.50356300 | -2.12239400 |
| H                 | -4.00703000  | -1.06062400 | -2.61495300 |
| H                 | -3.23767000  | 0.52547500  | -2.51563300 |
| C                 | -1.91014300  | -1.17718100 | -2.48984700 |
| C                 | -1.76297600  | -2.20461000 | -3.38639400 |
| N                 | -0.41921300  | -2.49446700 | -3.42525500 |
| H                 | -2.49676600  | -2.73572100 | -3.98344700 |
| C                 | 0.21699600   | -1.67402500 | -2.57333200 |
| H                 | 0.02712500   | -3.20884700 | -3.98583900 |
| H                 | 1.29554600   | -1.67227500 | -2.37447300 |
| N                 | -0.65513000  | -0.86220500 | -1.99933800 |
| C                 | 13.41420300  | -1.31125300 | 1.20261100  |
| H                 | 13.67036300  | -2.23236100 | 1.74806600  |
| H                 | 13.68130100  | -1.44220700 | 0.13745500  |
| H                 | 14.03957500  | -0.51226100 | 1.62936700  |
| C                 | -13.40537800 | -0.42367400 | 1.74036900  |
| H                 | -13.66252200 | -0.37803300 | 2.80965800  |
| H                 | -13.69070800 | 0.53295300  | 1.26446400  |
| H                 | -14.01545300 | -1.23105600 | 1.30733500  |
| H                 | -1.35625700  | 1.88664800  | -2.29065400 |
| <b>R2 complex</b> |              |             |             |

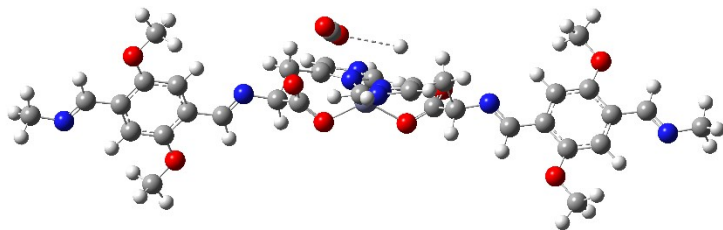

|     |              |             |             |
|-----|--------------|-------------|-------------|
| 0 2 |              |             |             |
| N   | -12.16722900 | 0.39519800  | -1.11802500 |
| C   | -11.31583400 | -0.29403600 | -0.48002800 |
| H   | -11.59848900 | -1.19386300 | 0.09347900  |
| C   | -9.88292700  | 0.06098900  | -0.46017100 |
| C   | -9.43249100  | 1.18145900  | -1.16359800 |
| C   | -8.96612300  | -0.72691300 | 0.26300700  |
| C   | -8.08393500  | 1.53333300  | -1.15993800 |
| H   | -10.18628800 | 1.75204600  | -1.70463600 |
| C   | -7.61765800  | -0.37428500 | 0.26794800  |
| C   | -7.16815400  | 0.74618500  | -0.43518000 |
| H   | -6.86116100  | -0.94766200 | 0.80272500  |
| C   | -5.73330100  | 1.09284600  | -0.41801600 |
| H   | -5.42484100  | 1.92730900  | -1.07059600 |
| N   | -4.90899600  | 0.45573200  | 0.30519600  |
| O   | -9.46455200  | -1.80286600 | 0.91989700  |
| O   | -7.58271900  | 2.60725500  | -1.81821100 |
| C   | -8.56854300  | -2.61316900 | 1.63511900  |
| H   | -7.80196400  | -3.04796500 | 0.97343600  |
| H   | -8.06508100  | -2.04725500 | 2.43583800  |
| H   | -9.16156600  | -3.41934100 | 2.08080400  |
| C   | -8.46844600  | 3.39502700  | -2.56887100 |
| H   | -7.87072300  | 4.19079800  | -3.02676800 |
| H   | -8.95797000  | 2.80637200  | -3.36189600 |
| H   | -9.24610200  | 3.84632800  | -1.93109400 |
| C   | -3.52045000  | 0.83699400  | 0.25170300  |
| H   | -3.34154700  | 1.71885000  | -0.39010100 |
| C   | -2.66219800  | -0.32582900 | -0.28634200 |
| O   | -1.63997300  | 0.04373400  | -0.97033600 |
| O   | -2.93354500  | -1.47971900 | 0.02062200  |
| C   | -3.06578300  | 1.13503100  | 1.70013400  |
| H   | -3.84563000  | 1.75516600  | 2.16389200  |
| H   | -3.05549000  | 0.17718600  | 2.24161700  |
| C   | -1.76246800  | 1.85288800  | 1.88546600  |
| C   | -1.57703300  | 3.02337300  | 2.57713400  |
| N   | -0.22701300  | 3.28333000  | 2.54347300  |
| H   | -2.28732900  | 3.66907800  | 3.08278200  |
| C   | 0.37552900   | 2.30443400  | 1.84769600  |
| H   | 0.24490300   | 4.07538100  | 2.96006600  |
| H   | 1.45086900   | 2.23484200  | 1.64248500  |
| N   | -0.52483300  | 1.42557000  | 1.44327000  |
| Zn  | 0.05258700   | 0.07051600  | -0.00505700 |
| N   | 12.34000000  | 0.72936200  | -0.74046000 |
| C   | 11.46430700  | 0.63947800  | 0.17174100  |
| H   | 11.72038600  | 0.71908900  | 1.24255800  |
| C   | 10.03709800  | 0.42132800  | -0.13624300 |
| C   | 9.61874500   | 0.31464800  | -1.46554200 |
| C   | 9.09319900   | 0.32350000  | 0.90475700  |
| C   | 8.27594300   | 0.11109300  | -1.77805900 |
| H   | 10.39235700  | 0.39868400  | -2.22776400 |
| C   | 7.75036500   | 0.11902100  | 0.59228400  |
| C   | 7.33310200   | 0.01170600  | -0.73659400 |
| H   | 6.97330200   | 0.04390100  | 1.35227200  |
| C   | 5.90310100   | -0.19746400 | -1.03806100 |
| H   | 5.61879000   | -0.16334800 | -2.10371400 |
| N   | 5.05677800   | -0.39657800 | -0.11525500 |
| O   | 9.56110900   | 0.44049500  | 2.17178600  |
| O   | 7.80484400   | -0.00369800 | -3.04421300 |
| C   | 8.63768100   | 0.36211500  | 3.22625000  |
| H   | 7.87879900   | 1.15830600  | 3.15756600  |
| H   | 8.12592000   | -0.61398600 | 3.24162400  |
| H   | 9.20865100   | 0.48485500  | 4.15319100  |
| C   | 8.71660900   | 0.12347800  | -4.10292100 |
| H   | 8.14015500   | 0.01887300  | -5.02866900 |
| H   | 9.21114500   | 1.10856700  | -4.09255300 |

|                                              |                             |
|----------------------------------------------|-----------------------------|
| Zero-point correction=                       | 0.727173 (Hartree/Particle) |
| Thermal correction to Energy=                | 0.782299                    |
| Thermal correction to Enthalpy=              | 0.783243                    |
| Thermal correction to Gibbs Free Energy=     | 0.627933                    |
| Sum of electronic and zero-point Energies=   | -4322.968698                |
| Sum of electronic and thermal Energies=      | -4322.913572                |
| Sum of electronic and thermal Enthalpies=    | -4322.912628                |
| Sum of electronic and thermal Free Energies= | -4323.067938                |

|   |              |             |             |
|---|--------------|-------------|-------------|
| H | 9.48958700   | -0.66163400 | -4.06611100 |
| C | 3.67403100   | -0.56174900 | -0.48201300 |
| H | 3.52329000   | -0.62954100 | -1.57542300 |
| C | 2.82498700   | 0.61571500  | 0.04283000  |
| O | 1.73831800   | 0.80645300  | -0.61958500 |
| O | 3.16649400   | 1.21678700  | 1.04797300  |
| C | 3.16887700   | -1.86079600 | 0.19583000  |
| H | 3.96011500   | -2.61346900 | 0.07359100  |
| H | 3.09229800   | -1.66210300 | 1.27723500  |
| C | 1.90203100   | -2.46542700 | -0.32847200 |
| C | 1.78269900   | -3.67949700 | -0.95614000 |
| N | 0.44719600   | -3.83719000 | -1.24301300 |
| H | 2.52998300   | -4.42409900 | -1.20979800 |
| C | -0.20997300  | -2.75130600 | -0.80494800 |
| H | 0.01756000   | -4.63221700 | -1.69835000 |
| H | -1.28790400  | -2.58278900 | -0.88524700 |
| N | 0.63813900   | -1.91094200 | -0.23716600 |
| C | -13.54401800 | -0.02270300 | -1.08381700 |
| H | -13.89775200 | -0.20418800 | -2.11021800 |
| H | -13.71614600 | -0.93397700 | -0.48138400 |
| H | -14.16448700 | 0.79182500  | -0.67988200 |
| C | 13.70882400  | 0.94290800  | -0.35051800 |
| H | 14.08126600  | 1.87005800  | -0.81231200 |
| H | 13.85334200  | 1.00726200  | 0.74401300  |
| H | 14.33376800  | 0.12628900  | -0.74320500 |
| H | 1.39968200   | -0.41848800 | 2.21339200  |
| C | -1.46912400  | -2.49786700 | 1.98029700  |
| O | -1.13747900  | -1.41998600 | 2.25401600  |
| O | -1.75545000  | -3.59233500 | 1.75209700  |

## TS2

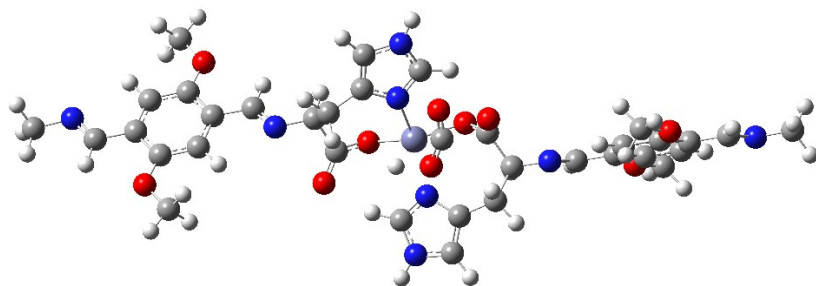

0 2

|   |              |             |             |
|---|--------------|-------------|-------------|
| N | -12.16922500 | 0.14632900  | 0.98564600  |
| C | -11.27480200 | 0.64231800  | 0.23672900  |
| H | -11.50385400 | 1.40656000  | -0.52613200 |
| C | -9.86048600  | 0.22992300  | 0.33400300  |
| C | -9.47713800  | -0.72875500 | 1.27578700  |
| C | -8.89416300  | 0.80057700  | -0.51746400 |
| C | -8.14729700  | -1.13133900 | 1.38568700  |
| H | -10.26696400 | -1.13437700 | 1.90676600  |
| C | -7.56442000  | 0.39755400  | -0.40831800 |
| C | -7.18175900  | -0.56118600 | 0.53337200  |
| H | -6.77236800  | 0.80660000  | -1.03468000 |
| C | -5.76580600  | -0.96616600 | 0.63237500  |
| H | -5.51574100  | -1.67105900 | 1.44323600  |
| N | -4.89261000  | -0.51833800 | -0.17158400 |
| O | -9.32901900  | 1.72706000  | -1.40642100 |
| O | -7.71031800  | -2.05624500 | 2.27500900  |
| C | -8.38366900  | 2.31997300  | -2.25810700 |
| H | -7.60740600  | 2.85569000  | -1.68800200 |
| H | -7.89571400  | 1.57035900  | -2.90220200 |
| H | -8.92969600  | 3.03366900  | -2.88478000 |
| C | -8.64567900  | -2.62190600 | 3.15475500  |
| H | -8.09484900  | -3.32390200 | 3.79031800  |
| H | -9.11905300  | -1.85362500 | 3.78771900  |
| H | -9.43348500  | -3.16716800 | 2.60960700  |
| C | -3.52762800  | -0.94751000 | 0.00100100  |
| H | -3.40892700  | -1.68153900 | 0.81813500  |
| C | -2.61866000  | 0.26051700  | 0.29953200  |
| O | -1.72802200  | 0.05725500  | 1.20392400  |
| O | -2.72108000  | 1.27051900  | -0.38727000 |
| C | -3.04823400  | -1.54827800 | -1.33758100 |
| H | -3.82004600  | -2.24736200 | -1.68902300 |

|                                              |                             |
|----------------------------------------------|-----------------------------|
| Zero-point correction=                       | 0.726609 (Hartree/Particle) |
| Thermal correction to Energy=                | 0.781248                    |
| Thermal correction to Enthalpy=              | 0.782192                    |
| Thermal correction to Gibbs Free Energy=     | 0.627161                    |
| Sum of electronic and zero-point Energies=   | -4322.928808                |
| Sum of electronic and thermal Energies=      | -4322.874168                |
| Sum of electronic and thermal Enthalpies=    | -4322.873224                |
| Sum of electronic and thermal Free Energies= | -4323.028255                |

|    |              |             |             |
|----|--------------|-------------|-------------|
| H  | -3.00731300  | -0.71925100 | -2.06101200 |
| C  | -1.74718200  | -2.29205600 | -1.31129200 |
| C  | -1.53419200  | -3.55925800 | -1.79054500 |
| N  | -0.19861200  | -3.82422000 | -1.60168500 |
| H  | -2.21713600  | -4.27054300 | -2.24292600 |
| C  | 0.36831300   | -2.75485800 | -1.01927800 |
| H  | 0.28786800   | -4.67745000 | -1.84448400 |
| H  | 1.42650800   | -2.67913500 | -0.74108000 |
| N  | -0.53971600  | -1.81017200 | -0.83618400 |
| Zn | 0.01801600   | -0.20102400 | 0.36452000  |
| N  | 12.31707200  | -0.19886500 | 0.74107600  |
| C  | 11.42272400  | -0.50149300 | -0.10484600 |
| H  | 11.66510100  | -0.96935000 | -1.07484900 |
| C  | 9.99085700   | -0.24830300 | 0.15029700  |
| C  | 9.58972500   | 0.33355400  | 1.35608100  |
| C  | 9.02543400   | -0.59474200 | -0.81512100 |
| C  | 8.24308300   | 0.57811100  | 1.61852400  |
| H  | 10.37973000  | 0.57954800  | 2.06449700  |
| C  | 7.67860900   | -0.34889200 | -0.55329100 |
| C  | 7.27864600   | 0.23319200  | 0.65194400  |
| H  | 6.88575700   | -0.60277300 | -1.25612000 |
| C  | 5.84454700   | 0.47413000  | 0.90585100  |
| H  | 5.57932500   | 0.81682900  | 1.92070400  |
| N  | 4.97396100   | 0.28710100  | 0.00336600  |
| O  | 9.47738400   | -1.16131500 | -1.96086600 |
| O  | 7.78804900   | 1.14165200  | 2.76475300  |
| C  | 8.53272000   | -1.53288200 | -2.93051300 |
| H  | 7.82168900   | -2.27681300 | -2.53613500 |
| H  | 7.96604000   | -0.66081700 | -3.29562600 |
| H  | 9.09340100   | -1.97304200 | -3.76249000 |
| C  | 8.72359400   | 1.46175000  | 3.76008300  |
| H  | 8.15862800   | 1.88200600  | 4.59940000  |
| H  | 9.27019000   | 0.56754500  | 4.10168300  |
| H  | 9.45250500   | 2.20792200  | 3.40350200  |
| C  | 3.59049300   | 0.51199000  | 0.33476400  |
| H  | 3.45874100   | 0.96816000  | 1.33389800  |
| C  | 2.80689100   | -0.81949000 | 0.30936700  |
| O  | 1.72749100   | -0.81434200 | 1.01555000  |
| O  | 3.19306100   | -1.73849700 | -0.39011400 |
| C  | 2.99242800   | 1.44850800  | -0.74882400 |
| H  | 3.78722100   | 2.14428900  | -1.04979700 |
| H  | 2.75474300   | 0.83958400  | -1.63798200 |
| C  | 1.80777700   | 2.26669700  | -0.34345400 |
| C  | 1.74063800   | 3.63123900  | -0.22983400 |
| N  | 0.45622100   | 3.92009700  | 0.16963200  |
| H  | 2.49062800   | 4.39707700  | -0.39699700 |
| C  | -0.22096600  | 2.76758200  | 0.28475200  |
| H  | 0.06343100   | 4.84151900  | 0.31242100  |
| H  | -1.27900400  | 2.67277200  | 0.52883000  |
| N  | 0.56558000   | 1.75293100  | -0.02399600 |
| C  | -13.52356500 | 0.60571200  | 0.82406800  |
| H  | -13.88557600 | 1.02175100  | 1.77664900  |
| H  | -13.64131100 | 1.37025200  | 0.03376700  |
| H  | -14.17538200 | -0.24977800 | 0.58990000  |
| C  | 13.68907500  | -0.48203200 | 0.41127400  |
| H  | 14.11978500  | -1.14762300 | 1.17485600  |
| H  | 13.81906500  | -0.94935200 | -0.58257700 |
| H  | 14.27418400  | 0.44971900  | 0.44420600  |
| H  | 0.40406200   | 0.35102600  | -2.39287800 |
| C  | -1.26309800  | 1.71667100  | -2.57078600 |
| O  | -0.87460000  | 0.57428900  | -2.60765300 |
| O  | -1.14730100  | 2.87133100  | -2.50263300 |

### P2 complex

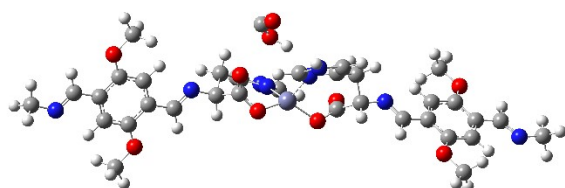

|     |              |             |                                 |                             |
|-----|--------------|-------------|---------------------------------|-----------------------------|
| 0 2 |              |             | Zero-point correction=          | 0.734513 (Hartree/Particle) |
| N   | -12.09095300 | -0.78963000 | Thermal correction to Energy=   | 0.789291                    |
| C   | -11.28046000 | 0.02910400  | Thermal correction to Enthalpy= | 0.790235                    |

|    |              |             |             |                                              |              |
|----|--------------|-------------|-------------|----------------------------------------------|--------------|
| H  | -11.60749200 | 1.00353300  | 0.29241800  | Thermal correction to Gibbs Free Energy=     | 0.634013     |
| C  | -9.83832900  | -0.26557400 | 0.58085600  | Sum of electronic and zero-point Energies=   | -4322.967428 |
| C  | -9.33254000  | -1.47294800 | 1.07035700  | Sum of electronic and thermal Energies=      | -4322.912650 |
| C  | -8.96838600  | 0.66732700  | -0.01711500 | Sum of electronic and thermal Enthalpies=    | -4322.911706 |
| C  | -7.97420200  | -1.76989800 | 0.97503000  | Sum of electronic and thermal Free Energies= | -4323.067928 |
| H  | -10.05182300 | -2.15465500 | 1.52249700  |                                              |              |
| C  | -7.61007200  | 0.36992800  | -0.11360000 |                                              |              |
| C  | -7.10529600  | -0.83741500 | 0.37588400  |                                              |              |
| H  | -6.88834000  | 1.05371600  | -0.55934800 |                                              |              |
| C  | -5.66133100  | -1.12332000 | 0.26694500  |                                              |              |
| H  | -5.30868100  | -2.05013800 | 0.75061100  |                                              |              |
| N  | -4.87828500  | -0.33596700 | -0.34596800 |                                              |              |
| O  | -9.51933900  | 1.82065500  | -0.46756200 |                                              |              |
| O  | -7.42015600  | -2.92183700 | 1.42696500  |                                              |              |
| C  | -8.67022500  | 2.77344400  | -1.05365900 |                                              |              |
| H  | -7.89888100  | 3.11585900  | -0.34506900 |                                              |              |
| H  | -8.17268500  | 2.37130400  | -1.95110100 |                                              |              |
| H  | -9.30118400  | 3.62194000  | -1.34010700 |                                              |              |
| C  | -8.25754900  | -3.85592000 | 2.05529700  |                                              |              |
| H  | -7.62175800  | -4.69569000 | 2.35657200  |                                              |              |
| H  | -8.74028700  | -3.42704200 | 2.94864400  |                                              |              |
| H  | -9.04028500  | -4.22072100 | 1.37014700  |                                              |              |
| C  | -3.47698400  | -0.66842500 | -0.39359400 |                                              |              |
| H  | -3.25327200  | -1.64252100 | 0.07888800  |                                              |              |
| C  | -2.65363200  | 0.41931600  | 0.32704200  |                                              |              |
| O  | -1.67027700  | -0.02263900 | 1.03640300  |                                              |              |
| O  | -2.91620100  | 1.59585800  | 0.13531500  |                                              |              |
| C  | -3.04661500  | -0.67962000 | -1.87693900 |                                              |              |
| H  | -3.83097600  | -1.19852600 | -2.44528600 |                                              |              |
| H  | -3.03382300  | 0.36490700  | -2.22346000 |                                              |              |
| C  | -1.75030100  | -1.36230900 | -2.19038200 |                                              |              |
| C  | -1.56726000  | -2.33933700 | -3.13446900 |                                              |              |
| N  | -0.23260800  | -2.66777800 | -3.10046800 |                                              |              |
| H  | -2.27182400  | -2.81019300 | -3.81178300 |                                              |              |
| C  | 0.36445300   | -1.91917200 | -2.16044300 |                                              |              |
| H  | 0.23268000   | -3.36056700 | -3.67262200 |                                              |              |
| H  | 1.42568700   | -1.96595900 | -1.88856800 |                                              |              |
| N  | -0.52279500  | -1.11392000 | -1.59740900 |                                              |              |
| Zn | 0.02839000   | -0.12752100 | 0.13070500  |                                              |              |
| N  | 12.30596700  | -0.88188800 | 0.80162800  |                                              |              |
| C  | 11.43167500  | -0.82319600 | -0.11429000 |                                              |              |
| H  | 11.68570700  | -0.95942800 | -1.17981600 |                                              |              |
| C  | 10.00813200  | -0.56775400 | 0.18309900  |                                              |              |
| C  | 9.59341100   | -0.38940900 | 1.50558600  |                                              |              |
| C  | 9.06464700   | -0.50640700 | -0.86124200 |                                              |              |
| C  | 8.25421900   | -0.14995600 | 1.80868000  |                                              |              |
| H  | 10.36667700  | -0.44817300 | 2.27051000  |                                              |              |
| C  | 7.72561500   | -0.26618200 | -0.55855000 |                                              |              |
| C  | 7.31179800   | -0.08762200 | 0.76396200  |                                              |              |
| H  | 6.94944700   | -0.21576000 | -1.32143900 |                                              |              |
| C  | 5.88632900   | 0.15754200  | 1.05696800  |                                              |              |
| H  | 5.60685400   | 0.19189500  | 2.12383500  |                                              |              |
| N  | 5.03727600   | 0.31115200  | 0.12736600  |                                              |              |
| O  | 9.52953500   | -0.69230900 | -2.12095000 |                                              |              |
| O  | 7.78686200   | 0.03394500  | 3.06772200  |                                              |              |
| C  | 8.60664600   | -0.65132500 | -3.17788500 |                                              |              |
| H  | 7.83529500   | -1.43102100 | -3.06966900 |                                              |              |
| H  | 8.11057100   | 0.33092600  | -3.24137100 |                                              |              |
| H  | 9.17464400   | -0.82888700 | -4.09771000 |                                              |              |
| C  | 8.69818200   | -0.05541800 | 4.13113400  |                                              |              |
| H  | 8.12465200   | 0.10359000  | 5.05088100  |                                              |              |
| H  | 9.17695500   | -1.04752100 | 4.16863700  |                                              |              |
| H  | 9.48318300   | 0.71469500  | 4.05500800  |                                              |              |
| C  | 3.66084100   | 0.52131100  | 0.49215200  |                                              |              |
| H  | 3.51423500   | 0.63371100  | 1.58211800  |                                              |              |
| C  | 2.77766400   | -0.64119500 | -0.00099800 |                                              |              |
| O  | 1.71979100   | -0.83362000 | 0.71109700  |                                              |              |
| O  | 3.06420500   | -1.21847400 | -1.03559700 |                                              |              |
| C  | 3.17251500   | 1.79902100  | -0.23844600 |                                              |              |
| H  | 3.97290200   | 2.54697400  | -0.15582200 |                                              |              |
| H  | 3.07843600   | 1.55260300  | -1.30790100 |                                              |              |
| C  | 1.91795500   | 2.42774000  | 0.28228500  |                                              |              |
| C  | 1.82001800   | 3.62414300  | 0.94103600  |                                              |              |
| N  | 0.48505700   | 3.80143200  | 1.22537900  |                                              |              |
| H  | 2.58099900   | 4.34580500  | 1.21881300  |                                              |              |

|   |              |             |             |
|---|--------------|-------------|-------------|
| C | -0.19508900  | 2.75145300  | 0.75291500  |
| H | 0.06435400   | 4.60203700  | 1.68040400  |
| H | -1.27982300  | 2.61165500  | 0.81918700  |
| N | 0.63853600   | 1.90020800  | 0.16418300  |
| C | -13.48045400 | -0.42133200 | 1.29511000  |
| H | -13.80917900 | -0.43202200 | 2.34553400  |
| H | -13.69829500 | 0.57343400  | 0.86387800  |
| H | -14.08710800 | -1.17558500 | 0.77101600  |
| C | 13.67128200  | -1.13625500 | 0.42391900  |
| H | 14.02828700  | -2.04565000 | 0.93093200  |
| H | 13.81494800  | -1.25623900 | -0.66597300 |
| H | 14.30906000  | -0.31167200 | 0.77723000  |
| H | -0.30500600  | 1.96316500  | -1.67403100 |
| C | -1.82337000  | 2.98163000  | -2.12969800 |
| O | -1.08912000  | 1.89976800  | -2.26353000 |
| O | -1.61300400  | 3.96924600  | -1.51609600 |

### R3 complex

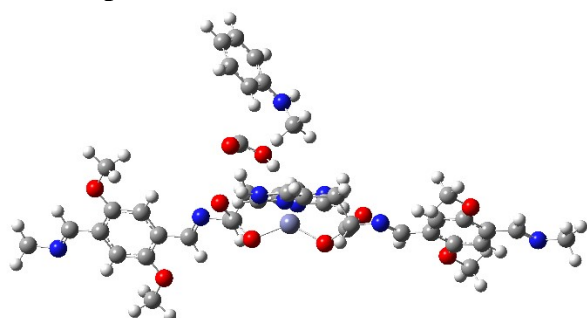

|     |              |             |             |                                              |                             |
|-----|--------------|-------------|-------------|----------------------------------------------|-----------------------------|
| 0 2 |              |             |             | Zero-point correction=                       | 0.882167 (Hartree/Particle) |
| N   | 11.98097000  | -2.33625100 | -0.69340200 | Thermal correction to Energy=                | 0.945948                    |
| C   | 11.18665100  | -1.35442700 | -0.58323700 | Thermal correction to Enthalpy=              | 0.946892                    |
| H   | 11.53731300  | -0.30815200 | -0.61115300 | Thermal correction to Gibbs Free Energy=     | 0.768241                    |
| C   | 9.73285100   | -1.54396600 | -0.40965600 | Sum of electronic and zero-point Energies=   | -4649.348906                |
| C   | 9.19793000   | -2.83455300 | -0.37068000 | Sum of electronic and thermal Energies=      | -4649.285124                |
| C   | 8.88130400   | -0.42844600 | -0.28635200 | Sum of electronic and thermal Enthalpies=    | -4649.284180                |
| C   | 7.82822100   | -3.03599100 | -0.21064500 | Sum of electronic and thermal Free Energies= | -4649.462832                |
| H   | 9.90430700   | -3.65759700 | -0.47147400 |                                              |                             |
| C   | 7.51155300   | -0.62991000 | -0.12472900 |                                              |                             |
| C   | 6.97768600   | -1.92050200 | -0.08619600 |                                              |                             |
| H   | 6.80320500   | 0.19260600  | -0.03045600 |                                              |                             |
| C   | 5.52237200   | -2.10379400 | 0.07766100  |                                              |                             |
| H   | 5.14795000   | -3.13887800 | 0.00180300  |                                              |                             |
| N   | 4.75419800   | -1.11639100 | 0.28661200  |                                              |                             |
| O   | 9.45999400   | 0.79568800  | -0.33676000 |                                              |                             |
| O   | 7.24608400   | -4.25966800 | -0.16227800 |                                              |                             |
| C   | 8.62954500   | 1.92376100  | -0.23194300 |                                              |                             |
| H   | 7.88700600   | 1.95436300  | -1.04550200 |                                              |                             |
| H   | 8.09799600   | 1.94409100  | 0.73323700  |                                              |                             |
| H   | 9.28164700   | 2.80106100  | -0.30359600 |                                              |                             |
| C   | 8.06727700   | -5.38785400 | -0.30837500 |                                              |                             |
| H   | 7.41143800   | -6.26365700 | -0.25267800 |                                              |                             |
| H   | 8.58693300   | -5.38476000 | -1.28047900 |                                              |                             |
| H   | 8.81944500   | -5.44578700 | 0.49540800  |                                              |                             |
| C   | 3.34099200   | -1.36540800 | 0.41330600  |                                              |                             |
| H   | 3.08952000   | -2.44064000 | 0.36022600  |                                              |                             |
| C   | 2.57437700   | -0.63090300 | -0.70549300 |                                              |                             |
| O   | 1.59142700   | -1.29292200 | -1.21732900 |                                              |                             |
| O   | 2.87221800   | 0.52057800  | -0.97846700 |                                              |                             |
| C   | 2.87818200   | -0.76947000 | 1.76107300  |                                              |                             |
| H   | 3.62160900   | -1.04851400 | 2.52062700  |                                              |                             |
| H   | 2.90979000   | 0.32611600  | 1.66288200  |                                              |                             |
| C   | 1.54108200   | -1.21763300 | 2.26699900  |                                              |                             |
| C   | 1.28862400   | -1.73395200 | 3.51165700  |                                              |                             |
| N   | -0.06181000  | -1.98708600 | 3.56135500  |                                              |                             |
| H   | 1.95522300   | -1.93136600 | 4.34445300  |                                              |                             |
| C   | -0.60104200  | -1.64244200 | 2.38206800  |                                              |                             |
| H   | -0.57374600  | -2.37771100 | 4.34188300  |                                              |                             |
| H   | -1.65822000  | -1.74661600 | 2.11220900  |                                              |                             |
| N   | 0.33836100   | -1.16600500 | 1.57989700  |                                              |                             |
| Zn  | -0.12993400  | -0.95217800 | -0.42345500 |                                              |                             |
| N   | -12.12036100 | -2.30819100 | 0.53077700  |                                              |                             |
| C   | -11.49823500 | -1.36232300 | -0.03928400 |                                              |                             |

|            |              |             |             |
|------------|--------------|-------------|-------------|
| H          | -12.02144700 | -0.49691400 | -0.48180200 |
| C          | -10.02589900 | -1.35407200 | -0.15070600 |
| C          | -9.28034200  | -2.41031800 | 0.37854900  |
| C          | -9.36761300  | -0.28541600 | -0.78966600 |
| C          | -7.88931000  | -2.42254500 | 0.28472600  |
| H          | -9.84215700  | -3.20972100 | 0.85990900  |
| C          | -7.97727400  | -0.29772400 | -0.88316500 |
| C          | -7.23007000  | -1.35199300 | -0.35158100 |
| H          | -7.41595900  | 0.50060400  | -1.36643400 |
| C          | -5.75593500  | -1.34912700 | -0.45731800 |
| H          | -5.24183500  | -2.19595500 | 0.01661200  |
| N          | -5.15006300  | -0.40688500 | -1.05479100 |
| O          | -10.14779300 | 0.70866300  | -1.28339000 |
| O          | -7.11263600  | -3.41840700 | 0.77269500  |
| C          | -9.51904700  | 1.78471400  | -1.92632800 |
| H          | -8.83541600  | 2.31777000  | -1.24518500 |
| H          | -8.95016900  | 1.45024000  | -2.80944000 |
| H          | -10.31345600 | 2.46778300  | -2.24681900 |
| C          | -7.74028800  | -4.49553500 | 1.41559900  |
| H          | -6.94457500  | -5.17900400 | 1.73135300  |
| H          | -8.30593800  | -4.16228400 | 2.30115800  |
| H          | -8.42643200  | -5.02661700 | 0.73563700  |
| C          | -3.71059400  | -0.42133500 | -1.19875800 |
| H          | -3.47393000  | -0.73231400 | -2.22880700 |
| C          | -2.89640500  | -1.29622100 | -0.22898900 |
| O          | -1.82816500  | -1.80746300 | -0.73326200 |
| O          | -3.23430000  | -1.35975200 | 0.94555100  |
| C          | -3.21069000  | 1.03224200  | -0.99815000 |
| H          | -3.98435500  | 1.68609300  | -1.42186700 |
| H          | -3.18522700  | 1.22550400  | 0.08721400  |
| C          | -1.90553800  | 1.39641300  | -1.63415900 |
| C          | -1.72517900  | 2.28626300  | -2.65972000 |
| N          | -0.37217700  | 2.31996700  | -2.91039300 |
| H          | -2.44118300  | 2.88453900  | -3.21340900 |
| C          | 0.23869700   | 1.47722200  | -2.06913100 |
| H          | 0.10555400   | 2.89893500  | -3.59019200 |
| H          | 1.31778300   | 1.28822800  | -2.02690600 |
| N          | -0.65771400  | 0.90801200  | -1.26994600 |
| C          | 13.38367500  | -2.06078600 | -0.86066200 |
| H          | 13.73713200  | -2.51513000 | -1.79886400 |
| H          | 13.62525200  | -0.98171600 | -0.87445200 |
| H          | 13.95111900  | -2.54084900 | -0.04878400 |
| C          | -13.55639400 | -2.23705600 | 0.59486600  |
| H          | -13.87846000 | -2.27076700 | 1.64684300  |
| H          | -13.97718000 | -1.33014200 | 0.12221400  |
| H          | -13.98932500 | -3.12415300 | 0.10788100  |
| H          | 0.38712200   | 1.70678000  | 0.41585700  |
| C          | 1.89042600   | 2.83667400  | 0.52237500  |
| O          | 1.11478600   | 1.90917100  | 1.04238800  |
| O          | 1.79920400   | 3.41835000  | -0.50217300 |
| C          | 1.54950800   | 8.27792600  | 0.87049600  |
| C          | 0.91679900   | 7.64191900  | -0.19420700 |
| C          | 0.26959500   | 6.41955500  | -0.02270500 |
| C          | 0.25051300   | 5.79945700  | 1.23805100  |
| C          | 0.89361500   | 6.44595700  | 2.31106500  |
| C          | 1.53071700   | 7.66516100  | 2.12573200  |
| H          | 2.05169100   | 9.23478300  | 0.72743600  |
| H          | 0.92255700   | 8.10268300  | -1.18384900 |
| H          | -0.21045700  | 5.93942700  | -0.87472900 |
| H          | 0.89079200   | 5.97248200  | 3.29567500  |
| H          | 2.02099700   | 8.14430600  | 2.97515100  |
| N          | -0.35892900  | 4.57647100  | 1.43638300  |
| H          | -0.51532800  | 4.31311900  | 2.39923800  |
| C          | -1.22155600  | 3.98701100  | 0.45005200  |
| H          | -0.65392100  | 3.74415900  | -0.46461100 |
| H          | -1.64164600  | 3.05286300  | 0.84679200  |
| H          | -2.06355000  | 4.64320700  | 0.15757500  |
| <b>TS3</b> |              |             |             |

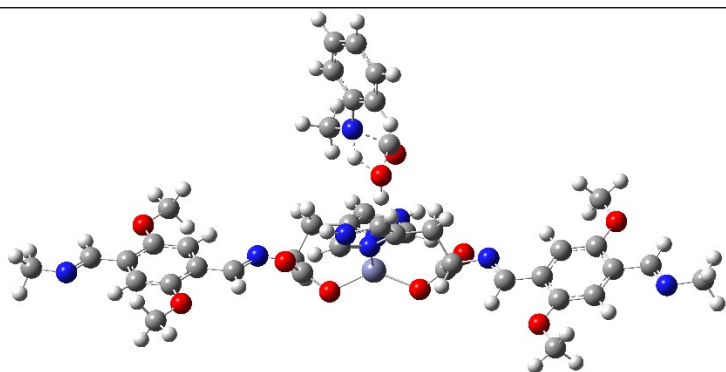

|     |              |             |             |
|-----|--------------|-------------|-------------|
| 0 2 |              |             |             |
| N   | 12.32037700  | -1.54158600 | 0.03093400  |
| C   | 11.44682600  | -0.72841000 | -0.39662800 |
| H   | 11.71760200  | 0.19121700  | -0.94391000 |
| C   | 10.00278600  | -0.95602100 | -0.19153600 |
| C   | 9.56582400   | -2.10027200 | 0.48176900  |
| C   | 9.06183300   | -0.02592400 | -0.67503300 |
| C   | 8.20717300   | -2.33574600 | 0.68355000  |
| H   | 10.33823600  | -2.78367700 | 0.83225900  |
| C   | 7.70296200   | -0.26060600 | -0.47169500 |
| C   | 7.26721800   | -1.40436600 | 0.20169000  |
| H   | 6.92811600   | 0.41731100  | -0.82840600 |
| C   | 5.82117900   | -1.62946900 | 0.39620600  |
| H   | 5.53106600   | -2.60197200 | 0.82942200  |
| N   | 4.96922500   | -0.74792200 | 0.07266700  |
| O   | 9.54802300   | 1.06025100  | -1.32398500 |
| O   | 7.71743100   | -3.42256900 | 1.32995500  |
| C   | 8.62821700   | 1.99190200  | -1.83185100 |
| H   | 7.95200900   | 1.52970400  | -2.56904200 |
| H   | 8.02186900   | 2.43885100  | -1.02728400 |
| H   | 9.21486300   | 2.77739800  | -2.32077700 |
| C   | 8.63015200   | -4.38175400 | 1.79366500  |
| H   | 8.04020600   | -5.17535300 | 2.26530100  |
| H   | 9.21939900   | -4.81027600 | 0.96646900  |
| H   | 9.32247700   | -3.95344900 | 2.53699700  |
| C   | 3.57289100   | -1.04307200 | 0.26604000  |
| H   | 3.40758900   | -2.00880100 | 0.77904100  |
| C   | 2.84160000   | -1.08037100 | -1.09514500 |
| O   | 1.83130500   | -1.88366100 | -1.14246800 |
| O   | 3.19140500   | -0.32390200 | -1.98254200 |
| C   | 2.95788400   | 0.11283800  | 1.09963100  |
| H   | 3.72672600   | 0.44990100  | 1.80791900  |
| H   | 2.75672300   | 0.96235900  | 0.42700700  |
| C   | 1.73469500   | -0.22093000 | 1.89278200  |
| C   | 1.58255100   | -0.14061300 | 3.25256300  |
| N   | 0.28840300   | -0.52509700 | 3.51857600  |
| H   | 2.27882900   | 0.15716400  | 4.02928100  |
| C   | -0.31180200  | -0.83047200 | 2.35669700  |
| H   | -0.14863400  | -0.57748800 | 4.42964400  |
| H   | -1.34616600  | -1.17147600 | 2.24167500  |
| N   | 0.53542700   | -0.65090200 | 1.35761200  |
| Zn  | 0.10153400   | -1.30220800 | -0.55212800 |
| N   | -11.88883400 | -2.04039000 | 0.97167400  |
| C   | -11.25111300 | -1.31231700 | 0.15316000  |
| H   | -11.75934600 | -0.59803500 | -0.51775300 |
| C   | -9.78012300  | -1.37072200 | 0.04045600  |
| C   | -9.05289500  | -2.25027600 | 0.84632100  |
| C   | -9.10435300  | -0.54507700 | -0.87868500 |
| C   | -7.66345700  | -2.32309100 | 0.75496600  |
| H   | -9.62734500  | -2.86590100 | 1.53726500  |
| C   | -7.71565900  | -0.61711400 | -0.96896000 |
| C   | -6.98663200  | -1.49445600 | -0.16207700 |
| H   | -7.14124900  | -0.00428700 | -1.66211900 |
| C   | -5.51374800  | -1.56020700 | -0.27251100 |
| H   | -5.01447300  | -2.26793400 | 0.40234100  |
| N   | -4.89393300  | -0.82270100 | -1.09944600 |
| O   | -9.86706400  | 0.28500200  | -1.63443500 |
| O   | -6.90456700  | -3.15713100 | 1.50363500  |
| C   | -9.22121200  | 1.10743200  | -2.56833800 |
| H   | -8.51755900  | 1.80008200  | -2.07764400 |

|                                              |                             |
|----------------------------------------------|-----------------------------|
| Zero-point correction=                       | 0.878761 (Hartree/Particle) |
| Thermal correction to Energy=                | 0.941005                    |
| Thermal correction to Enthalpy=              | 0.941949                    |
| Thermal correction to Gibbs Free Energy=     | 0.768061                    |
| Sum of electronic and zero-point Energies=   | -4649.294603                |
| Sum of electronic and thermal Energies=      | -4649.232360                |
| Sum of electronic and thermal Enthalpies=    | -4649.231416                |
| Sum of electronic and thermal Free Energies= | -4649.405304                |

|   |              |             |             |
|---|--------------|-------------|-------------|
| H | -8.67001000  | 0.51348500  | -3.31588200 |
| H | -10.00318800 | 1.68587200  | -3.07273700 |
| C | -7.54919100  | -3.99262700 | 2.42758600  |
| H | -6.76530900  | -4.57624900 | 2.92239300  |
| H | -8.09955500  | -3.40859800 | 3.18342800  |
| H | -8.25269200  | -4.67894900 | 1.92826800  |
| C | -3.45783300  | -0.91450300 | -1.25490100 |
| H | -3.25488800  | -1.48178100 | -2.17725400 |
| C | -2.64673700  | -1.54909000 | -0.10731900 |
| O | -1.60106500  | -2.20010200 | -0.47990100 |
| O | -2.97037600  | -1.31711600 | 1.04955200  |
| C | -2.91467200  | 0.52738400  | -1.44111500 |
| H | -3.71389800  | 1.09487100  | -1.93701300 |
| H | -2.78397400  | 0.96780100  | -0.43690000 |
| C | -1.66839300  | 0.68322800  | -2.25498500 |
| C | -1.54796600  | 1.31546600  | -3.46407900 |
| N | -0.22955700  | 1.20452400  | -3.82830300 |
| H | -2.28459600  | 1.82680800  | -4.07461400 |
| C | 0.42696900   | 0.54519000  | -2.86693400 |
| H | 0.20706700   | 1.62723800  | -4.63756500 |
| H | 1.49586400   | 0.30121300  | -2.87846800 |
| N | -0.41518600  | 0.21371400  | -1.89586800 |
| C | 13.70641900  | -1.24165400 | -0.21461100 |
| H | 14.16562400  | -2.06681900 | -0.78015900 |
| H | 13.86445300  | -0.29832800 | -0.76978200 |
| H | 14.24461600  | -1.18329400 | 0.74382100  |
| C | -13.32235000 | -1.92067500 | 1.01528200  |
| H | -13.63642600 | -1.64410000 | 2.03332800  |
| H | -13.72737600 | -1.17773300 | 0.30320300  |
| H | -13.77847200 | -2.89982400 | 0.80372100  |
| H | 0.21581600   | 1.50751700  | -0.35509700 |
| C | 0.22921900   | 3.63613400  | -0.72754900 |
| O | 0.34610900   | 2.27927100  | 0.22651800  |
| O | 0.08491700   | 3.45278400  | -1.90710400 |
| C | -0.09543000  | 6.95561700  | 3.09973400  |
| C | -1.25326500  | 7.08846400  | 2.34037800  |
| C | -1.57233600  | 6.14715200  | 1.35961300  |
| C | -0.72595500  | 5.05906300  | 1.14069600  |
| C | 0.44051900   | 4.91958100  | 1.90628500  |
| C | 0.74897500   | 5.86617500  | 2.87593700  |
| H | 0.15051300   | 7.69539700  | 3.86220600  |
| H | -1.92179200  | 7.93498200  | 2.50376500  |
| H | -2.48083400  | 6.27485700  | 0.77311800  |
| H | 1.09407900   | 4.06349200  | 1.73313700  |
| H | 1.66038500   | 5.75088900  | 3.46439300  |
| N | -1.01328500  | 4.05681400  | 0.15593100  |
| H | -0.67941800  | 2.89049500  | 0.53612700  |
| C | -2.23590200  | 4.19990500  | -0.62868700 |
| H | -2.21680900  | 5.12828400  | -1.21777200 |
| H | -2.29391100  | 3.35294400  | -1.32231800 |
| H | -3.10881700  | 4.19848200  | 0.03634400  |

### P3 complex

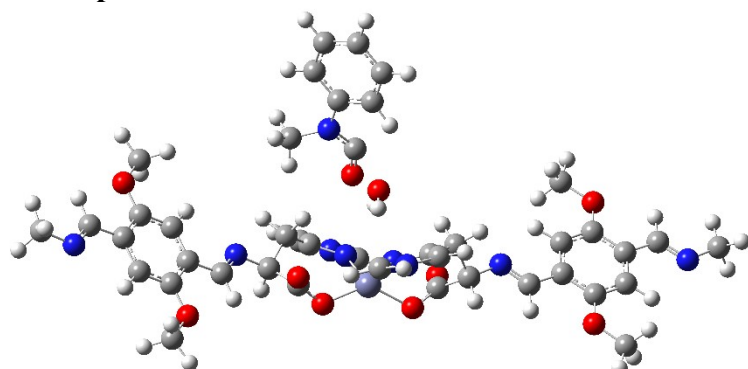

|     |             |             |             |                                            |                             |
|-----|-------------|-------------|-------------|--------------------------------------------|-----------------------------|
| 0 2 |             |             |             | Zero-point correction=                     | 0.881453 (Hartree/Particle) |
| N   | 12.33571100 | -0.25647400 | 0.14562200  | Thermal correction to Energy=              | 0.945556                    |
| C   | 11.30766900 | 0.45515600  | -0.06375400 | Thermal correction to Enthalpy=            | 0.946500                    |
| H   | 11.37736600 | 1.51806000  | -0.35347500 | Thermal correction to Gibbs Free Energy=   | 0.767677                    |
| C   | 9.94211700  | -0.09050900 | 0.06579700  | Sum of electronic and zero-point Energies= | -4649.363326                |
| C   | 9.75707600  | -1.42945700 | 0.42142500  | Sum of electronic and thermal Energies=    | -4649.299224                |
| C   | 8.82344700  | 0.73204700  | -0.17140700 | Sum of electronic and thermal Enthalpies=  | -4649.298280                |

|    |              |             |             |                                              |              |
|----|--------------|-------------|-------------|----------------------------------------------|--------------|
| C  | 8.47675400   | -1.96522700 | 0.54674200  | Sum of electronic and thermal Free Energies= | -4649.477102 |
| H  | 10.65830200  | -2.01710600 | 0.59155000  |                                              |              |
| C  | 7.54286100   | 0.19627200  | -0.04536600 |                                              |              |
| C  | 7.35883100   | -1.14179200 | 0.31111000  |                                              |              |
| H  | 6.64017300   | 0.77945000  | -0.22433900 |                                              |              |
| C  | 5.99092000   | -1.68347700 | 0.43060200  |                                              |              |
| H  | 5.90992300   | -2.77011500 | 0.60540800  |                                              |              |
| N  | 4.97314400   | -0.93460800 | 0.32979100  |                                              |              |
| O  | 9.06903600   | 2.01916900  | -0.51806600 |                                              |              |
| O  | 8.22820500   | -3.25309300 | 0.89109500  |                                              |              |
| C  | 7.97017200   | 2.85407600  | -0.77743100 |                                              |              |
| H  | 7.36218300   | 2.47176000  | -1.61324100 |                                              |              |
| H  | 7.32539300   | 2.95846500  | 0.11031300  |                                              |              |
| H  | 8.37775000   | 3.83515900  | -1.04489700 |                                              |              |
| C  | 9.32385100   | -4.10519500 | 1.09525200  |                                              |              |
| H  | 8.91420400   | -5.09076800 | 1.34252100  |                                              |              |
| H  | 9.94483400   | -4.18727800 | 0.18821800  |                                              |              |
| H  | 9.95680600   | -3.75606000 | 1.92756600  |                                              |              |
| C  | 3.67028200   | -1.53878700 | 0.42465000  |                                              |              |
| H  | 3.70705400   | -2.59377200 | 0.75609600  |                                              |              |
| C  | 2.94342500   | -1.49467400 | -0.93480500 |                                              |              |
| O  | 1.93739000   | -2.30282600 | -0.99958300 |                                              |              |
| O  | 3.28459900   | -0.69946000 | -1.79033600 |                                              |              |
| C  | 2.84278700   | -0.70473400 | 1.43973300  |                                              |              |
| H  | 3.51524200   | -0.45986300 | 2.27305400  |                                              |              |
| H  | 2.56170800   | 0.25121400  | 0.96936100  |                                              |              |
| C  | 1.62124300   | -1.35073000 | 2.01463000  |                                              |              |
| C  | 1.46755400   | -1.89546800 | 3.26261900  |                                              |              |
| N  | 0.16421800   | -2.33278100 | 3.33467800  |                                              |              |
| H  | 2.16659200   | -1.99538000 | 4.08626600  |                                              |              |
| C  | -0.44464600  | -2.05700000 | 2.17067400  |                                              |              |
| H  | -0.27565800  | -2.78474500 | 4.12636500  |                                              |              |
| H  | -1.48404900  | -2.29752300 | 1.91918700  |                                              |              |
| N  | 0.40741200   | -1.45380600 | 1.35565400  |                                              |              |
| Zn | 0.16413800   | -1.62081500 | -0.71074800 |                                              |              |
| N  | -11.82629100 | -1.37904800 | 0.98650300  |                                              |              |
| C  | -11.03154200 | -0.45451700 | 0.63944300  |                                              |              |
| H  | -11.35140500 | 0.59971800  | 0.56923900  |                                              |              |
| C  | -9.61947400  | -0.72533500 | 0.30422700  |                                              |              |
| C  | -9.12523000  | -2.03070600 | 0.36736800  |                                              |              |
| C  | -8.76556600  | 0.32683300  | -0.07915900 |                                              |              |
| C  | -7.79484000  | -2.30835200 | 0.05679500  |                                              |              |
| H  | -9.83035400  | -2.80452500 | 0.66800200  |                                              |              |
| C  | -7.43587100  | 0.04908100  | -0.39002100 |                                              |              |
| C  | -6.93947200  | -1.25519100 | -0.32379700 |                                              |              |
| H  | -6.73006300  | 0.82209900  | -0.69049400 |                                              |              |
| C  | -5.52528700  | -1.52986700 | -0.65064300 |                                              |              |
| H  | -5.19338400  | -2.56632100 | -0.49717800 |                                              |              |
| N  | -4.76019700  | -0.60988000 | -1.07441600 |                                              |              |
| O  | -9.30532700  | 1.57147200  | -0.12030200 |                                              |              |
| O  | -7.25898000  | -3.55120100 | 0.09250100  |                                              |              |
| C  | -8.47543900  | 2.63892000  | -0.49087900 |                                              |              |
| H  | -7.62829200  | 2.75193700  | 0.20563900  |                                              |              |
| H  | -8.07979200  | 2.50681500  | -1.51151000 |                                              |              |
| H  | -9.09252300  | 3.54374200  | -0.45799000 |                                              |              |
| C  | -8.07972800  | -4.61699900 | 0.48980700  |                                              |              |
| H  | -7.45826900  | -5.51867400 | 0.46196400  |                                              |              |
| H  | -8.46250400  | -4.47087900 | 1.51319700  |                                              |              |
| H  | -8.93502300  | -4.74413400 | -0.19401600 |                                              |              |
| C  | -3.38870400  | -0.93400400 | -1.40494600 |                                              |              |
| H  | -3.35367500  | -1.39917900 | -2.40445000 |                                              |              |
| C  | -2.66727900  | -1.88600200 | -0.42418600 |                                              |              |
| O  | -1.58646300  | -2.39817900 | -0.90223900 |                                              |              |
| O  | -3.08839400  | -2.04074200 | 0.71035200  |                                              |              |
| C  | -2.59143500  | 0.39677500  | -1.46620800 |                                              |              |
| H  | -3.30891800  | 1.14847000  | -1.82067100 |                                              |              |
| H  | -2.30015100  | 0.69743300  | -0.44466400 |                                              |              |
| C  | -1.38331500  | 0.45469400  | -2.34648600 |                                              |              |
| C  | -1.26623500  | 1.04328900  | -3.57823300 |                                              |              |
| N  | 0.04610300   | 0.88972900  | -3.95559400 |                                              |              |
| H  | -1.99664500  | 1.55790000  | -4.19399000 |                                              |              |
| C  | 0.69889300   | 0.24381200  | -2.98011500 |                                              |              |
| H  | 0.47771900   | 1.26295600  | -4.79115700 |                                              |              |
| H  | 1.75939000   | -0.02620200 | -2.98038000 |                                              |              |
| N  | -0.13992600  | -0.03733000 | -1.99432200 |                                              |              |

|   |              |             |             |
|---|--------------|-------------|-------------|
| C | 13.62914200  | 0.35657500  | -0.00468700 |
| H | 14.20946900  | -0.19273000 | -0.76173100 |
| H | 13.58360700  | 1.42259900  | -0.29544800 |
| H | 14.18810800  | 0.27022700  | 0.93962700  |
| C | -13.18680600 | -1.02629300 | 1.29594400  |
| H | -13.42143100 | -1.33794500 | 2.32521400  |
| H | -13.39914500 | 0.05425000  | 1.19381700  |
| H | -13.86933200 | -1.58546200 | 0.63786800  |
| H | 0.49761400   | 1.34436000  | -0.29655400 |
| C | 0.14351900   | 3.75377200  | -0.99484400 |
| O | 0.31719300   | 1.55449200  | 0.63073400  |
| O | 0.34442800   | 3.11922500  | -1.98617200 |
| C | -1.05161600  | 6.25265900  | 3.19178600  |
| C | -1.98815300  | 6.57929300  | 2.21497100  |
| C | -1.97712000  | 5.93150300  | 0.97974200  |
| C | -1.02193200  | 4.94482000  | 0.72118100  |
| C | -0.09347200  | 4.59228600  | 1.70907500  |
| C | -0.10867200  | 5.25657500  | 2.93077600  |
| H | -1.06142400  | 6.76300200  | 4.15549400  |
| H | -2.73509700  | 7.35096500  | 2.40725200  |
| H | -2.70625300  | 6.20745800  | 0.21793800  |
| H | 0.59876800   | 3.77259400  | 1.51356000  |
| H | 0.61640000   | 4.97772000  | 3.69697000  |
| N | -1.00008700  | 4.28484500  | -0.53470600 |
| H | 0.09650800   | 0.70412000  | 1.03128600  |
| C | -2.22276200  | 4.15882300  | -1.32096000 |
| H | -2.48326300  | 5.10566300  | -1.81714300 |
| H | -2.05101400  | 3.39026500  | -2.08381100 |
| H | -3.05141200  | 3.85165700  | -0.66827000 |

### P4 complex

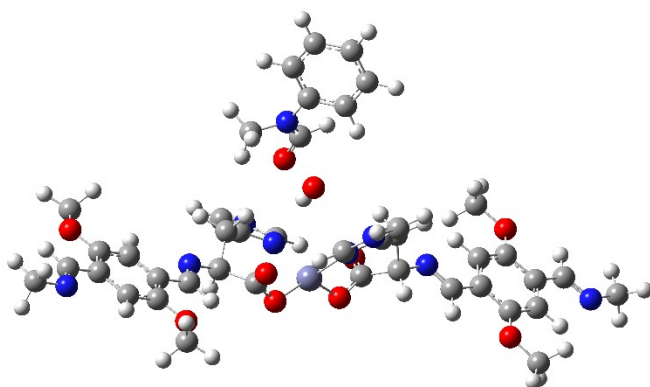

|     |              |             |             |                                              |                             |
|-----|--------------|-------------|-------------|----------------------------------------------|-----------------------------|
| 0 2 |              |             |             | Zero-point correction=                       | 0.880611 (Hartree/Particle) |
| N   | -12.29826200 | -1.68849000 | -0.05517600 | Thermal correction to Energy=                | 0.944338                    |
| C   | -11.44965000 | -0.85306900 | 0.37955400  | Thermal correction to Enthalpy=              | 0.945282                    |
| H   | -11.74777900 | 0.05154100  | 0.93755400  | Thermal correction to Gibbs Free Energy=     | 0.767506                    |
| C   | -9.99962200  | -1.03325900 | 0.16927100  | Sum of electronic and zero-point Energies=   | -4649.331523                |
| C   | -9.52859800  | -2.15600500 | -0.51705500 | Sum of electronic and thermal Energies=      | -4649.267796                |
| C   | -9.08695800  | -0.08011200 | 0.66183700  | Sum of electronic and thermal Enthalpies=    | -4649.266851                |
| C   | -8.16356700  | -2.34742900 | -0.72280800 | Sum of electronic and thermal Free Energies= | -4649.444627                |
| H   | -10.27990500 | -2.85932700 | -0.87394000 |                                              |                             |
| C   | -7.72182700  | -0.27066800 | 0.45472500  |                                              |                             |
| C   | -7.25187800  | -1.39312900 | -0.23147600 |                                              |                             |
| H   | -6.96767500  | 0.42610800  | 0.81924700  |                                              |                             |
| C   | -5.79983000  | -1.57441600 | -0.42654200 |                                              |                             |
| H   | -5.48173900  | -2.53419000 | -0.86813000 |                                              |                             |
| N   | -4.97314800  | -0.67264400 | -0.09246400 |                                              |                             |
| O   | -9.60566700  | 0.98326900  | 1.32383900  |                                              |                             |
| O   | -7.64162700  | -3.41156400 | -1.38101700 |                                              |                             |
| C   | -8.71436900  | 1.93458200  | 1.84489100  |                                              |                             |
| H   | -8.02465500  | 1.48274000  | 2.57604400  |                                              |                             |
| H   | -8.12147700  | 2.41052000  | 1.04681800  |                                              |                             |
| H   | -9.32417100  | 2.69553700  | 2.34426500  |                                              |                             |
| C   | -8.52426700  | -4.39657900 | -1.84909800 |                                              |                             |
| H   | -7.91021600  | -5.16755000 | -2.32737800 |                                              |                             |
| H   | -9.09723800  | -4.84914100 | -1.02329500 |                                              |                             |
| H   | -9.23179100  | -3.98584800 | -2.58799500 |                                              |                             |
| C   | -3.56828600  | -0.93176700 | -0.28029200 |                                              |                             |
| H   | -3.37750000  | -1.88213500 | -0.81225900 |                                              |                             |
| C   | -2.85186800  | -0.98525000 | 1.09117800  |                                              |                             |

|    |              |             |             |
|----|--------------|-------------|-------------|
| O  | -1.86817200  | -1.81731500 | 1.15632900  |
| O  | -3.19357300  | -0.21192800 | 1.96779100  |
| C  | -2.97030300  | 0.25438900  | -1.08030800 |
| H  | -3.73686800  | 0.59756400  | -1.78824300 |
| H  | -2.79636300  | 1.08509100  | -0.37591200 |
| C  | -1.72971200  | -0.03735400 | -1.86334300 |
| C  | -1.52739900  | 0.15650100  | -3.20461500 |
| N  | -0.22967300  | -0.22675600 | -3.45632600 |
| H  | -2.19054400  | 0.52888100  | -3.97808400 |
| C  | 0.32356800   | -0.64030000 | -2.30615000 |
| H  | 0.24246200   | -0.20365200 | -4.35091900 |
| H  | 1.34784600   | -1.01234700 | -2.19006000 |
| N  | -0.55873500  | -0.53486000 | -1.32577700 |
| Zn | -0.13101300  | -1.23945300 | 0.56558300  |
| N  | 11.88033800  | -2.11033800 | -0.93077100 |
| C  | 11.23382800  | -1.33955600 | -0.15946700 |
| H  | 11.73413800  | -0.57932300 | 0.46541800  |
| C  | 9.76370400   | -1.40582600 | -0.04311500 |
| C  | 9.04512200   | -2.33979700 | -0.79395800 |
| C  | 9.07935100   | -0.53217600 | 0.82359700  |
| C  | 7.65641600   | -2.41972600 | -0.69861000 |
| H  | 9.62570400   | -2.99109700 | -1.44597700 |
| C  | 7.69127400   | -0.61164900 | 0.91785200  |
| C  | 6.97090600   | -1.54281100 | 0.16568700  |
| H  | 7.10989400   | 0.03727500  | 1.57123300  |
| C  | 5.49788000   | -1.61288400 | 0.27775300  |
| H  | 5.00385700   | -2.35460700 | -0.36336700 |
| N  | 4.87325000   | -0.84039600 | 1.06800800  |
| O  | 9.83346100   | 0.35071200  | 1.52696900  |
| O  | 6.90584700   | -3.30555700 | -1.39439500 |
| C  | 9.17777000   | 1.22709400  | 2.40290400  |
| H  | 8.46869800   | 1.87882200  | 1.86614100  |
| H  | 8.63027000   | 0.67909200  | 3.18740800  |
| H  | 9.95313300   | 1.84515700  | 2.86919700  |
| C  | 7.55797100   | -4.18595300 | -2.26971500 |
| H  | 6.77963800   | -4.80501600 | -2.72896100 |
| H  | 8.10152700   | -3.64078500 | -3.05884800 |
| H  | 8.26918300   | -4.83528600 | -1.73311600 |
| C  | 3.43683000   | -0.93382600 | 1.22268500  |
| H  | 3.23393400   | -1.50685700 | 2.14175300  |
| C  | 2.63028300   | -1.56725400 | 0.06998300  |
| O  | 1.55007000   | -2.16547700 | 0.43527600  |
| O  | 2.98960100   | -1.38761900 | -1.08448300 |
| C  | 2.88818300   | 0.50695700  | 1.41442500  |
| H  | 3.70393300   | 1.08658200  | 1.86703500  |
| H  | 2.69258200   | 0.93925600  | 0.41804500  |
| C  | 1.67591200   | 0.66158800  | 2.27733600  |
| C  | 1.59314400   | 1.26931600  | 3.50237300  |
| N  | 0.27798500   | 1.17841800  | 3.88934300  |
| H  | 2.35269200   | 1.74835900  | 4.11108700  |
| C  | -0.40994200  | 0.55526500  | 2.92486700  |
| H  | -0.13336400  | 1.58638000  | 4.71870900  |
| H  | -1.48361800  | 0.33913000  | 2.94506000  |
| N  | 0.40733200   | 0.22663900  | 1.93475700  |
| C  | -13.69245900 | -1.43519800 | 0.19655900  |
| H  | -14.12387300 | -2.28059200 | 0.75404100  |
| H  | -13.87889800 | -0.50343300 | 0.76233900  |
| H  | -14.23458800 | -1.38362000 | -0.76003200 |
| C  | 13.31239600  | -1.97724600 | -0.98127700 |
| H  | 13.62476600  | -1.76263100 | -2.01470800 |
| H  | 13.70804600  | -1.18559000 | -0.31798500 |
| H  | 13.77973100  | -2.93541100 | -0.70717000 |
| H  | 0.17937100   | 1.64333000  | 0.25664600  |
| C  | -0.30876700  | 4.05685600  | 0.96029900  |
| O  | 0.35681800   | 1.92960600  | -0.66645400 |
| O  | -0.25609300  | 3.34441200  | 1.93944400  |
| C  | 0.26110600   | 6.63630600  | -3.33829300 |
| C  | 1.27226100   | 6.98357800  | -2.44273500 |
| C  | 1.44400400   | 6.26646100  | -1.26169500 |
| C  | 0.60562800   | 5.18422000  | -0.97280800 |
| C  | -0.38615600  | 4.81074900  | -1.88739400 |
| C  | -0.56430200  | 5.54914500  | -3.05534500 |
| H  | 0.12555400   | 7.20410600  | -4.25944800 |
| H  | 1.92929800   | 7.82711000  | -2.65928900 |
| H  | 2.22354100   | 6.55267300  | -0.55486100 |

|   |             |            |             |
|---|-------------|------------|-------------|
| H | -0.97729000 | 3.91464200 | -1.69497700 |
| H | -1.34187000 | 5.25458000 | -3.76173400 |
| N | 0.77355600  | 4.45661300 | 0.23148300  |
| C | 2.10991200  | 4.08834900 | 0.67106600  |
| H | 2.63651800  | 4.94198800 | 1.12439800  |
| H | 2.01074700  | 3.29748900 | 1.42461400  |
| H | 2.68809800  | 3.71427500 | -0.18402000 |
| H | -1.26331100 | 4.45949100 | 0.56172600  |

## References:

- (1) Frisch, M. J.; Trucks, G. W.; Schlegel, H. B.; Scuseria, G. E.; Robb, M. A.; Cheeseman, J. R.; Scalmani, G.; Barone, V.; Petersson, G. A.; Nakatsuji, H.; Li, X.; Caricato, M.; Marenich, A. V.; Bloino, J.; Janesko, B. G.; Gomperts, R.; Mennucci, B.; Hratchian, H. P.; Ortiz, J. V.; Izmaylov, A. F.; Sonnenberg, J. L.; Williams; Ding, F.; Lipparini, F.; Egidi, F.; Goings, J.; Peng, B.; Petrone, A.; Henderson, T.; Ranasinghe, D.; Zakrzewski, V. G.; Gao, J.; Rega, N.; Zheng, G.; Liang, W.; Hada, M.; Ehara, M.; Toyota, K.; Fukuda, R.; Hasegawa, J.; Ishida, M.; Nakajima, T.; Honda, Y.; Kitao, O.; Nakai, H.; Vreven, T.; Throssell, K.; Montgomery Jr., J. A.; Peralta, J. E.; Ogliaro, F.; Bearpark, M. J.; Heyd, J. J.; Brothers, E. N.; Kudin, K. N.; Staroverov, V. N.; Keith, T. A.; Kobayashi, R.; Normand, J.; Raghavachari, K.; Rendell, A. P.; Burant, J. C.; Iyengar, S. S.; Tomasi, J.; Cossi, M.; Millam, J. M.; Klene, M.; Adamo, C.; Cammi, R.; Ochterski, J. W.; Martin, R. L.; Morokuma, K.; Farkas, O.; Foresman, J. B.; Fox, D. J. *Gaussian 16 Rev. C.01*, 2016.
- (2) Zhao, Y.; Truhlar, D. G. The M06 Suite of Density Functionals for Main Group Thermochemistry, Thermochemical Kinetics, Noncovalent Interactions, Excited States, and Transition Elements: Two New Functionals and Systematic Testing of Four M06-Class Functionals and 12 Other Functionals. *Theoretical Chemistry Accounts* **2008**, *120* (1), 215–241.
- (3) Weigend, F.; Ahlrichs, R. Balanced Basis Sets of Split Valence, Triple Zeta Valence and Quadruple Zeta Valence Quality for H to Rn: Design and Assessment of Accuracy. *Phys. Chem. Chem. Phys.* **2005**, *7* (18), 3297.

- (4) Weigend, F. Accurate Coulomb-Fitting Basis Sets for H to Rn. *Phys. Chem. Chem. Phys.* **2006**, *8* (9), 1057.
- (5) Chemcraft - Graphical Software for Visualization of Quantum Chemistry Computations. Version 1.8, Build 682. <https://www.chemcraftprog.com>.  
<https://www.chemcraftprog.com>.
- (6) Lu, T.; Chen, F. Multiwfn: A Multifunctional Wavefunction Analyzer. *J Comput Chem* **2012**, *33* (5), 580–592.
